# Supplementary material
Source: PubMed Central journal article supplement (PMC4175992)
Supplement: NIHMS577684-supplement-CramerPaperSI.pdf [file NIHMS577684-supplement-CramerPaperSI.pdf]

## Supporting Information

### **Experimental and Theoretical Investigations into the Unusual Regioselectivity of 4,5-, 5,6-, and 6,7-Indole Aryne Cycloadditions**

Ashley N. Garr,<sup>†</sup> Diheng Luo,<sup>‡</sup> Neil Brown,<sup>‡,§</sup> Christopher J. Cramer,<sup>†</sup> Keith R. Buszek,<sup>\*,‡,§</sup> and David VanderVelde<sup>§</sup>

<sup>†</sup>*Department of Chemistry and Supercomputing Institute, University of Minnesota, 207 Pleasant Street SE, Minneapolis, MN 55455*

<sup>‡</sup>*Department of Chemistry, University of Missouri - Kansas City, 205 Spencer Chemical Laboratories, 5100 Rockhill Road, Kansas City, MO 6411*

<sup>§</sup>*The University of Kansas Center of Excellence in Chemical Methodologies and Library Development, Structural Biology Center, 2121 Simons Drive, Lawrence, KS 66047*

#### Table of Contents

|                                                                                        |                    |
|----------------------------------------------------------------------------------------|--------------------|
| <u>I. Experimental Procedures</u>                                                      | <u>Page Number</u> |
| A. General                                                                             | S3                 |
| 1, 2. General procedures for 4,5-, 5,6-, and 6,7-indolyne generation and cycloaddition | S3                 |
| <u>II. Spectroscopic Data</u>                                                          | S4                 |
| <u>III. <sup>1</sup>H NMR Spectra</u>                                                  | <u>Page Number</u> |
| 01. <b>14</b>                                                                          | S6                 |
| 02. <b>15</b>                                                                          | S7                 |
| 03. <b>17</b>                                                                          | S8                 |
| 04. <b>18</b>                                                                          | S9                 |
| 05. <b>19</b> , R = Me                                                                 | S10                |
| 06. <b>19</b> , R = Et                                                                 | S11                |
| 07. <b>19</b> , R = <i>i</i> -Pr                                                       | S12                |
| 08. <b>19</b> , R = <i>t</i> -Bu                                                       | S13                |
| 09. <b>19</b> , R = Ph                                                                 | S14                |
| 10. <b>20</b> , R = Me                                                                 | S15                |
| 11. <b>20</b> , R = Et                                                                 | S16                |
| 12. <b>20</b> , R = <i>i</i> -Pr                                                       | S17                |
| 13. <b>20</b> , R = <i>t</i> -Bu                                                       | S18                |
| 14. <b>20</b> , R = SO <sub>2</sub> Ph                                                 | S19                |
| <u>IV. <sup>13</sup>C NMR Spectra</u>                                                  | <u>Page Number</u> |
| 01. <b>14</b>                                                                          | S20                |
| 02. <b>15</b>                                                                          | S21                |
| 03. <b>17</b>                                                                          | S22                |
| 04. <b>18</b>                                                                          | S23                |
| 05. <b>19</b> , R = Me                                                                 | S24                |
| 06. <b>19</b> , R = Et                                                                 | S25                |
| 07. <b>19</b> , R = <i>i</i> -Pr                                                       | S26                |
| 08. <b>19</b> , R = <i>t</i> -Bu                                                       | S27                |

|                                                            |                    |
|------------------------------------------------------------|--------------------|
| 09. <b>19</b> , R = Ph                                     | S28                |
| 10. <b>20</b> , R = Me                                     | S29                |
| 11. <b>20</b> , R = Et                                     | S30                |
| 12. <b>20</b> , R = <i>i</i> -Pr                           | S31                |
| 13. <b>20</b> , R = <i>t</i> -Bu                           | S32                |
| 14. <b>20</b> , R = SO <sub>2</sub> Ph                     | S33                |
| <u>V. Other NMR Spectra</u>                                | <u>Page Number</u> |
| 01. NOE ( <b>19</b> , R = Me)                              | S34                |
| 02. NOE ( <b>20</b> , R = Me)                              | S35                |
| 03. COESY ( <b>19</b> , R = Me)                            | S36                |
| 04. COESY ( <b>20</b> , R = Me)                            | S37                |
| 05. NOE ( <b>19</b> , R = <i>i</i> -Pr)                    | S38                |
| 06. NOE ( <b>20</b> , R = <i>i</i> -Pr)                    | S39                |
| 07. 13C ( <b>19</b> , R = <i>t</i> -Bu)                    | S40                |
| 08. HSQC ( <b>19</b> , R = <i>t</i> -Bu)                   | S41                |
| 09. HMBC ( <b>19</b> , R = <i>t</i> -Bu)                   | S42                |
| 10. NOESY ( <b>19</b> , R = <i>t</i> -Bu)                  | S43                |
| <u>V. Calculated Structures – Coord.</u>                   | <u>Page Number</u> |
| 01. Furan                                                  | S44                |
| 02. 2-Methylfuran                                          | S45                |
| 03. 2-Ethylfuran                                           | S46                |
| 04. 2- <i>i</i> -Propylfuran                               | S47                |
| 05. 2- <i>t</i> -Butylfuran                                | S48                |
| 06. Compound <b>21</b>                                     | S49                |
| 07. Compound <b>22</b>                                     | S50                |
| 08. Compound <b>23</b>                                     | S51                |
| 09. Compound <b>27</b> (O)                                 | S52                |
| 10. Compound <b>28</b> (O)                                 | S53                |
| 11. Compound <b>29</b> (O)                                 | S54                |
| 12. Compound <b>27</b> (S)                                 | S55                |
| 13. Compound <b>28</b> (S)                                 | S56                |
| 14. Compound <b>29</b> (S)                                 | S57                |
| 15. TS <b>21 24</b> (w/furan)                              | S58                |
| 16. TS <b>21 24a</b> (w/2- <i>t</i> Bu furan)              | S59                |
| 17. TS <b>21 24b</b> (w/2- <i>t</i> Bu furan)              | S60                |
| 18. TS <b>22 25</b> (w/furan)                              | S61                |
| 19. TS <b>22 25a</b> (w/ 2- <i>t</i> Bu furan)             | S62                |
| 20. TS <b>22 25b</b> (w/2- <i>t</i> Bu furan)              | S63                |
| 21. TS <b>23 26</b> (w/furan)                              | S64                |
| 22. TS <b>23 26a</b> (w/2-Me furan)                        | S65                |
| 23. TS <b>23 26b</b> (w/2-Me furan)                        | S66                |
| 24. TS <b>23 26a</b> (w/2-Et furan)                        | S67                |
| 25. TS <b>23 26b</b> (w/2-Et furan)                        | S68                |
| 26. TS <b>23 26a</b> (w/2- <i>i</i> Pr furan)              | S69                |
| 27. TS <b>23 26b</b> (w/2- <i>i</i> Pr furan)              | S70                |
| 28. TS <b>23 26a</b> (w/2- <i>t</i> Bu furan)              | S71                |
| 29. TS <b>27</b> (O) <b>30</b> (O) (w/furan)               | S72                |
| 30. TS <b>27</b> (O) <b>30a</b> (O) (2- <i>t</i> Bu furan) | S73                |
| 31. TS <b>27</b> (O) <b>30b</b> (O) (2- <i>t</i> Bu furan) | S74                |

|                                                   |     |
|---------------------------------------------------|-----|
| 32. TS <b>28</b> (O) <b>31</b> (O) (w/furan)      | S75 |
| 33. TS <b>28</b> (O) <b>31a</b> (O) (2-tBu furan) | S76 |
| 34. TS <b>28</b> (O) <b>31b</b> (O) (2-tBu furan) | S77 |
| 35. TS <b>29</b> (O) <b>32</b> (O) (w/furan)      | S78 |
| 36. TS <b>29</b> (O) <b>32a</b> (O) (2-tBu furan) | S79 |
| 37. TS <b>27</b> (S) <b>30</b> (S) (w/furan)      | S80 |
| 38. TS <b>27</b> (S) <b>30a</b> (S) (2-tBu furan) | S81 |
| 39. TS <b>27</b> (S) <b>30b</b> (S) (2-tBu furan) | S82 |
| 40. TS <b>28</b> (S) <b>31</b> (S) (w/furan)      | S83 |
| 41. TS <b>28</b> (S) <b>31a</b> (S) (2-tBu furan) | S84 |
| 42. TS <b>28</b> (S) <b>31b</b> (S) (2-tBu furan) | S85 |
| 43. TS <b>29</b> (S) <b>32</b> (S) (w/furan)      | S86 |
| 44. TS <b>29</b> (S) <b>32a</b> (S) (2-tBu furan) | S87 |

## I. Experimental Procedures

### A. General

<sup>1</sup>H-NMR (400 MHz) and <sup>13</sup>C-NMR (100 MHz) were performed in CDCl<sub>3</sub> unless otherwise noted with reference to residual solvent at δ 7.26 ppm and 77.0 ppm, respectively. Melting points when reported are uncorrected. Unless otherwise noted, all commercially obtained starting materials were used as received. Alkylolithiums were titrated against 2-butanol in anhydrous THF with 1,10-phenanthroline as indicator prior to use. Tetrahydrofuran and diethyl ether were distilled from sodium and benzophenone under nitrogen prior to use. Dichloromethane and toluene were distilled from calcium hydride under nitrogen prior to use. Temperatures of -78 °C were obtained through use of a dry-ice acetone cold bath.

**1. General procedure for 4,5-, 5,6-, and 6,7-indolyne generation from *o*-dibromoindoles and trapping with 2-substituted furans:** A flame-dried 5 mL round bottom flask was charged with 2 mL Et<sub>2</sub>O, 20 mg of the dibromoindole **10**, **13**, or **16** (ref 4) (0.055 mmol) and 5 equiv of the 2-substituted furan (ref 8) (0.275 mmol) under an atmosphere of nitrogen, and the resulting mixture cooled to -78 °C. To this cold solution, 30 μL (2.3M, 0.069 mmol, 1.2 equiv) of n-butyllithium in hexanes solution was added dropwise, and the solution was stirred at -78 °C for 30 min. The cold bath was removed and the solution allowed to warm slowly to room temperature over 1 h. The reaction was quenched with water. The product was extracted with 3 x 5 mL diethyl ether, and the combined organic layers were dried over

magnesium sulfate, filtered and concentrated under reduced pressure. The resulting residues were purified via flash column chromatography using ethyl acetate/hexanes as the eluent. All purified products were obtained as clear or slightly yellow oils or foams.

## II. Spectroscopic Data

**Compound 14:**  $^1\text{H}$  NMR (400MHz,  $\text{CDCl}_3$ ):  $\delta$  7.55-7.50 (m, 1H), 7.43-7.37 (m, 1H), 7.36-7.26 (m, 3H), 7.16-7.11 (m, 2H), 7.00 (d,  $J = 7.9$  Hz, 1H), 6.96 (d,  $J = 5.5$ Hz, 1H), 6.93 (s, 1H), 5.72-5.70 (m, 1H), 3.75 (s, 3H), 0.81 (s, 9H);  $^{13}\text{C}$  NMR (100 MHz,  $\text{C}_6\text{D}_6$ )  $\delta$  27.78, 33.16, 33.49, 81.82, 104.92, 106.02, 114.97, 116.32, 124.21, 127.71, 128.50, 128.81, 133.19, 138.31, 139.34, 142.68, 145.32, 145.76, 147.19; HRMS (EI)  $m/e$  calcd for  $\text{C}_{23}\text{H}_{23}\text{NO}$  329.1781, found 329.1780.

**Compound 15:**  $^1\text{H}$  NMR (400 MHz,  $\text{CDCl}_3$ ):  $\delta$  7.49-7.45 (m, 2H), 7.44-7.38 (m, 3H), 7.32-7.27 (m, 1H), 7.14-7.09 (m, 2H), 7.06 (s, 1H), 6.90 (d,  $J = 8.2$ Hz, 1H), 5.92 (d,  $J = 1.6$ Hz, 1H), 3.75 (s, 3H), 1.31 (s, 9H);  $^{13}\text{C}$  NMR (100 MHz,  $\text{C}_6\text{D}_6$ )  $\delta$  27.91, 33.30, 33.66, 81.75, 104.11, 108.48, 115.00, 116.78, 123.54, 127.60, 128.13, 128.81, 132.65, 133.48, 137.01, 139.6, 141.25, 145.82, 148.19; HRMS (EI)  $m/e$  calcd for  $\text{C}_{23}\text{H}_{23}\text{NO}$  329.1781, found 329.1781.

**Compound 17:**  $^1\text{H}$  NMR (400 MHz,  $\text{C}_6\text{D}_6$ ):  $\delta$  7.69 (d,  $J = 12.8$  Hz, 1 H), 7.56 (d,  $J = 8.4$  Hz, 2 H), 7.31 (t,  $J = 7.7$  Hz, 2 H), 7.15 (m, 3 H), 6.57 (s, 1 H), 6.12 (m, 1 H), 5.16 (m, 1 H), 3.46 (s, 3 H), 1.48 (s, 9 H);  $^{13}\text{C}$  NMR (100 MHz,  $\text{C}_6\text{D}_6$ )  $\delta$  27.01, 31.96, 33.11, 81.86, 99.34, 104.74, 110.12, 111.77, 117.67, 122.93, 125.84, 125.93, 129.06, 134.93, 136.59, 142.03, 143.80, 144.21, 144.97; HRMS (EI)  $m/e$  calcd for  $\text{C}_{23}\text{H}_{23}\text{NO}$  329.1781, found 329.1782.

**Compound 18:**  $^1\text{H}$  NMR (400 MHz,  $\text{C}_6\text{D}_6$ ):  $\delta$  7.68 (d,  $J = 9.3$  Hz, 1 H), 7.60 (d,  $J = 7.1$  Hz, 2 H), 7.30 (t,  $J = 7.5$  Hz, 2 H), 7.15 (m, 3 H), 6.62 (s, 1 H), 6.27 (d,  $J = 3.7$  Hz), 5.29 (m, 1 H), 3.06 (s, 3 H), 1.17 (s, 9 H);  $^{13}\text{C}$  NMR (100 MHz,  $\text{C}_6\text{D}_6$ )  $\delta$  26.99, 32.08, 33.06, 81.72, 99.50, 102.78, 113.58, 118.22, 123.15, 125.69, 126.02, 128.65, 129.16, 134.68, 136.64, 141.06, 143.13, 143.83, 146.96; HRMS (EI)  $m/e$  calcd for  $\text{C}_{23}\text{H}_{23}\text{NO}$  329.1781, found 329.1781.

**Compound 19 (R = Me):**  $^1\text{H}$  NMR ( $\text{CD}_3\text{CN}$ , 400 MHz):  $\delta$  7.62-7.58 (m, 2H), 7.49 (d,  $J = 7.8$  Hz, 1H), 7.44-7.39 (m, 2H), 7.27 (s, 1H), 7.27-7.22 (m, 1H), 7.15-7.11 (m, 2H), 6.94 (d,  $J = 5.4$ Hz, 1H), 5.68 (d,  $J = 1.9$ Hz, 1H), 3.96 (s, 3H), 2.14 (s, 3H);  $^{13}\text{C}$  NMR (100 MHz,  $\text{CD}_3\text{CN}$ )  $\delta$  20.76, 38.16, 82.97, 91.72, 113.93, 116.32, 116.73, 126.59, 128.10, 128.23, 129.59, 130.67, 133.81, 135.59, 136.31, 146.74, 147.21, 148.82; HRMS (EI)  $m/e$  calcd for  $\text{C}_{20}\text{H}_{17}\text{NO}$  287.1311, found 287.1313.

**Compound 19 (R = Et):**  $^1\text{H}$  NMR ( $\text{C}_6\text{D}_6$ , 400 MHz):  $\delta$  7.69-7.64 (m, 3H), 7.37-7.31 (m, 2H), 7.21-7.16 (m, 1H), 7.04 (d,  $J = 7.9$  Hz, 1H), 6.83 (dd,  $J = 5.5$  Hz, 1.9 Hz, 1H), 6.55 (s, 1H), 6.52 (d,  $J = 5.4$  Hz, 1H), 5.56 (d,  $J = 1.8$  Hz, 1H), 3.07 (s, 3H), 2.39-2.32 (m, 2H), 1.20 (t,  $J = 7.4$  Hz, 3H);  $^{13}\text{C}$  NMR (100 MHz,  $\text{CD}_3\text{CN}$ )  $\delta$  10.19, 26.60, 37.85, 82.87, 96.40, 114.15, 116.46, 116.99, 126.74, 128.27, 128.38, 129.72, 131.03, 134.29, 134.71, 136.42, 146.35, 146.96, 149.30; HRMS (EI)  $m/e$  calcd for  $\text{C}_{21}\text{H}_{19}\text{NO}$  301.1468, found 301.1467.

**Compound 19 (R = *i*-Pr):**  $^1\text{H}$  NMR ( $\text{CD}_3\text{CN}$ , 400 MHz):  $\delta$  7.62-7.58 (m, 2H), 7.48 (d,  $J = 7.8$  Hz, 1H), 7.44-7.39 (m, 2H), 7.28-7.23 (m, 2H), 7.13 (d,  $J = 7.8$  Hz, 1H), 7.09 (dd,  $J = 5.5, 1.8$  Hz, 1H), 6.98 (d,  $J = 5.5$  Hz, 1H), 5.72 (d,  $J = 1.8$  Hz, 1H), 3.93 (s, 3H), 3.27 (septet,  $J = 6.8$  Hz, 1H), 1.14 (dd,  $J = 1.8, 6.8$  Hz, 6H);  $^{13}\text{C}$  NMR (100 MHz,  $\text{CD}_3\text{CN}$ )  $\delta$  18.93, 19.06, 30.06, 37.76, 82.64, 100.26, 114.15, 116.44, 117.15, 126.77, 128.29, 128.39, 129.72, 131.29, 134.48, 134.90, 136.39, 146.12, 146.47, 149.32; HRMS (EI)  $m/e$  calcd for  $\text{C}_{22}\text{H}_{21}\text{NO}$  315.1624, found 315.1624.

**Compound 19 (R = *t*-Bu):**  $^1\text{H}$  NMR ( $\text{CDCl}_3$ , 400 MHz):  $\delta$  7.56-7.51 (m, 3H), 7.43-7.38 (m, 2H), 7.29-7.24 (m, 1H), 7.16-7.12 (m, 2H), 7.03 (d,  $J = 5.5$  Hz, 1H), 7.01 (s, 1H), 5.17 (d,  $J = 1.8$  Hz, 1H), 3.99 (s, 3H), 1.45 (s, 9H);  $^{13}\text{C}$  NMR (100 MHz,  $\text{C}_6\text{D}_6$ )  $\delta$  29.6, 33.7, 39.1, 82.2, 104.6, 114.1, 116.9, 118.5, 126.4,

128.4, 129.0, 129.7, 131.0, 135.2, 135.6, 136.0, 142.6, 146.4, 149.3; HRMS (EI)  $m/e$  calcd for  $C_{23}H_{23}NO$  329.1781, found 329.1779.

**Compound 19 (R = Ph):**  $^1H$  NMR ( $C_6D_6$ , 400 MHz):  $\delta$  8.03 (d,  $J = 7.9$  Hz, 1H), 7.70-7.65 (m, 2H), 7.37-7.31 (m, 4H), 7.21-7.17 (m, 1H), 7.07-6.97 (br, 4H), 6.50 (s, 1H), 5.99 (dd,  $J = 3.6, 1.3$  Hz, 1H), 4.57 (d,  $J = 3.7$  Hz, 1H), 2.60-2.53 (m, 1H), 2.52 (s, 3H);  $^{13}C$  NMR (100 MHz,  $C_6D_6$ )  $\delta$  30.24, 83.10, 107.37, 114.23, 116.92, 117.87, 126.11, 129.32, 129.38, 129.66, 130.13, 130.45, 131.38, 131.57, 132.18, 135.61, 135.24, 135.89, 142.31, 146.20, 146.92; HRMS (EI)  $m/e$  calcd for  $C_{25}H_{19}NO$  349.1468, found 349.1470.

**Compound 20 (R = Me):**  $^1H$  NMR ( $CDCl_3$ , 400 MHz):  $\delta$  7.61-7.54 (m, 3H), 7.43-7.37 (m, 2H), 7.27-7.22 (m, 1H), 7.13-7.08 (m, 3H), 6.90 (d,  $J = 5.5$  Hz, 1H), 6.20 (d,  $J = 1.8$  Hz, 1H), 3.93 (s, 3H), 2.01 (s, 3H);  $^{13}C$  NMR (100 MHz,  $CD_3CN$ )  $\delta$  15.62, 35.15, 81.20, 90.38, 112.93, 116.06, 116.70, 126.47, 126.61, 127.78, 129.61, 129.80, 133.36, 134.74, 136.49, 145.70, 147.76, 148.01; HRMS (EI)  $m/e$  calcd for  $C_{20}H_{17}NO$  287.1311, found 287.1312.

**Compound 20 (R = Et):**  $^1H$  NMR ( $C_6D_6$ , 400 MHz):  $\delta$  7.73-7.69 (m, 3H), 7.38-7.32 (m, 2H), 7.21-7.16 (m, 1H), 7.08 (d,  $J = 7.9$  Hz, 1H), 6.77 (dd,  $J = 5.4$  Hz, 1.8 Hz, 1H), 6.69 (d,  $J = 5.4$  Hz, 1H), 6.54 (s, 1H), 5.92 (d,  $J = 1.8$  Hz, 1H), 2.84 (s, 3H), 2.35 (q,  $J = 7.5$  Hz, 2H), 1.28 (t,  $J = 7.5$  Hz, 3H);  $^{13}C$  NMR (100 MHz, THF- $d_8$ )  $\delta$  8.68, 22.40, 34.03, 80.43, 93.53, 109.99, 112.26, 115.20, 125.30, 126.27, 127.05, 128.21, 128.50, 134.61, 136.28, 136.29, 145.05, 145.83, 146.22; HRMS (EI)  $m/e$  calcd for  $C_{21}H_{19}NO$  301.1468, found 301.1469.

**Compound 20 (R = *i*-Pr):**  $^1H$  NMR ( $C_6D_6$ , 400 MHz):  $\delta$  7.73-7.68 (m, 3H), 7.38-7.32 (m, 2H), 7.21-7.17 (m, 1H), 7.12 (d,  $J = 0.5$  Hz, 1H), 6.76-6.75 (m, 2H), 6.53 (s, 1H), 5.92 (s, 1H), 2.82 (s, 3H), 2.67 (septet,  $J = 6.8$  Hz, 1H), 1.36 (dd,  $J = 8.7, 6.8$  Hz, 6H);  $^{13}C$  NMR (100 MHz, THF- $d_8$ )  $\delta$  18.61, 18.76, 28.32, 35.32, 80.99, 97.93, 114.38, 116.04, 116.92, 126.58, 127.89, 129.74, 129.89, 130.07, 133.42, 135.95, 136.65, 145.72, 146.29, 146.51; HRMS (EI)  $m/e$  calcd for  $C_{22}H_{21}NO$  315.1624, found 315.1622.

**Compound 20 (R = *t*-Bu):**  $^1H$  NMR ( $CDCl_3$ , 400 MHz):  $\delta$  7.61-7.57 (m, 2H), 7.52 (d,  $J = 8.1$  Hz, 1H), 7.43-7.38 (m, 2H), 7.36 (d,  $J = 8.1$  Hz, 1H), 7.28-7.23 (m, 1H), 7.12-7.07 (m, 3H), 6.24 (d,  $J = 1.5$  Hz, 1H), 3.93 (s, 3H), 1.35 (s, 9H);  $^{13}C$  NMR (100 MHz, THF- $d_8$ )  $\delta$  27.13, 30.63, 34.91, 80.79, 100.45, 115.47, 115.52, 117.32, 126.05, 127.75, 129.15, 129.01, 129.27, 133.61, 136.57, 137.02, 144.72, 145.55, 145.68; HRMS (EI)  $m/e$  calcd for  $C_{23}H_{23}NO$  329.1781, found 329.1782.

**Compound 20 (R =  $SO_2Ph$ ):**  $^1H$  NMR ( $CDCl_3$ , 400 MHz):  $\delta$  7.61-7.57 (m, 2H), 7.52 (d,  $J = 8.1$  Hz, 1H), 7.43-7.38 (m, 2H), 7.36 (d,  $J = 8.1$  Hz, 1H), 7.28-7.23 (m, 1H), 7.12-7.07 (m, 3H), 6.24 (d,  $J = 1.5$  Hz, 1H), 3.93 (s, 3H), 1.35 (s, 9H);  $^{13}C$  NMR (100 MHz,  $CDCl_3$ )  $\delta$  35.3, 81.0, 116.3, 118.0, 119.2, 121.1, 122.3, 123.5, 123.6, 126.1, 127.1, 128.1, 128.9, 129.0, 129.6, 131.2, 134.1, 138.4, 135.8, 145.3, 148.1; HRMS (EI)  $m/e$  calcd for  $C_{25}H_{19}NO_3S$  413.1087, found 413.1090.

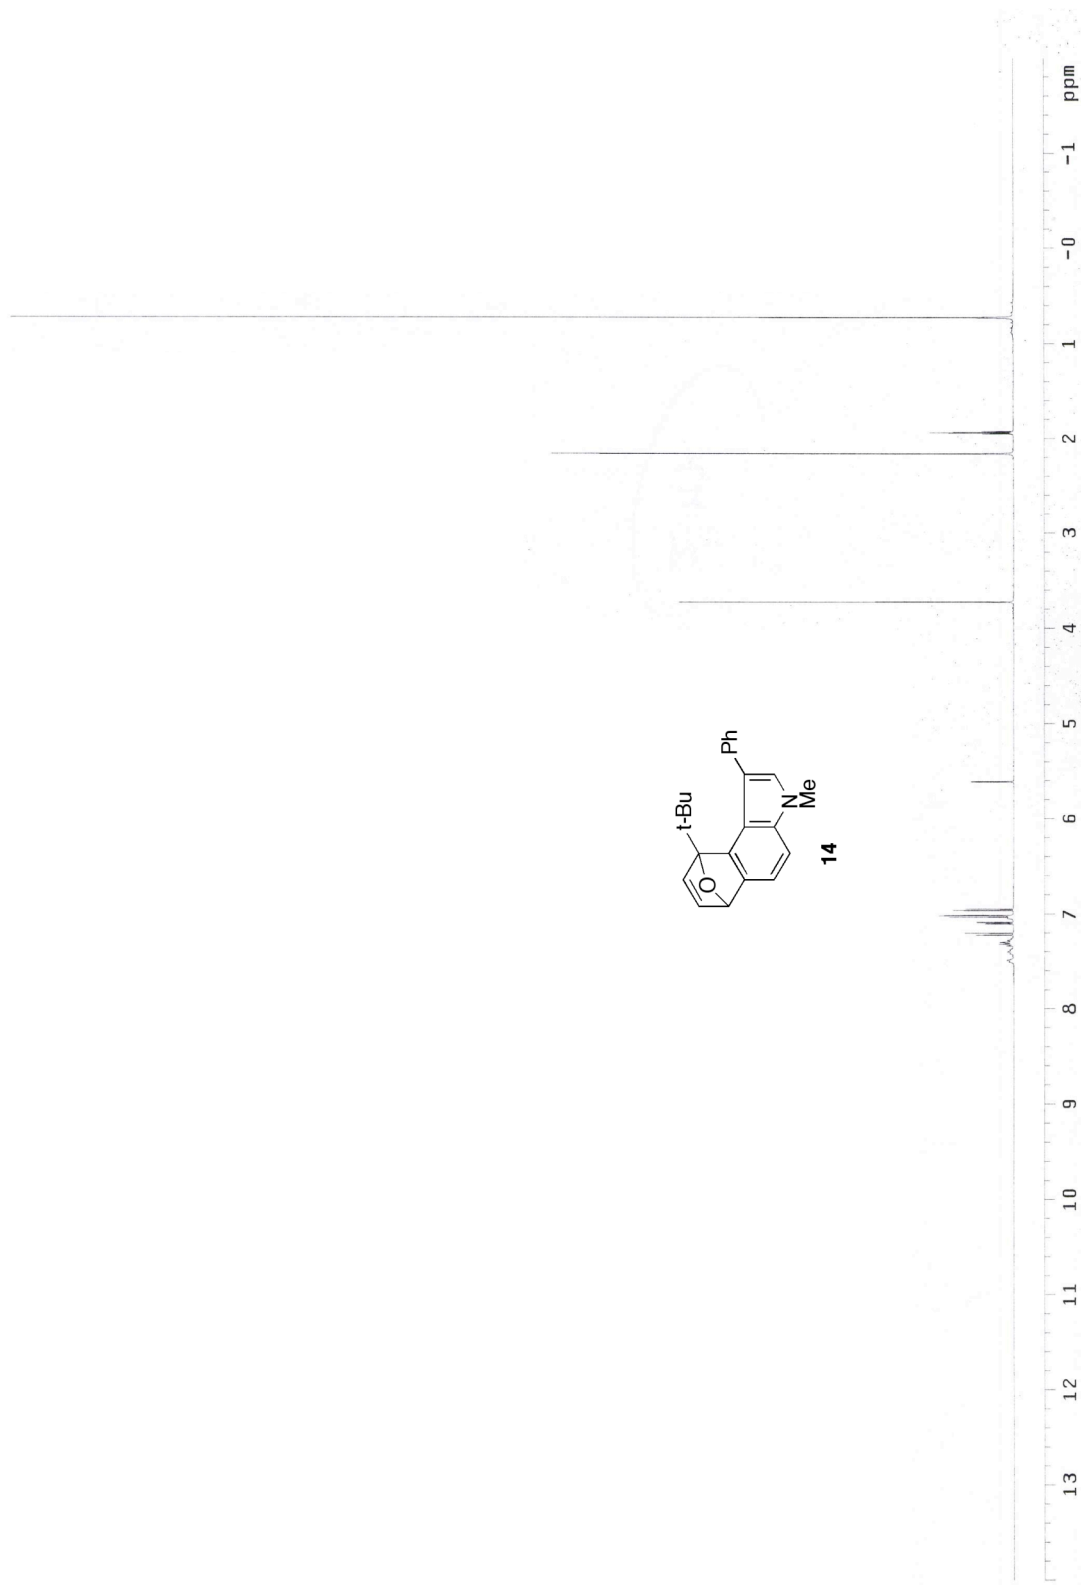

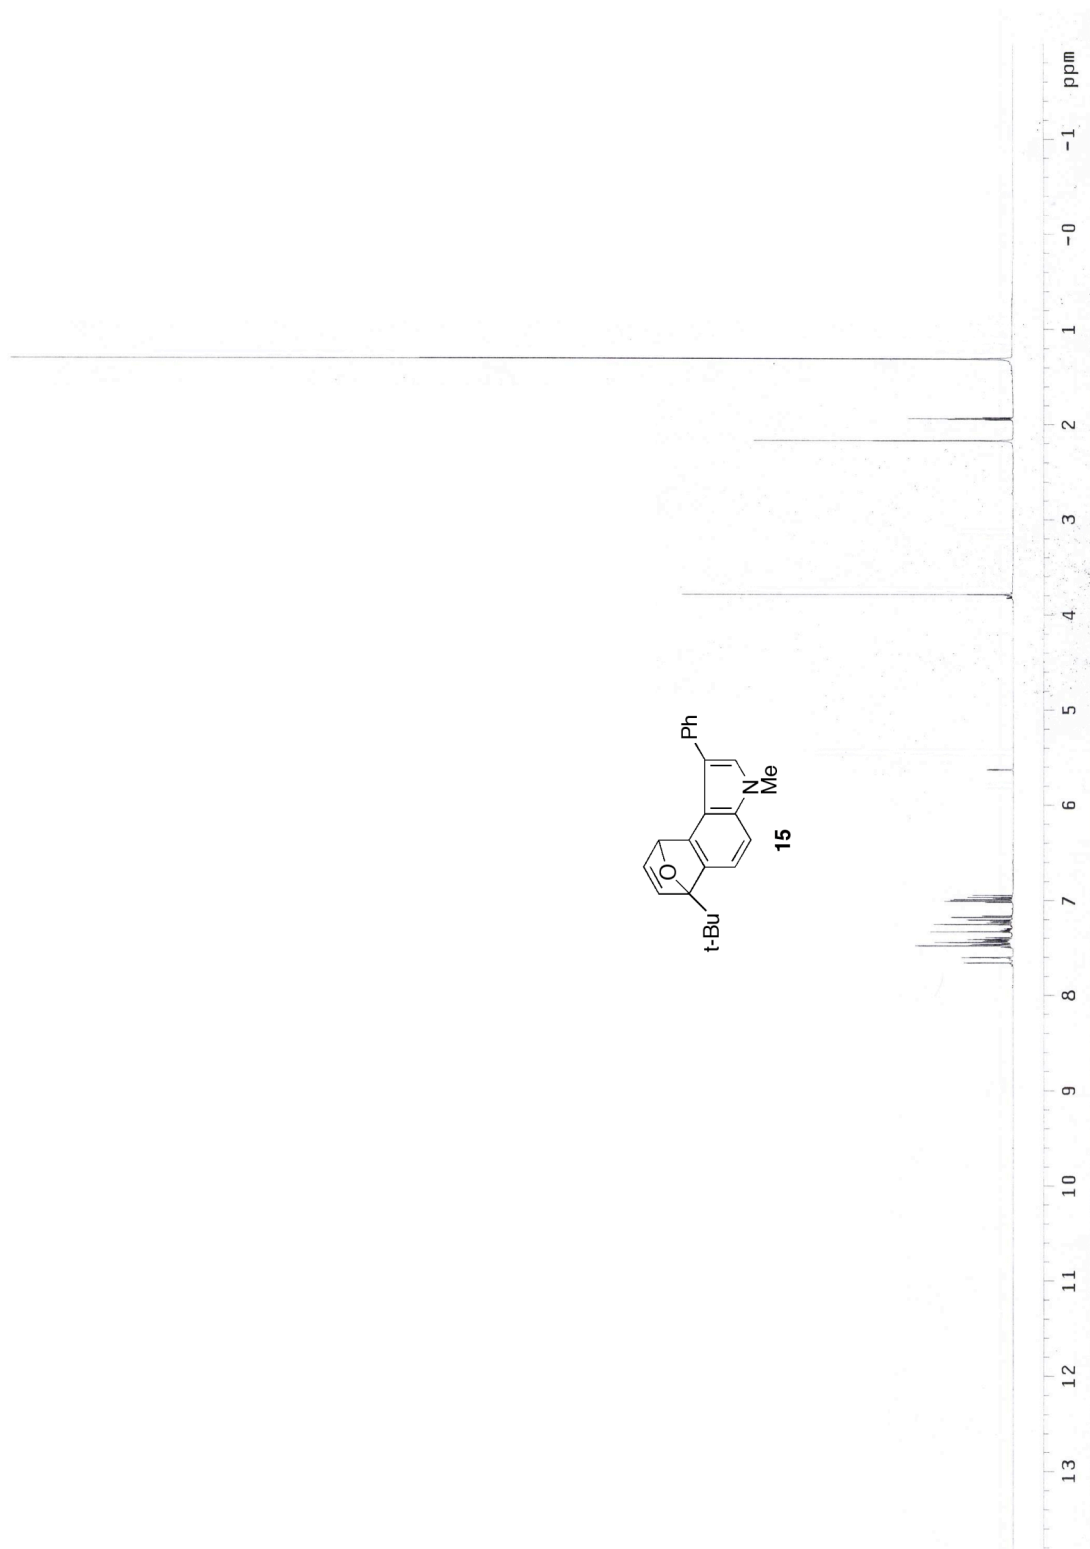

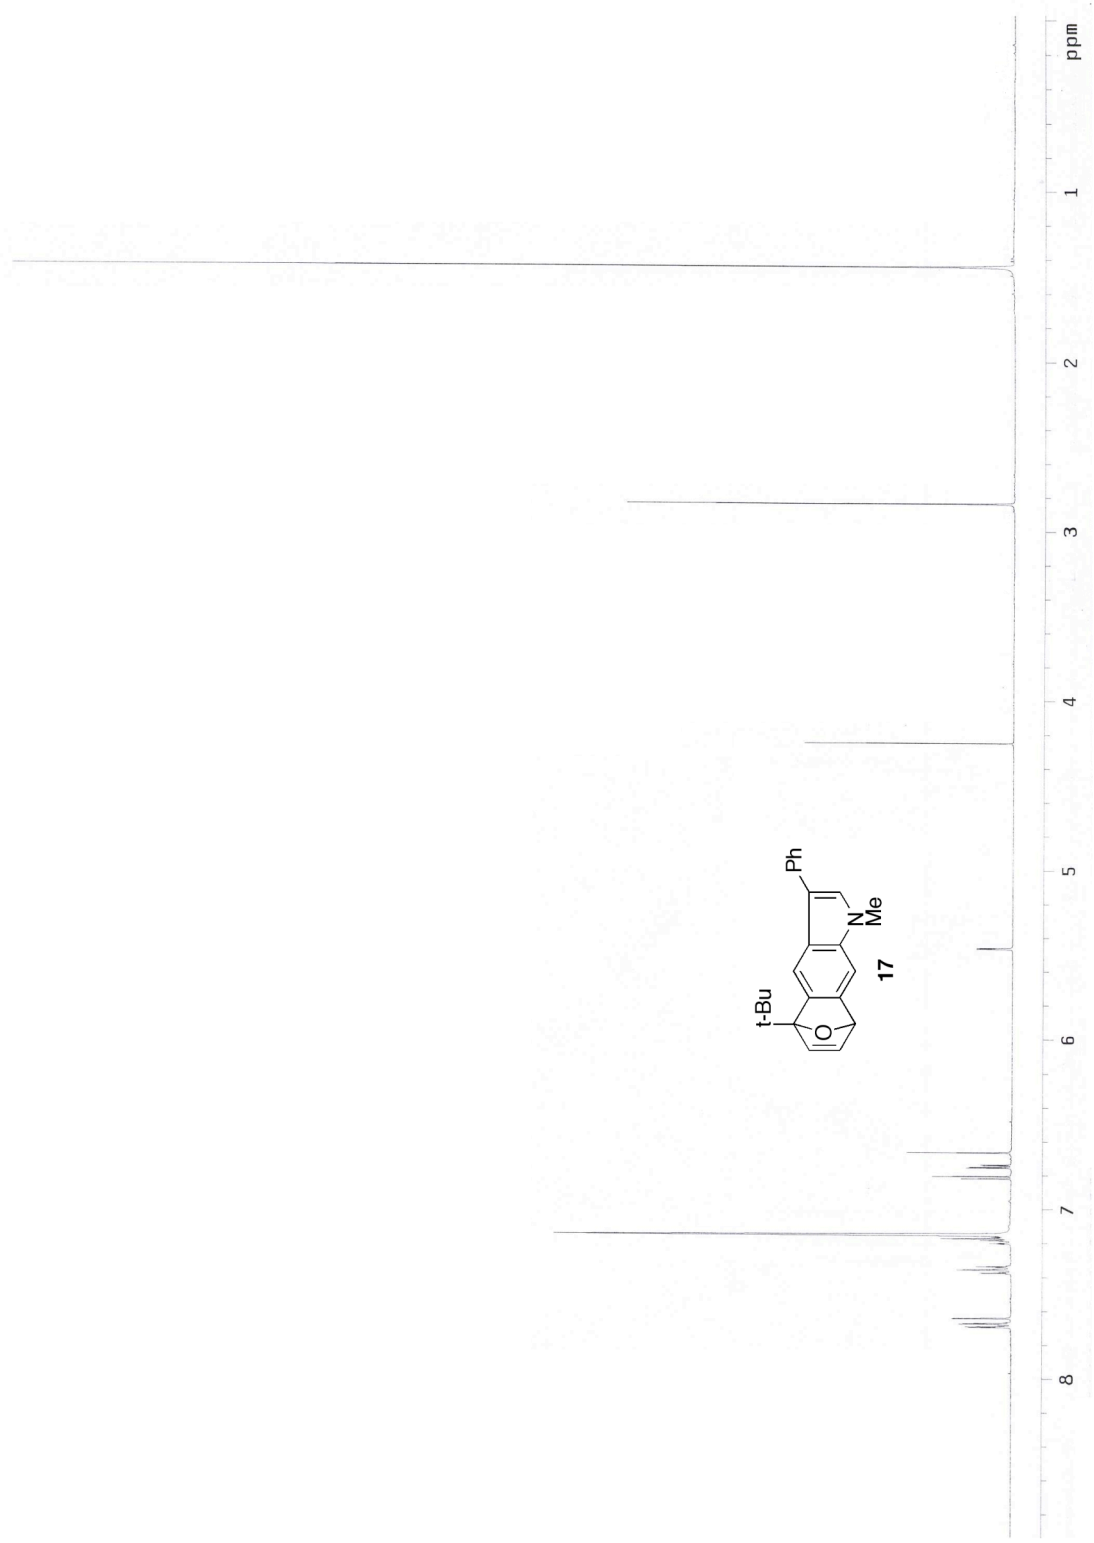



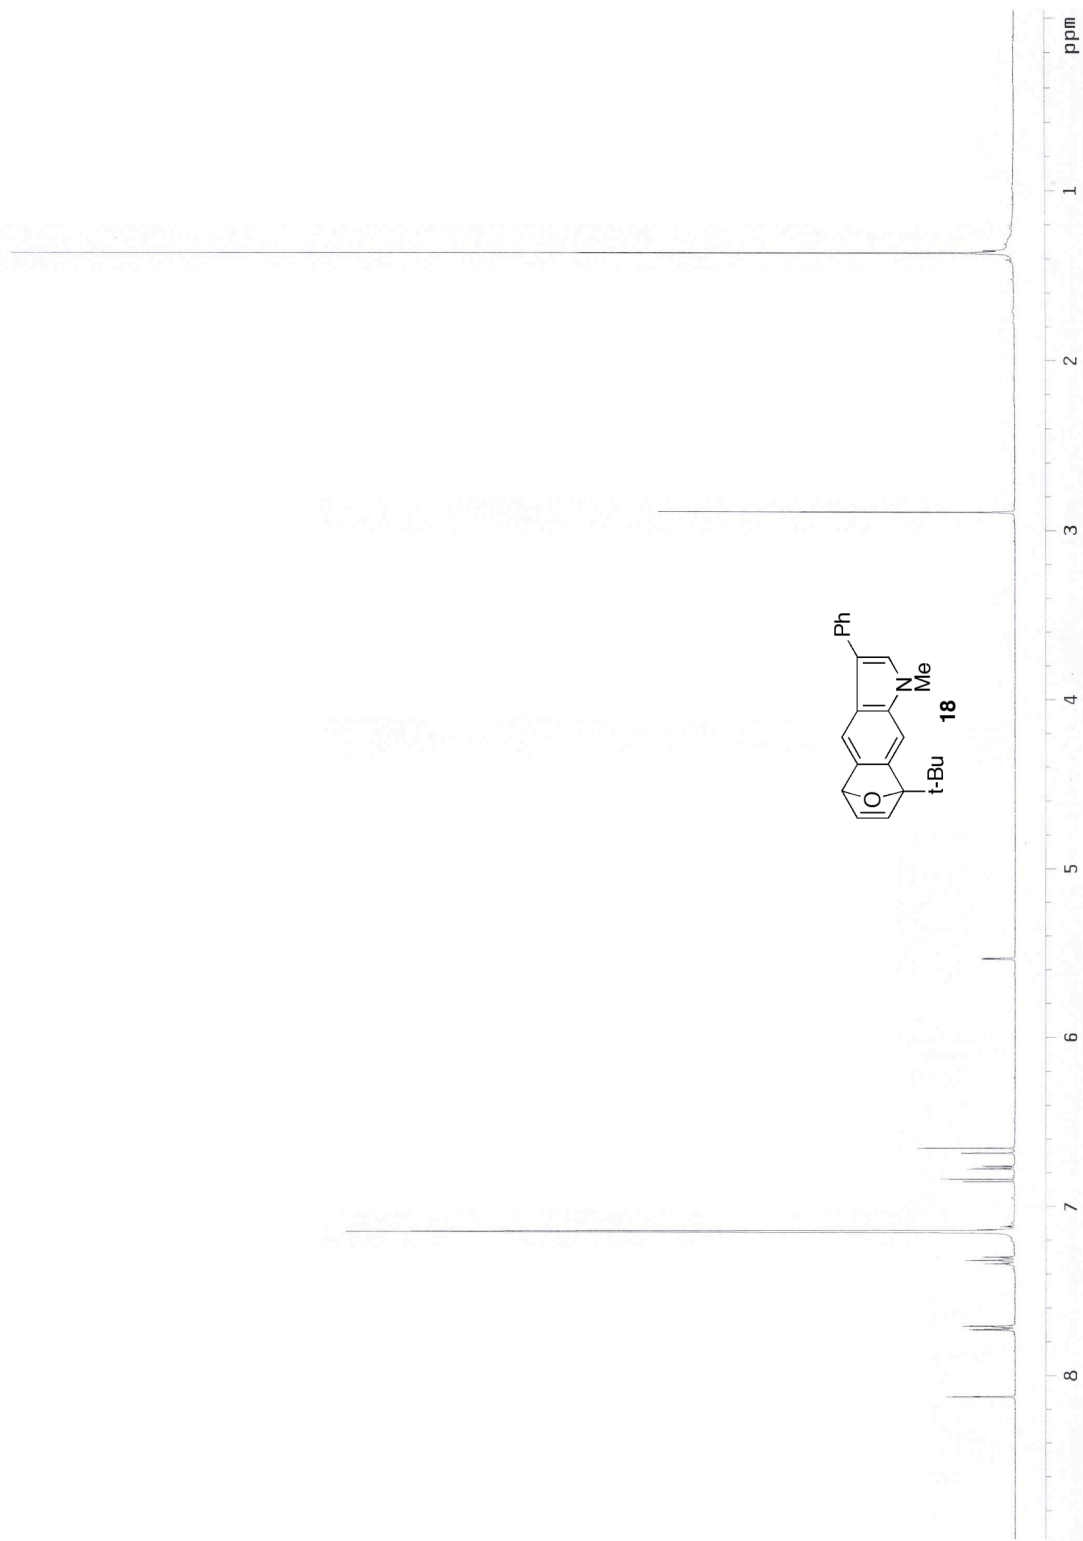

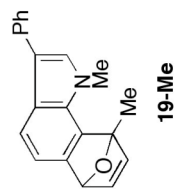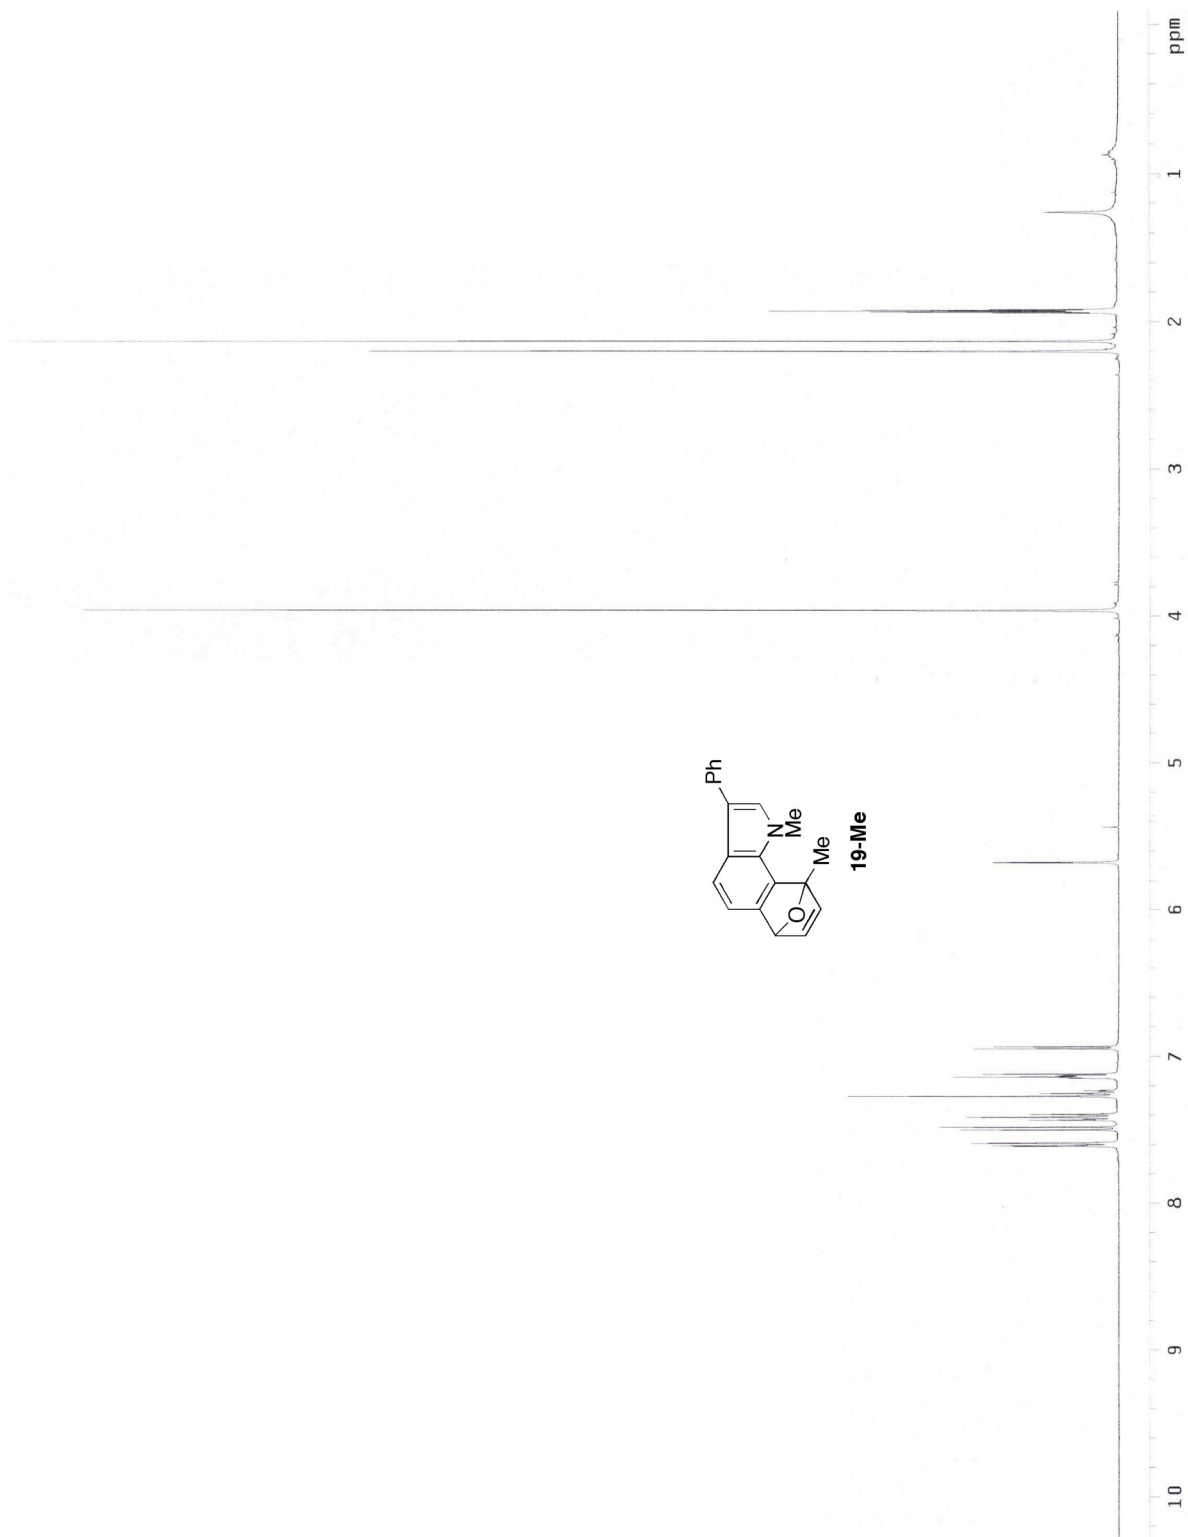

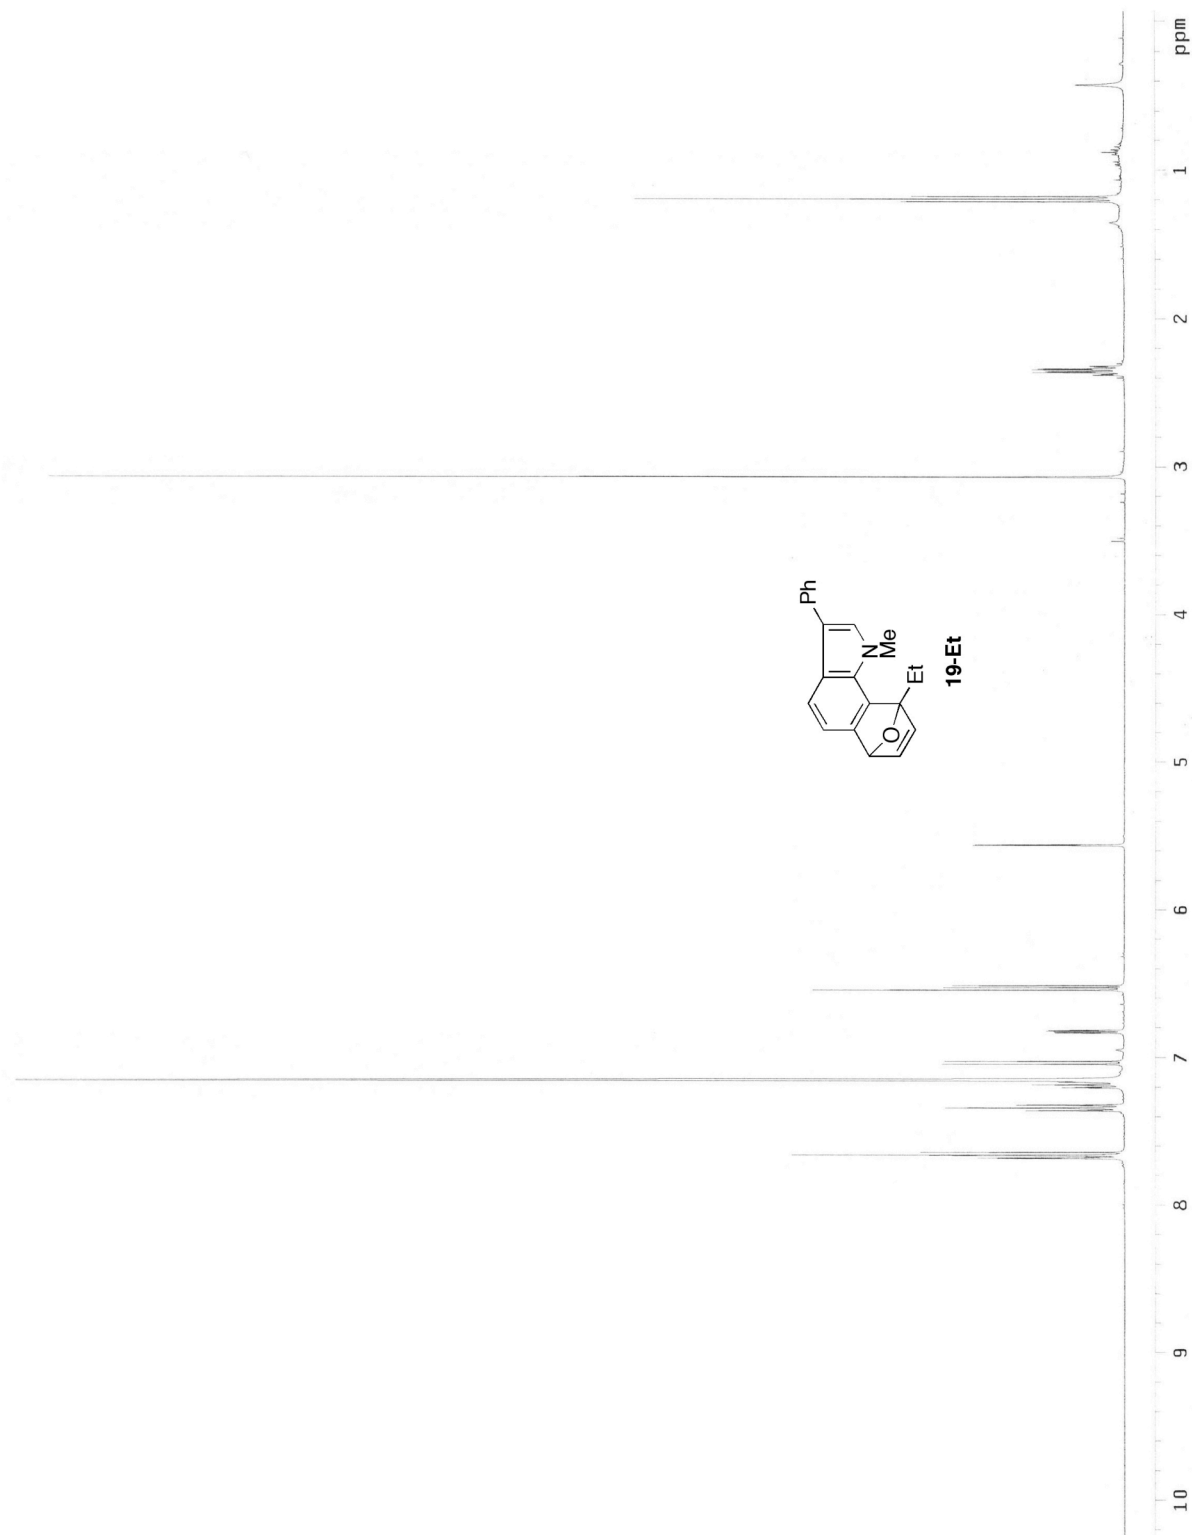

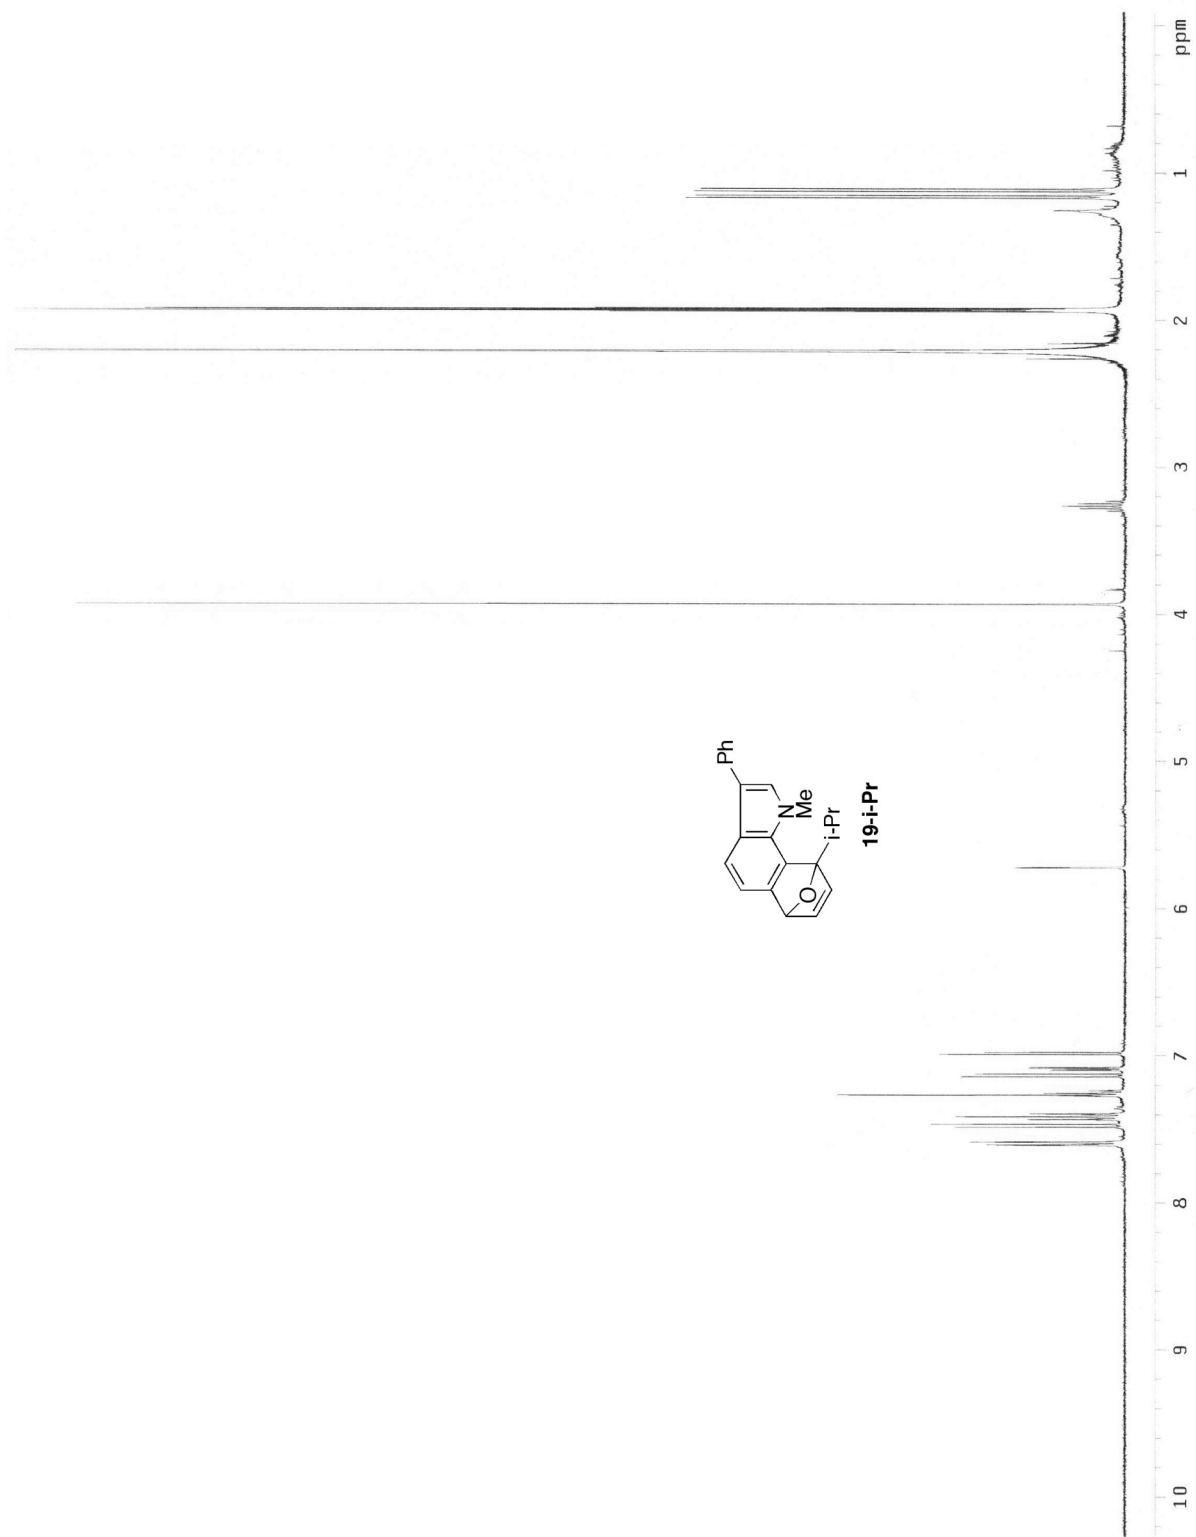

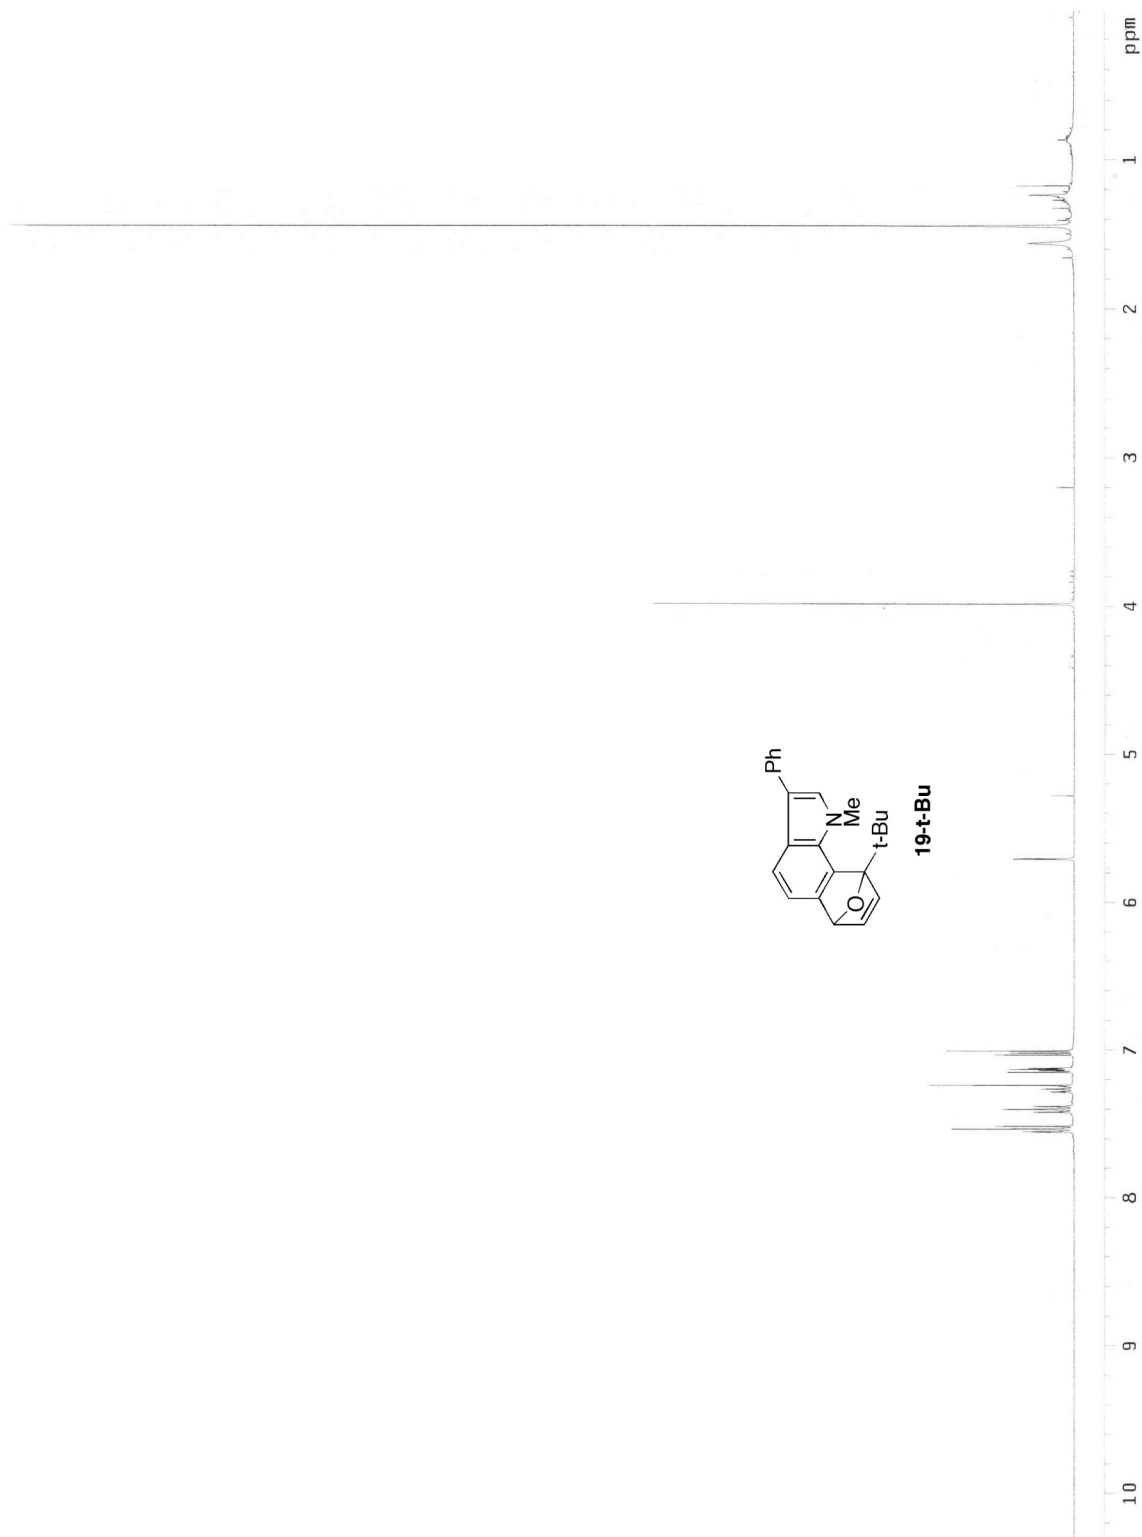

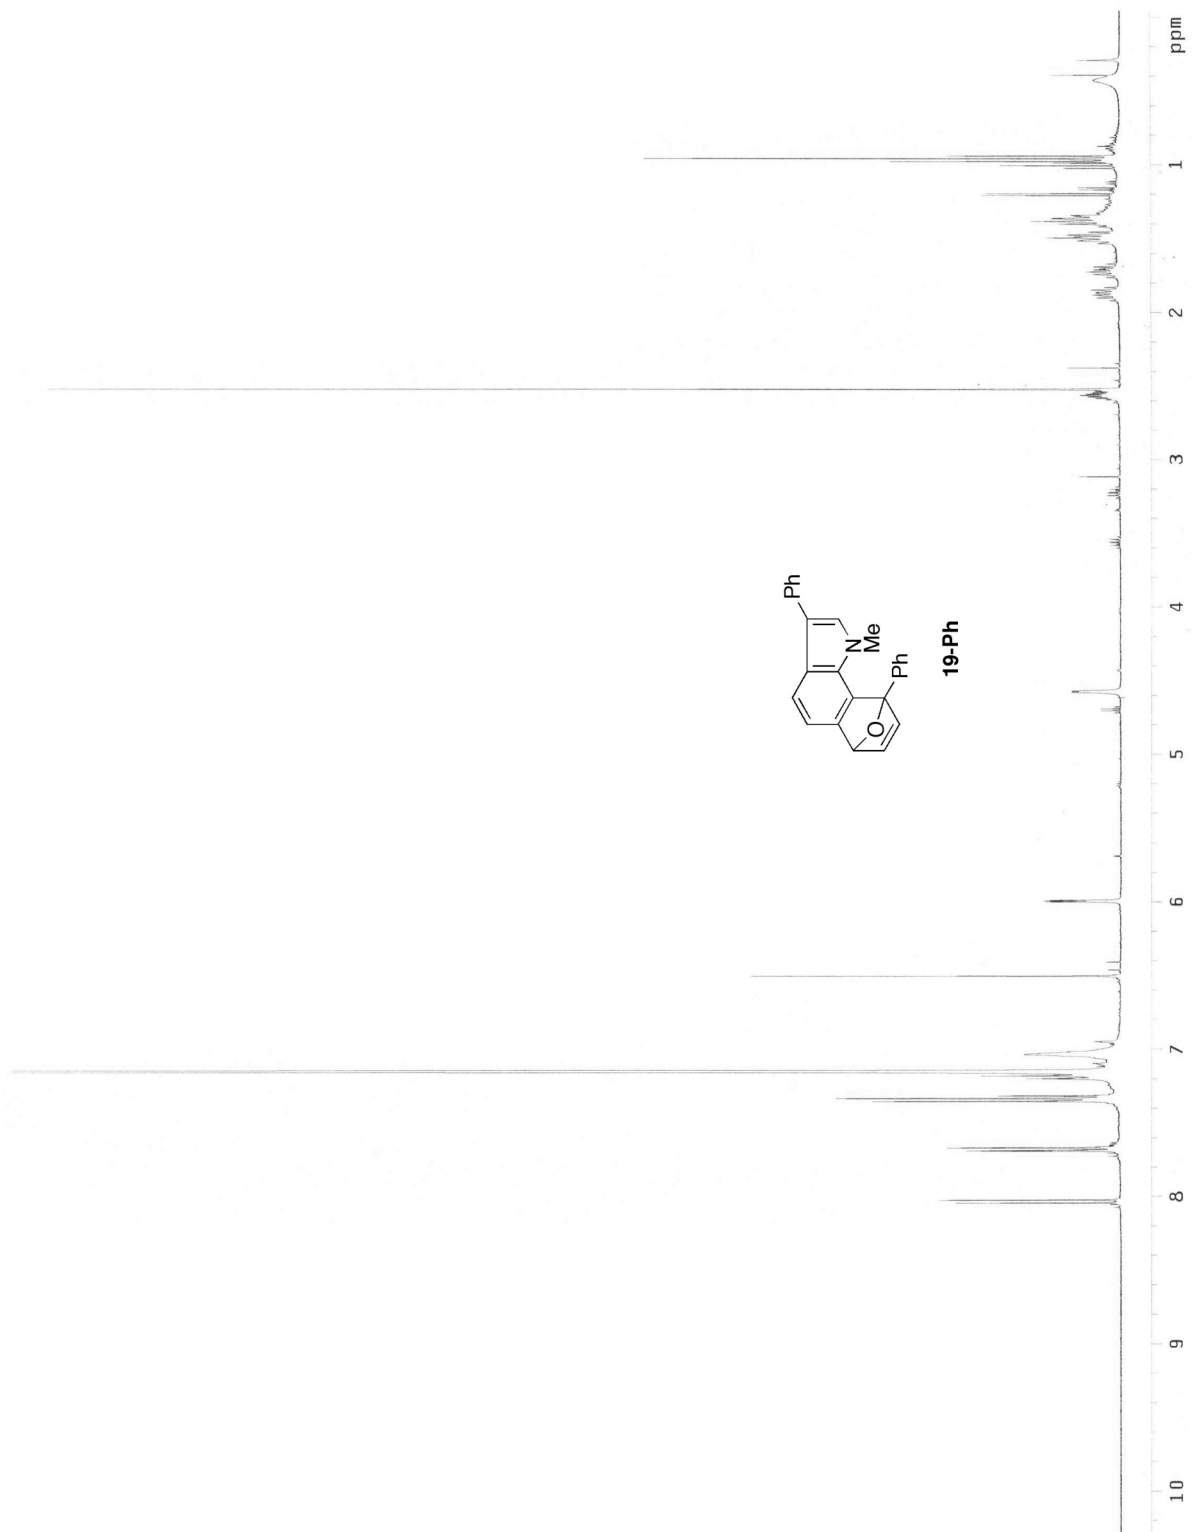

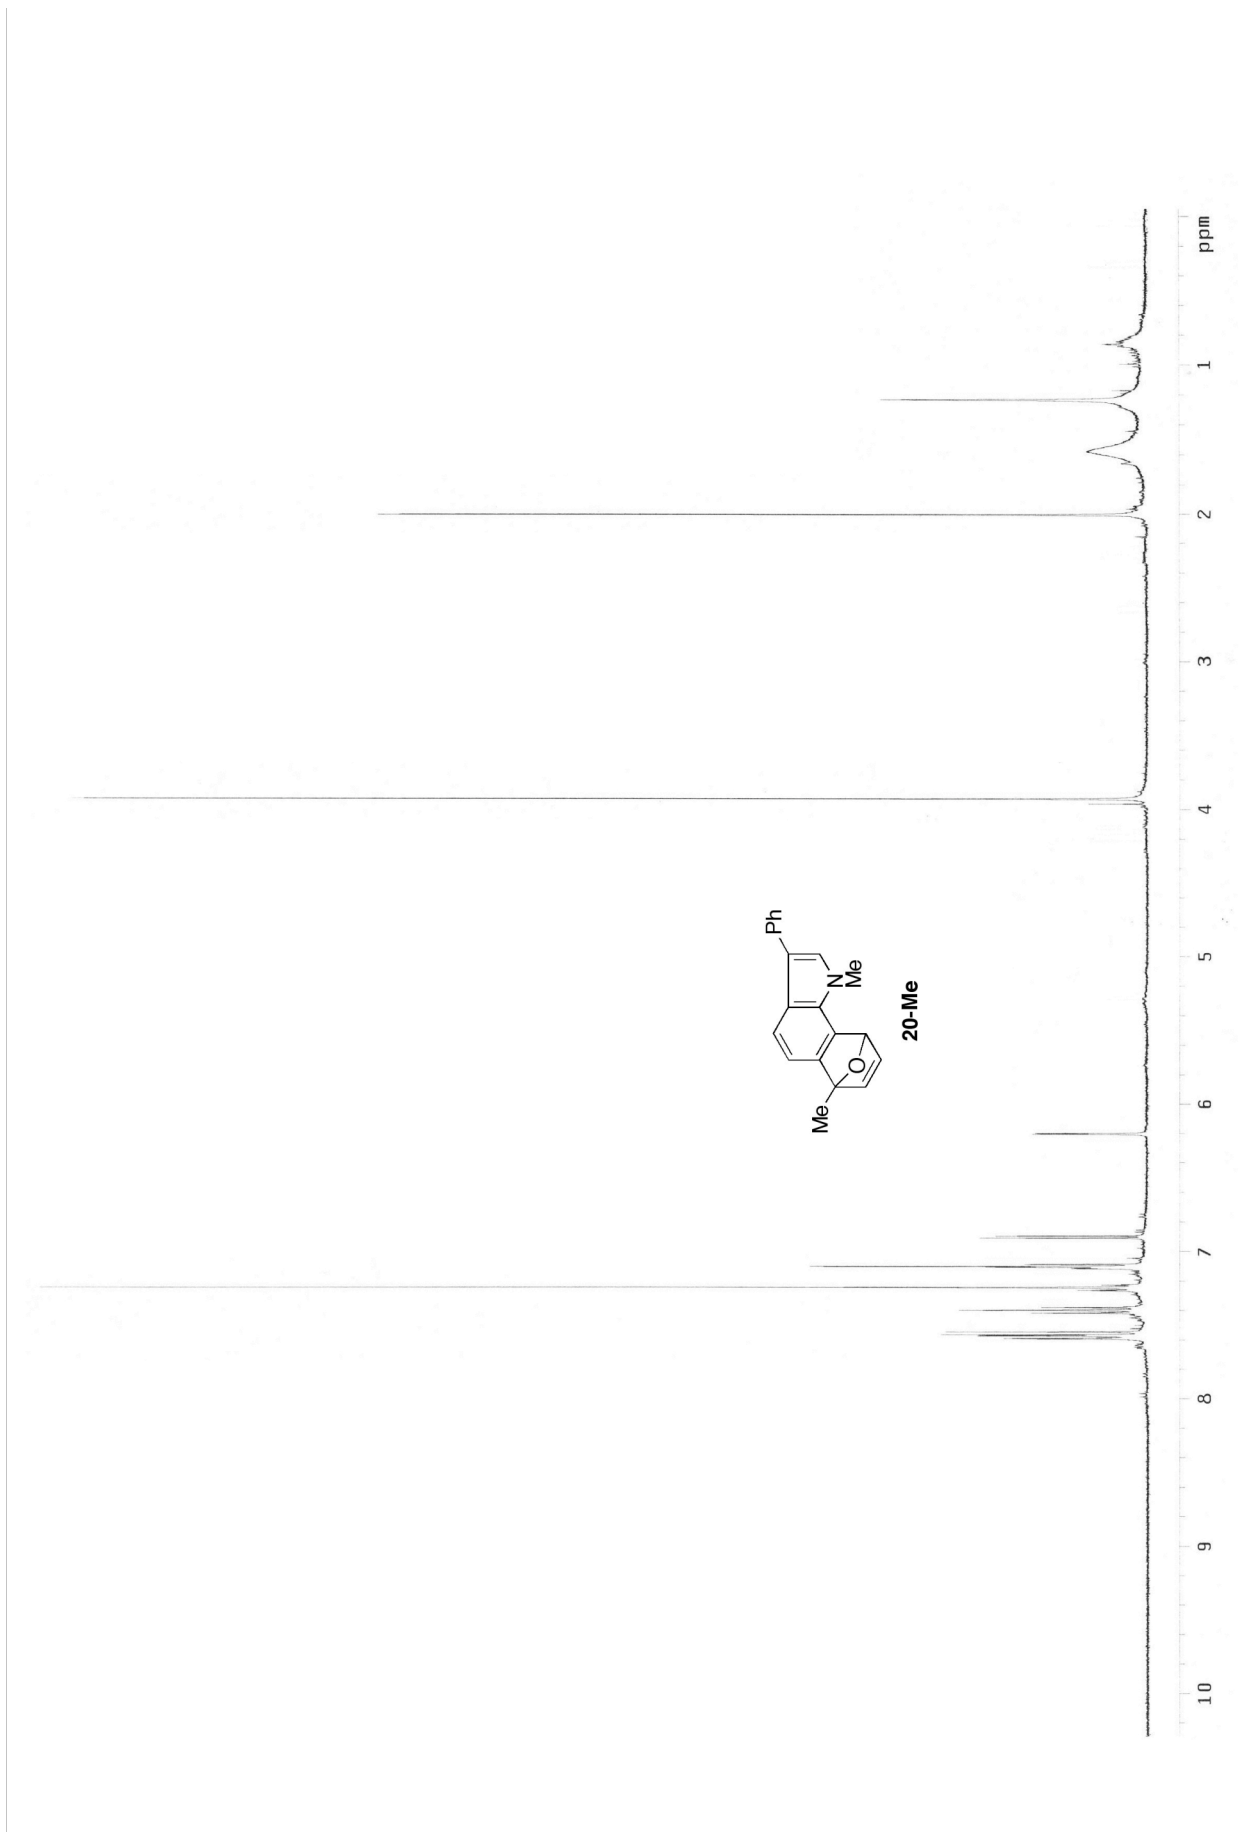

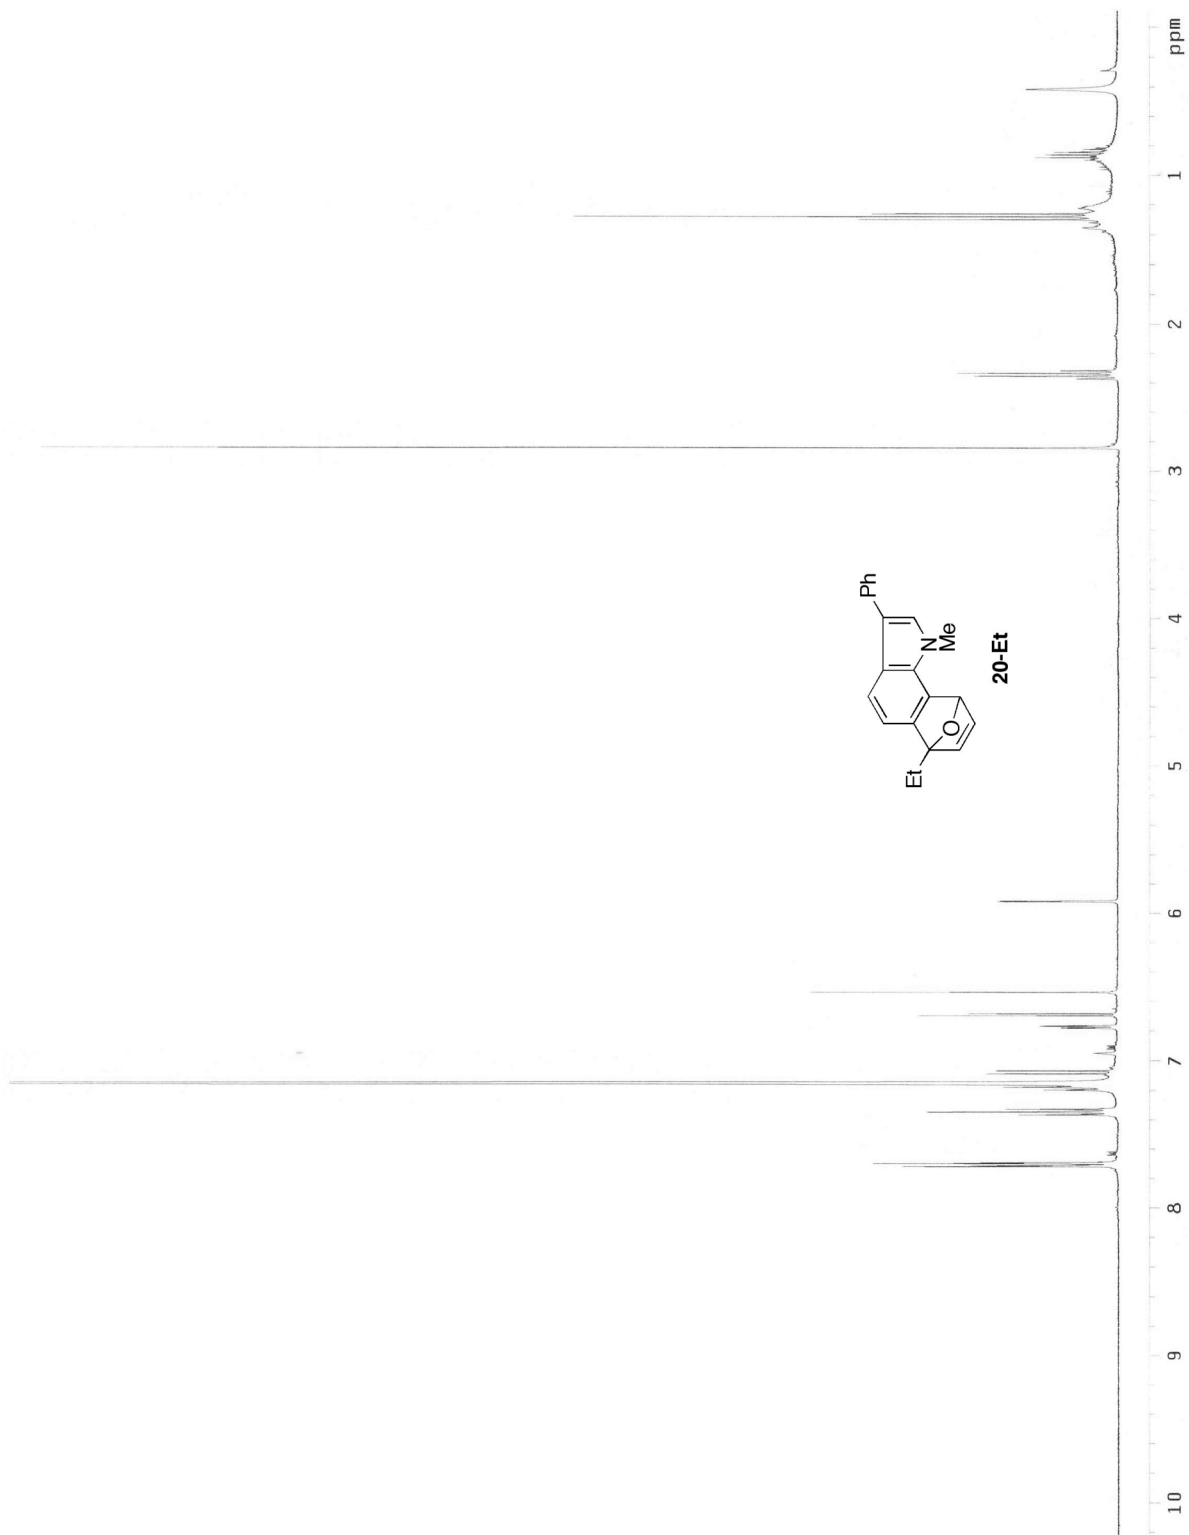



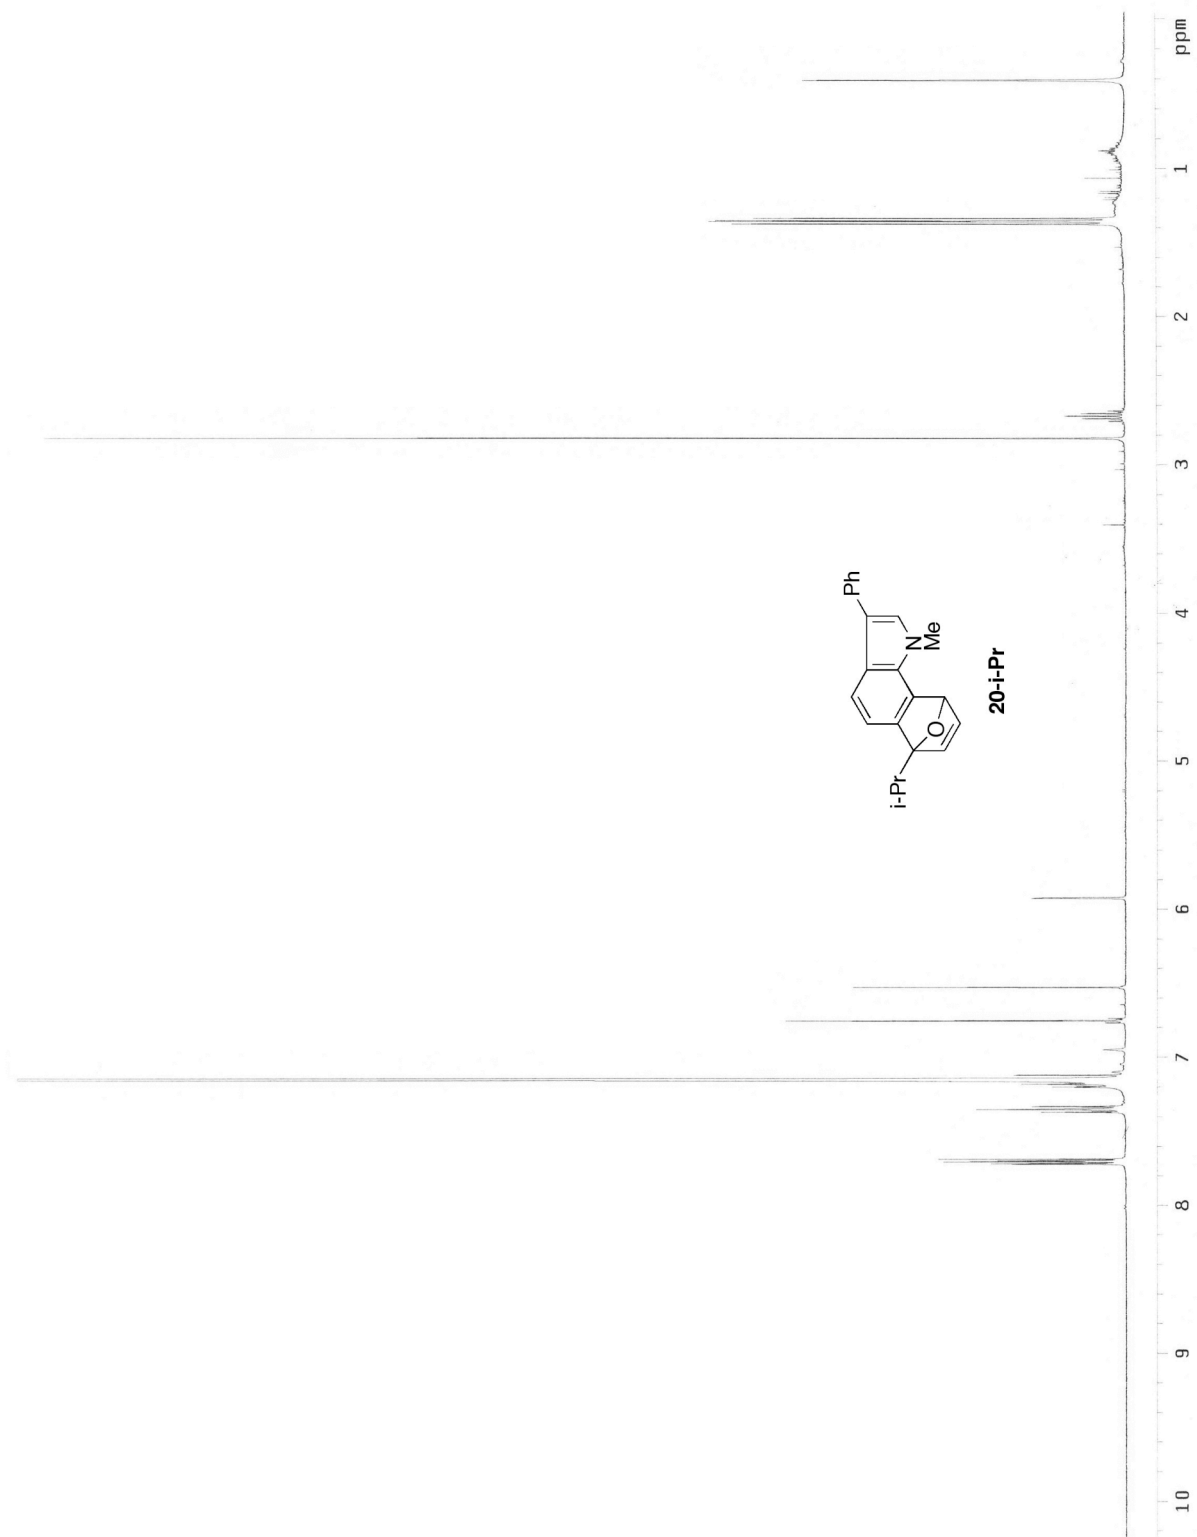

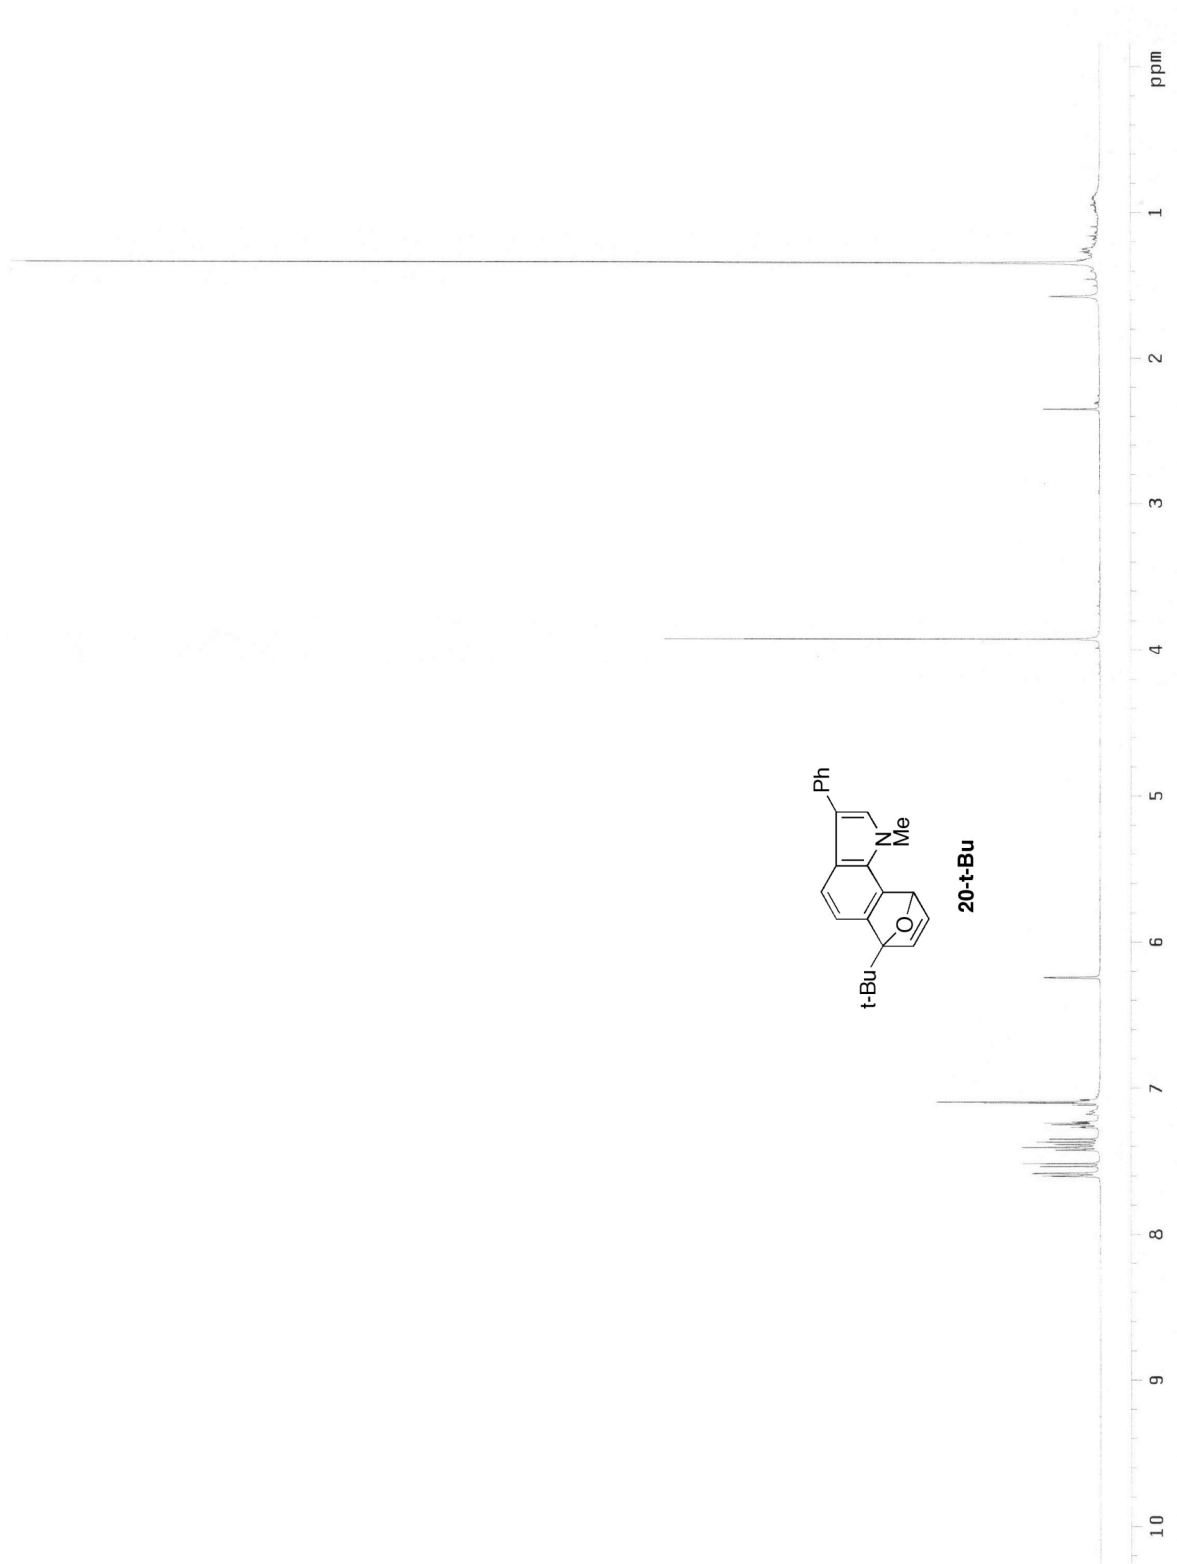

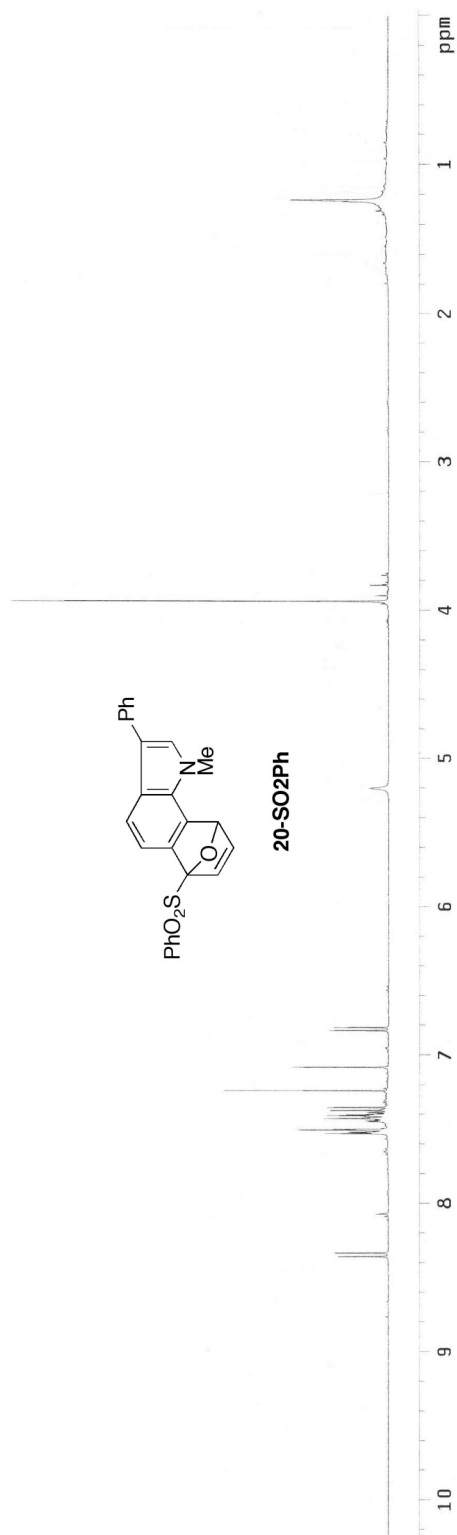

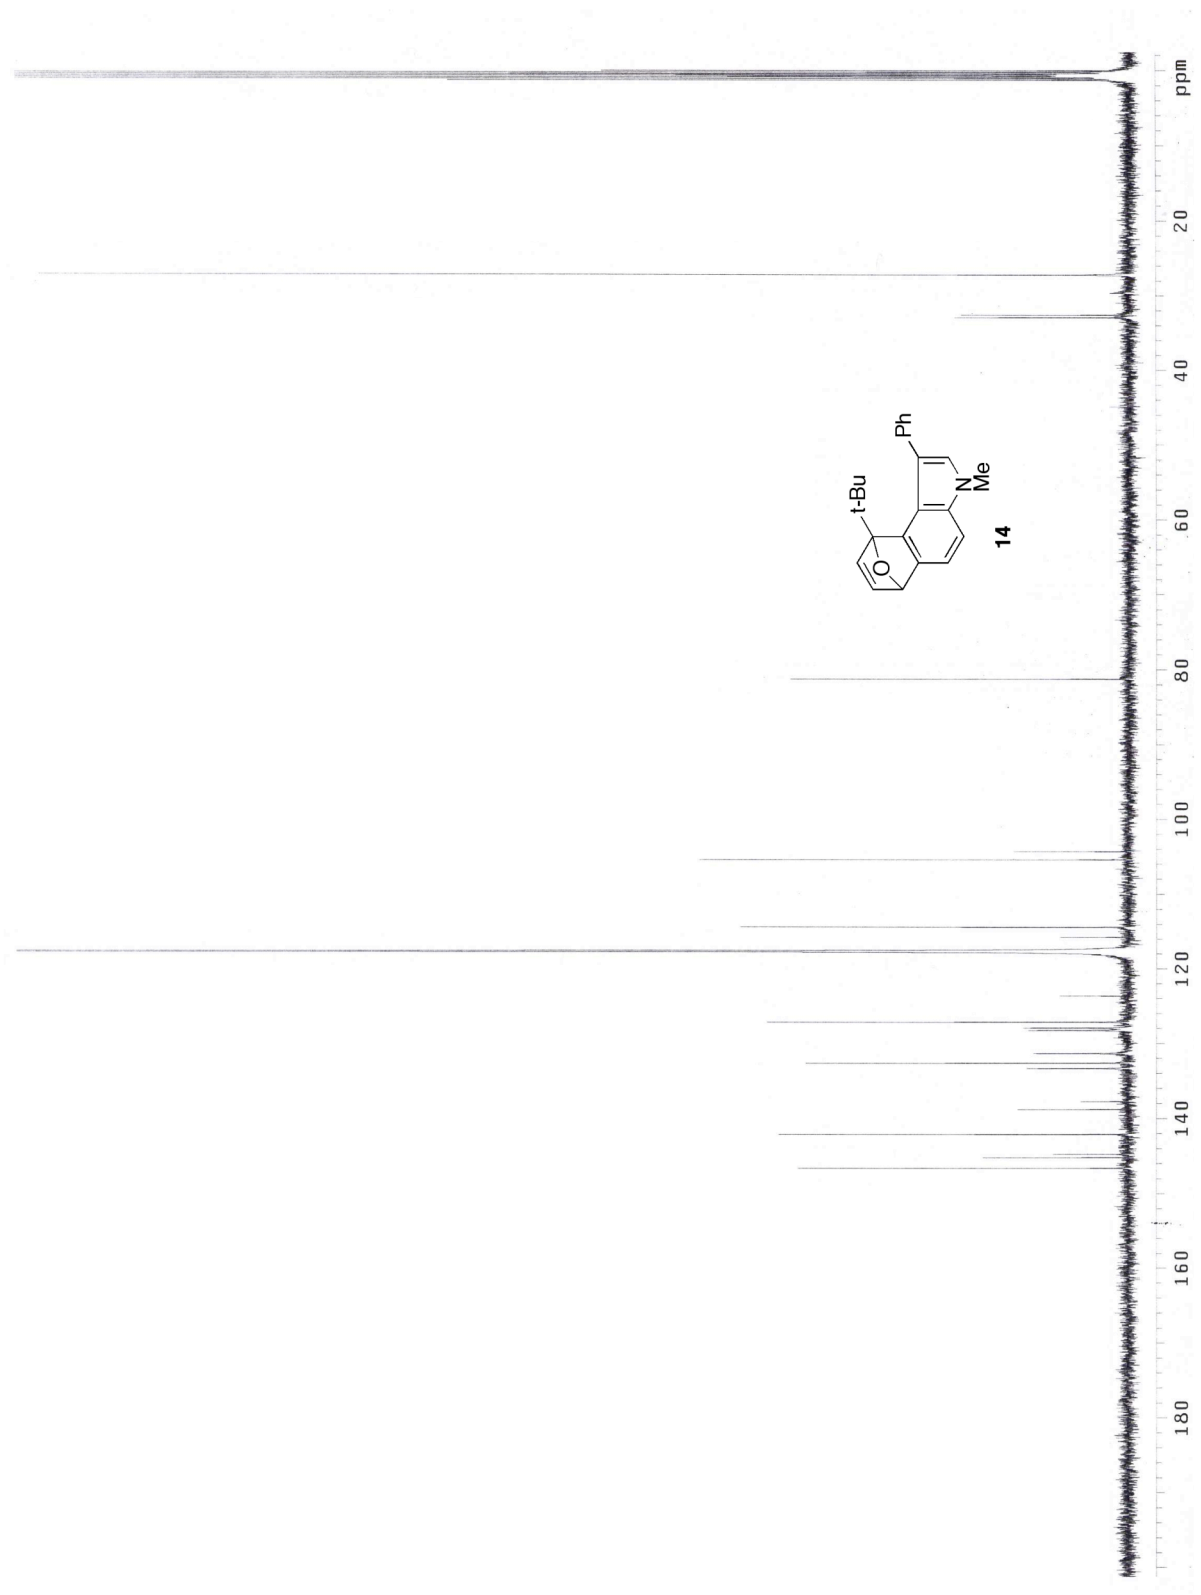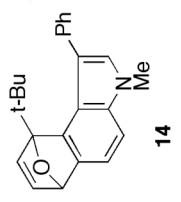

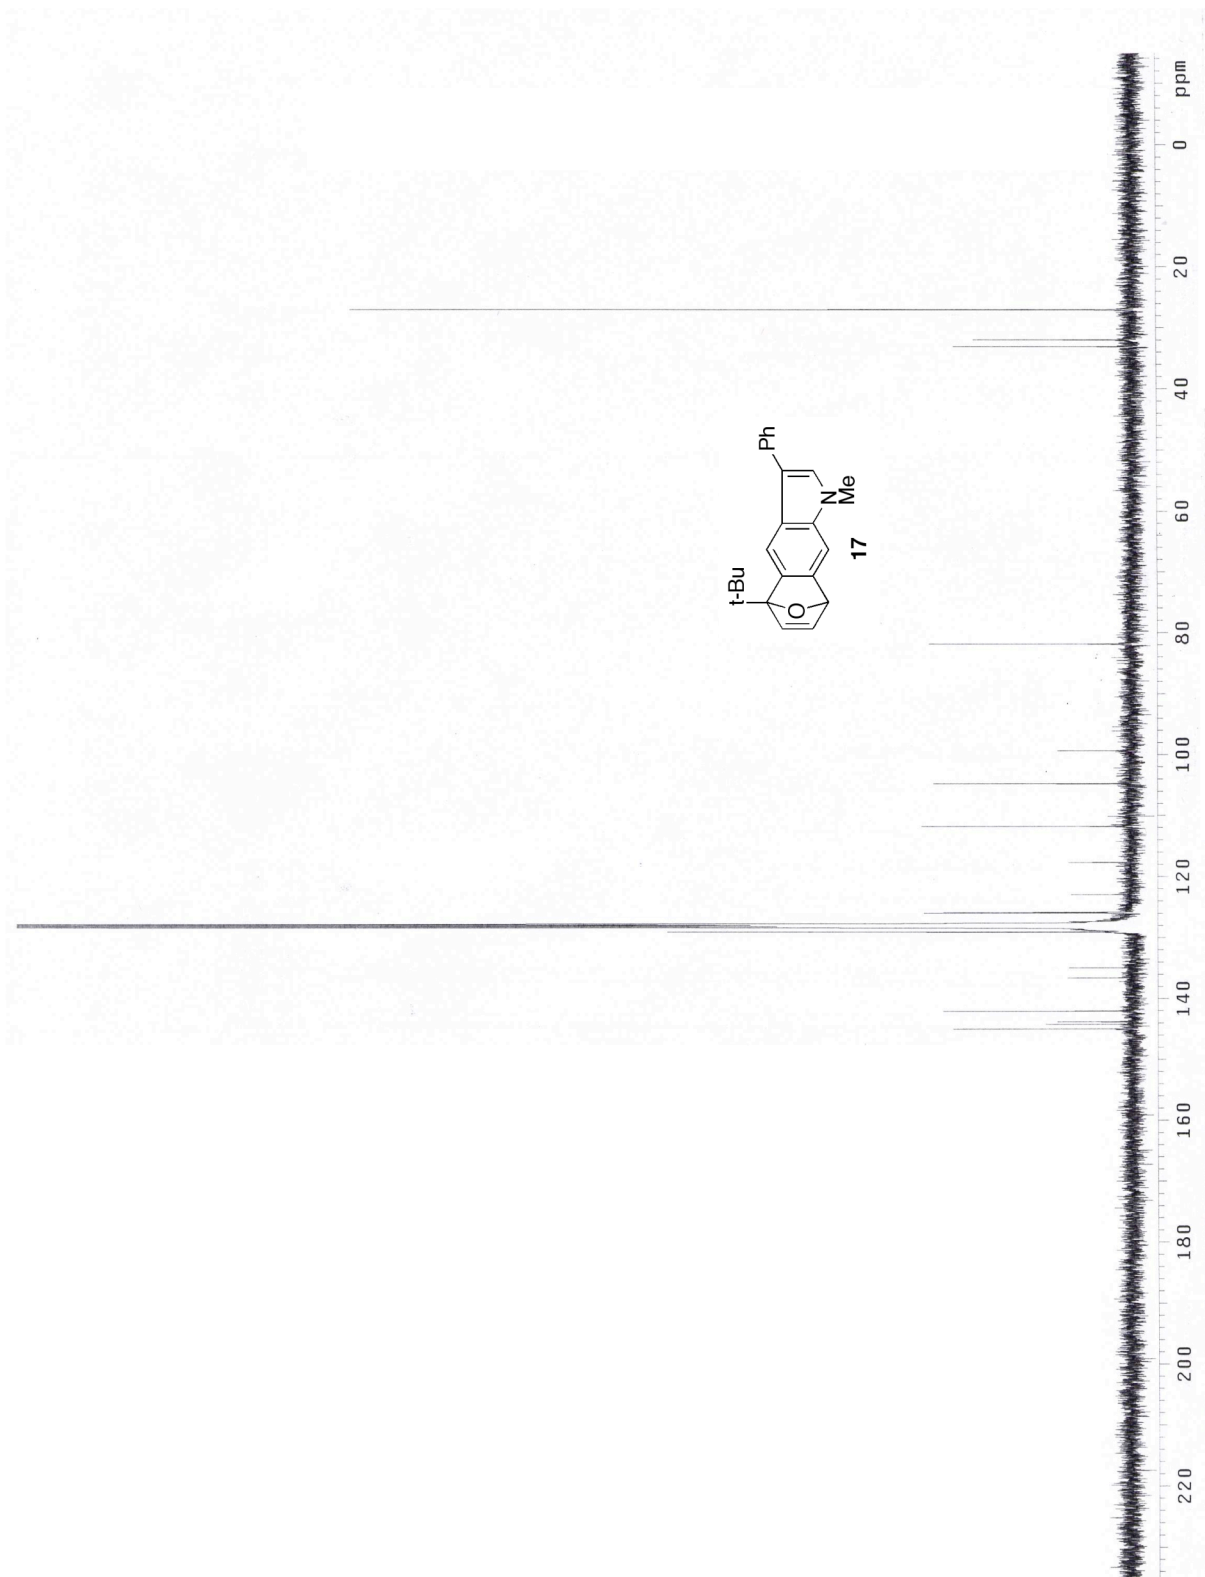

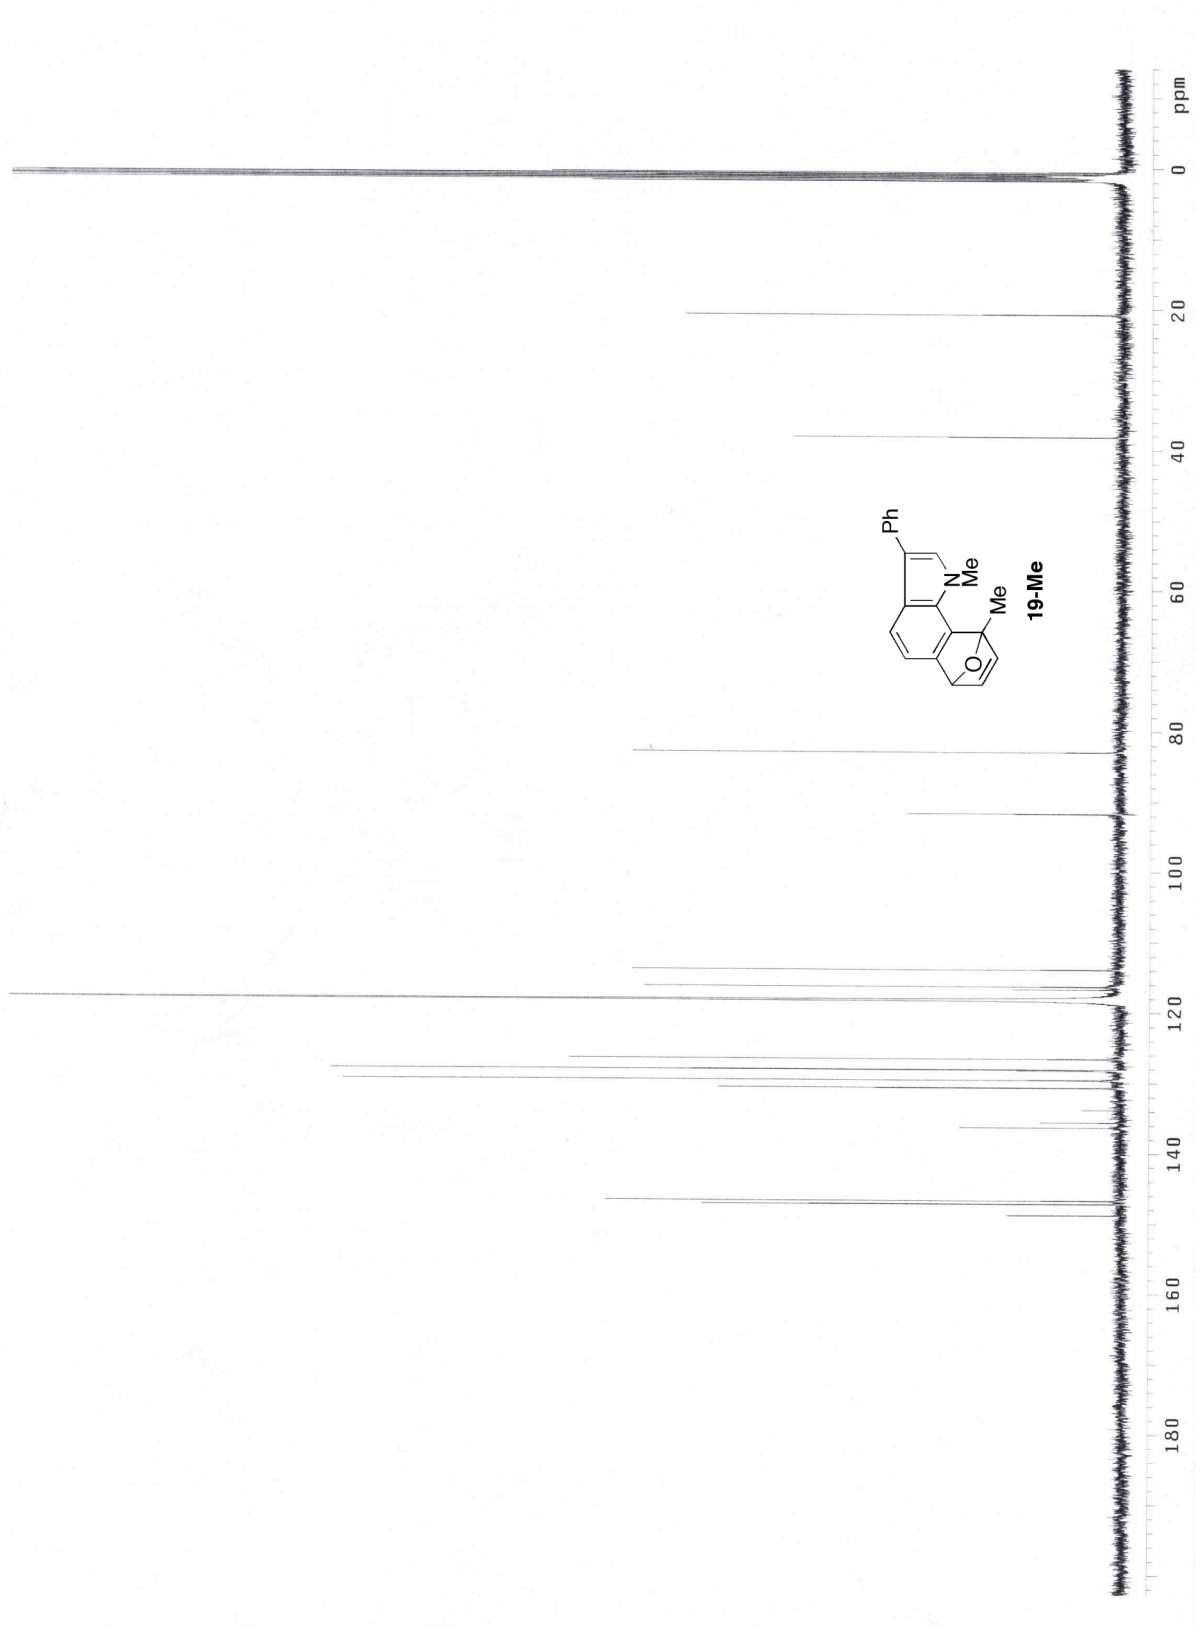

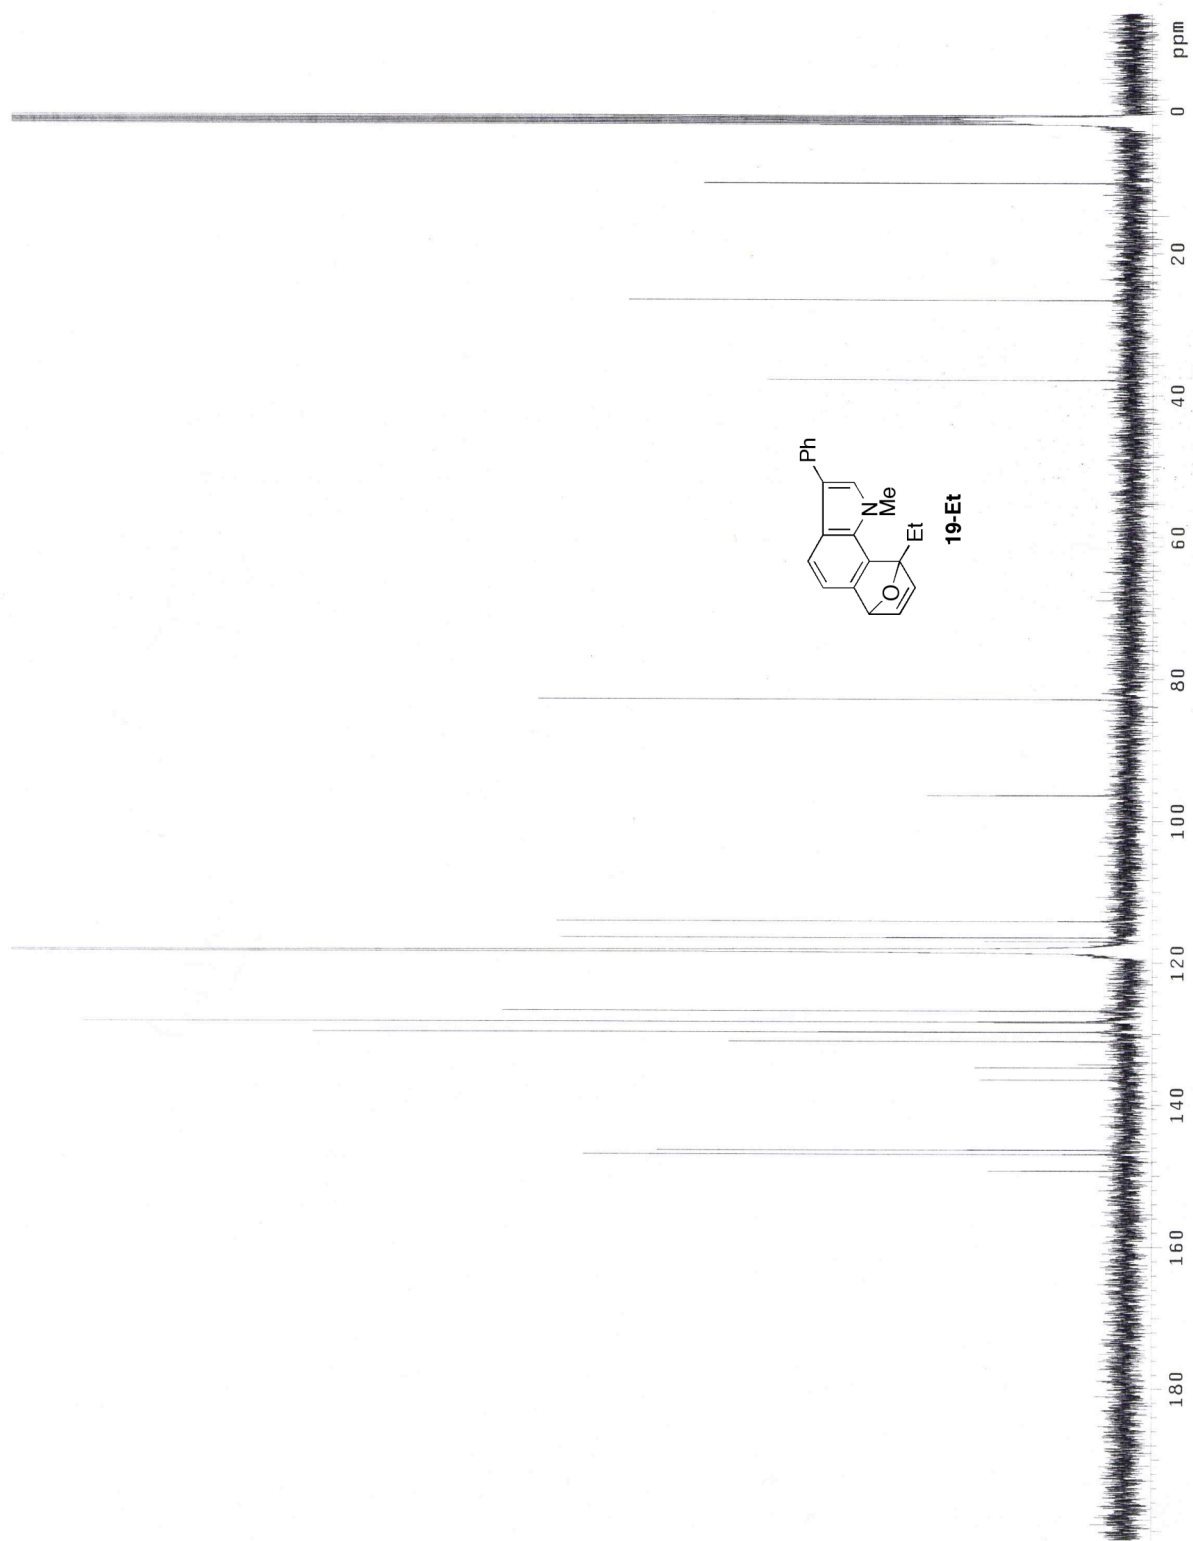

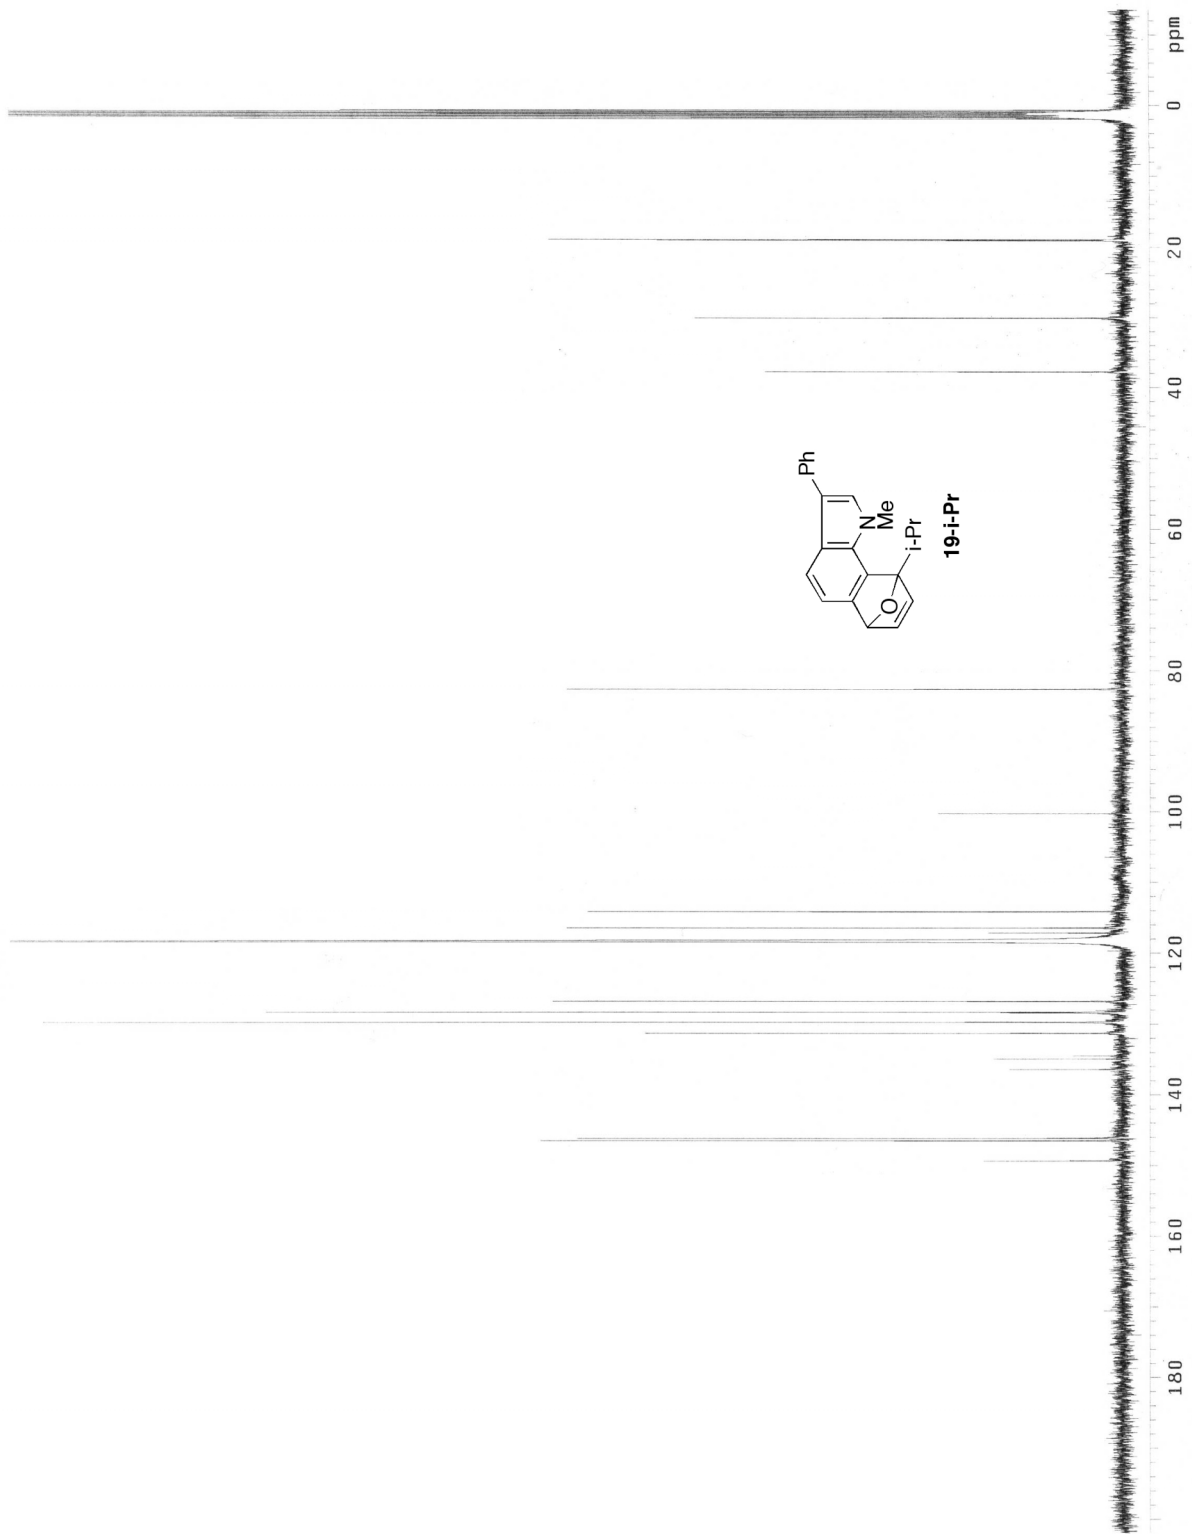



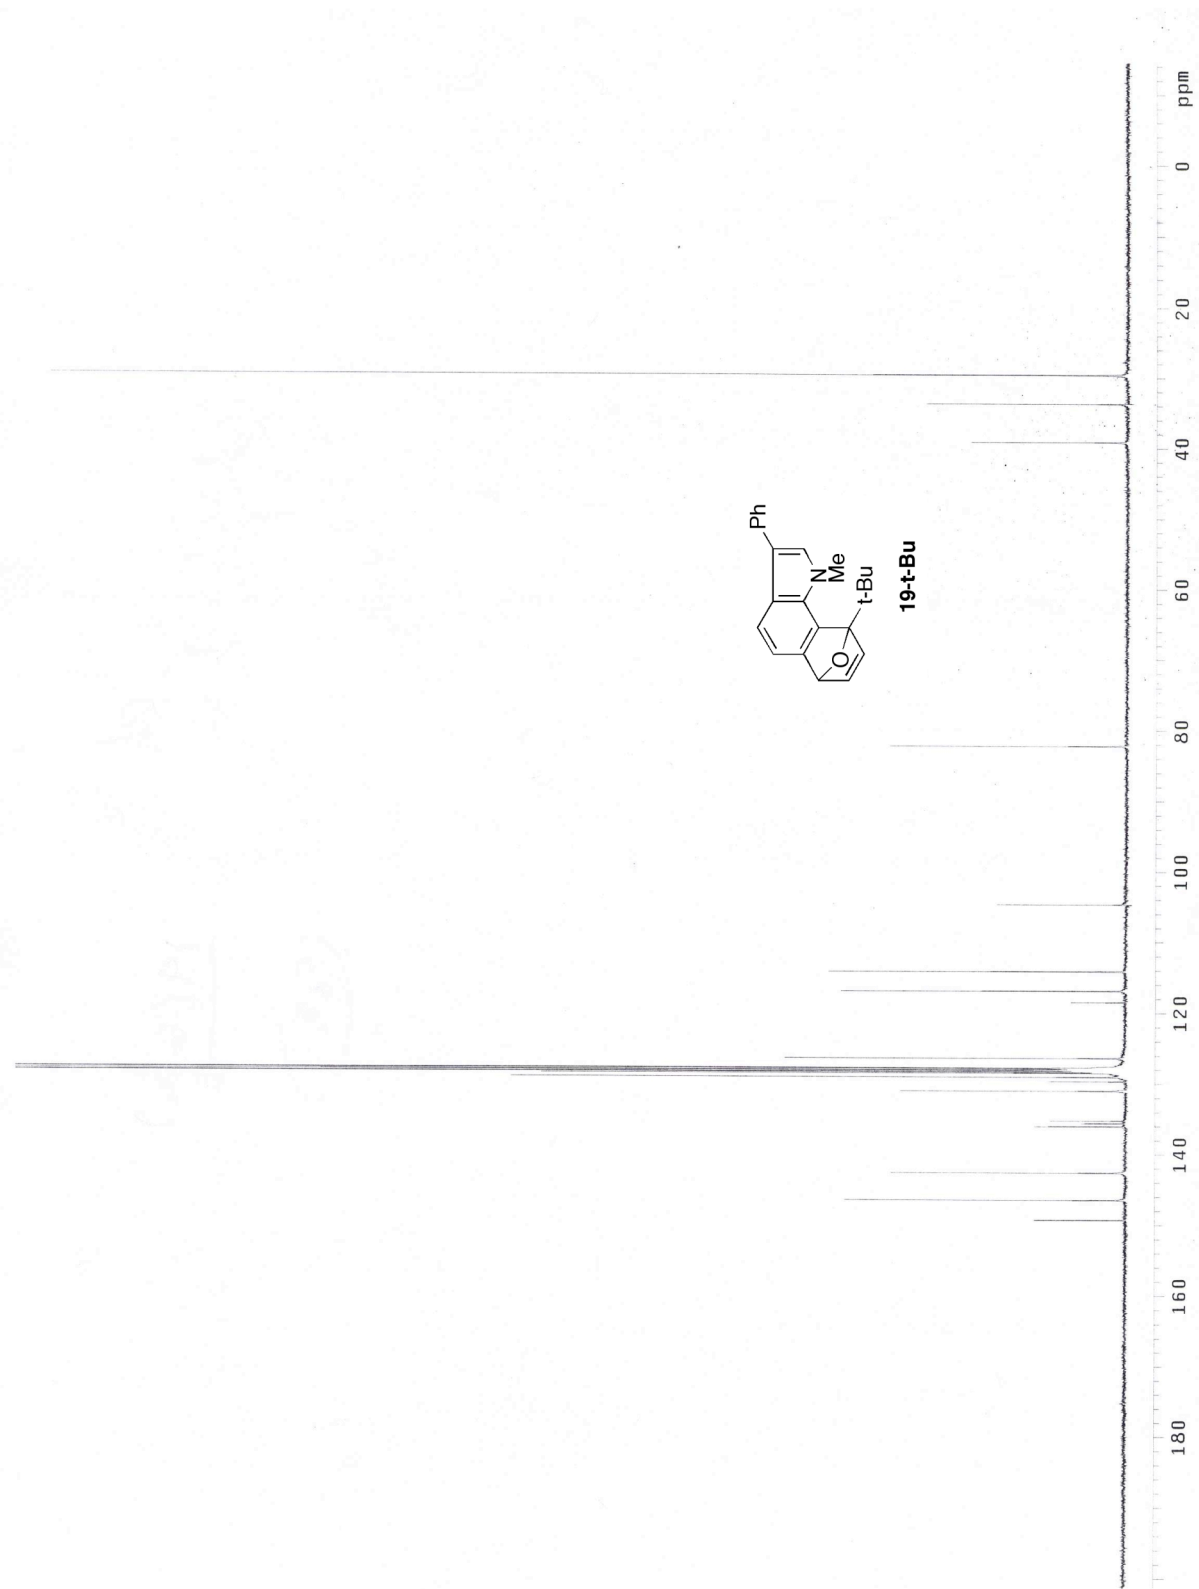

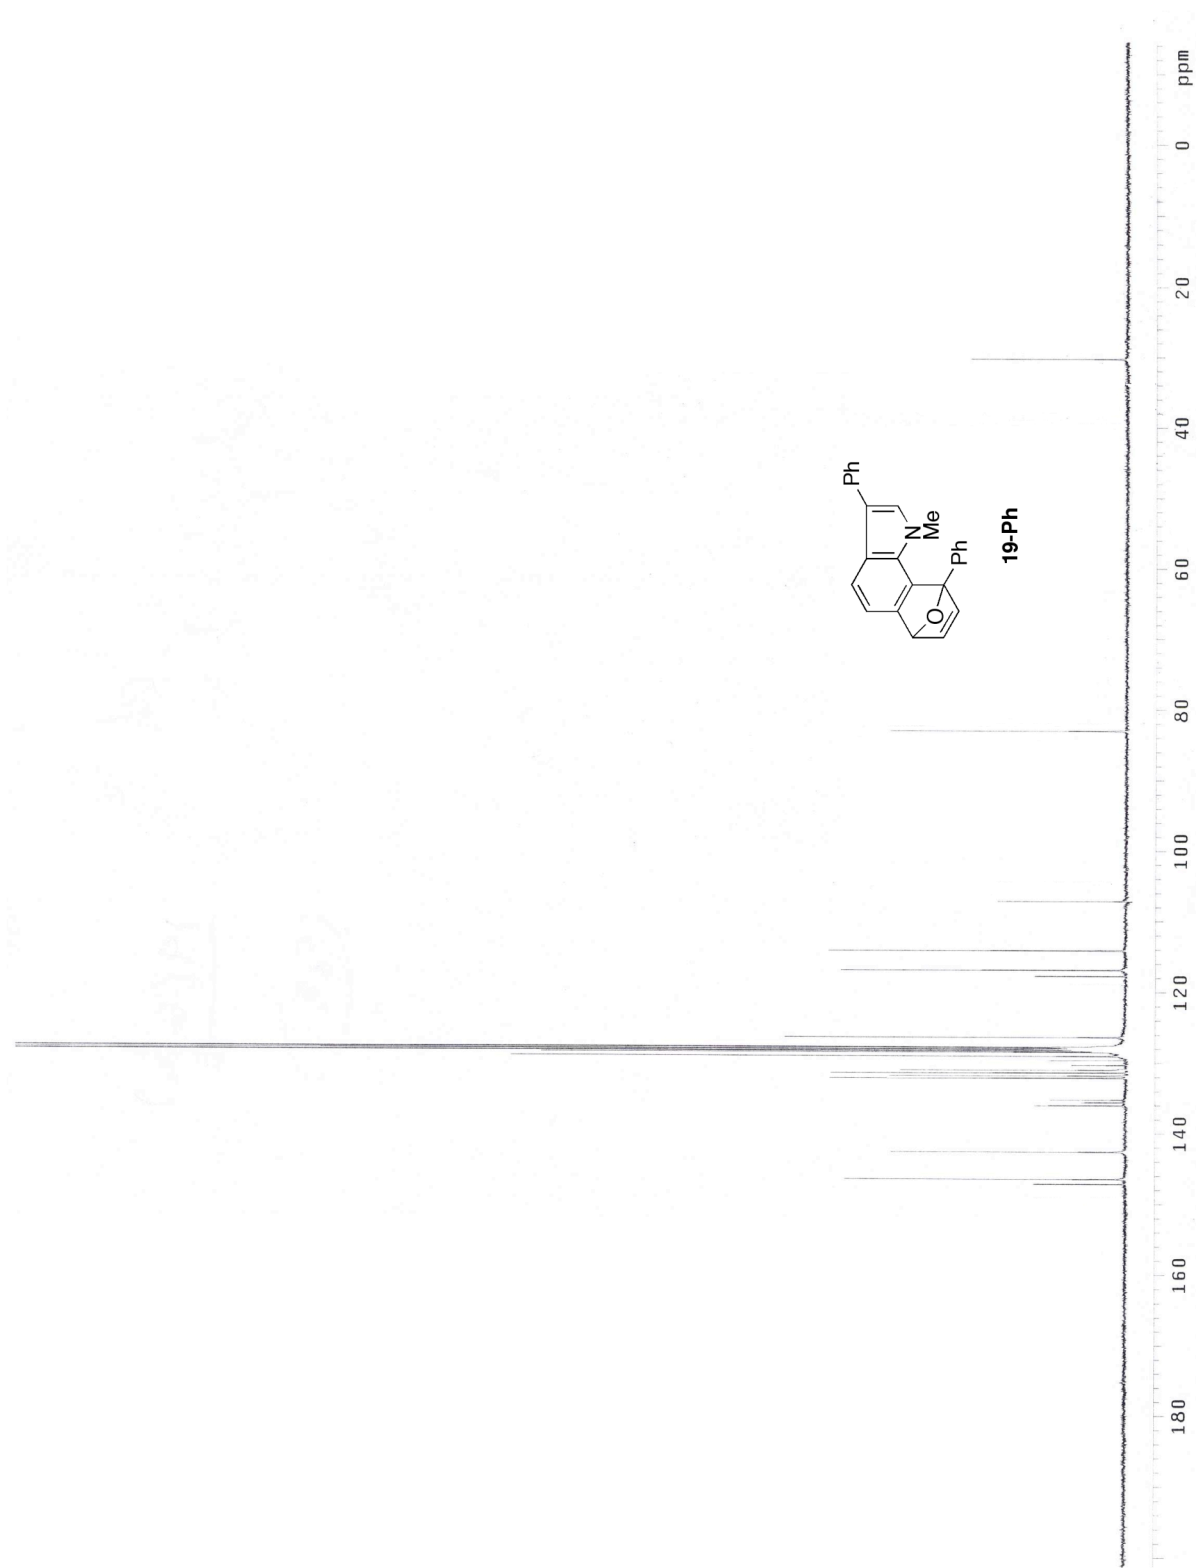

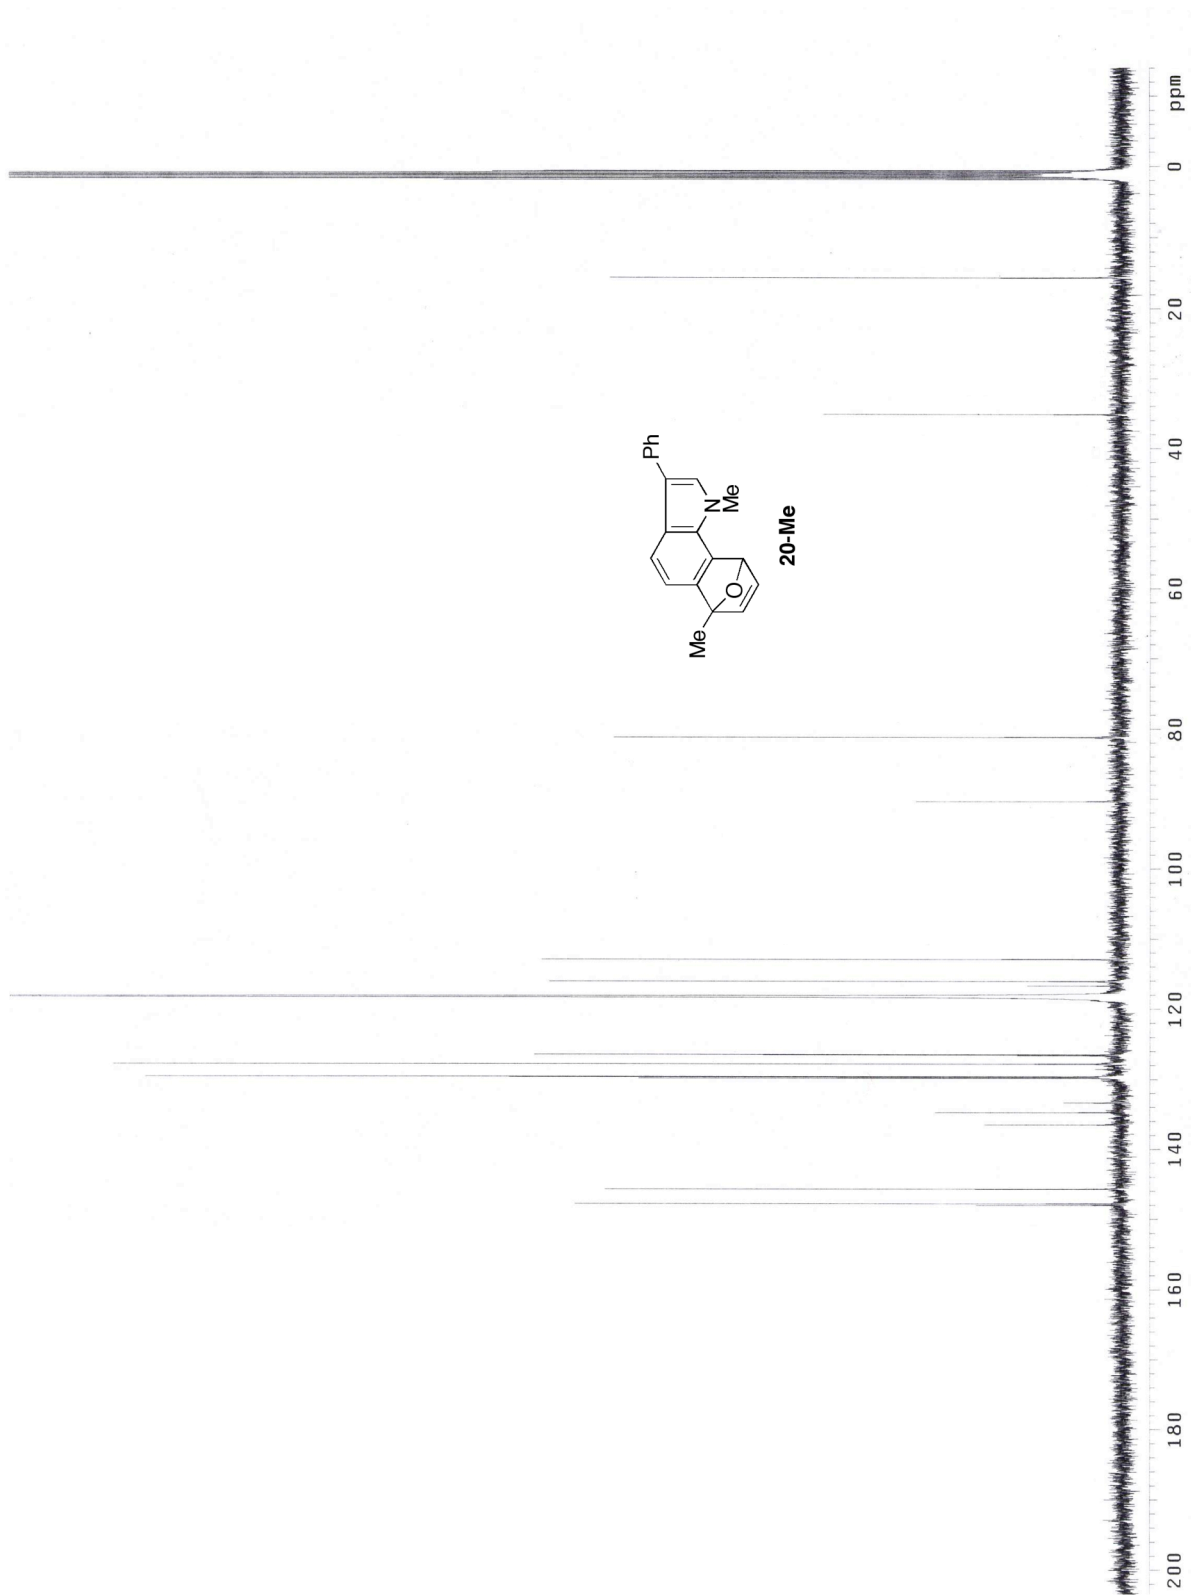

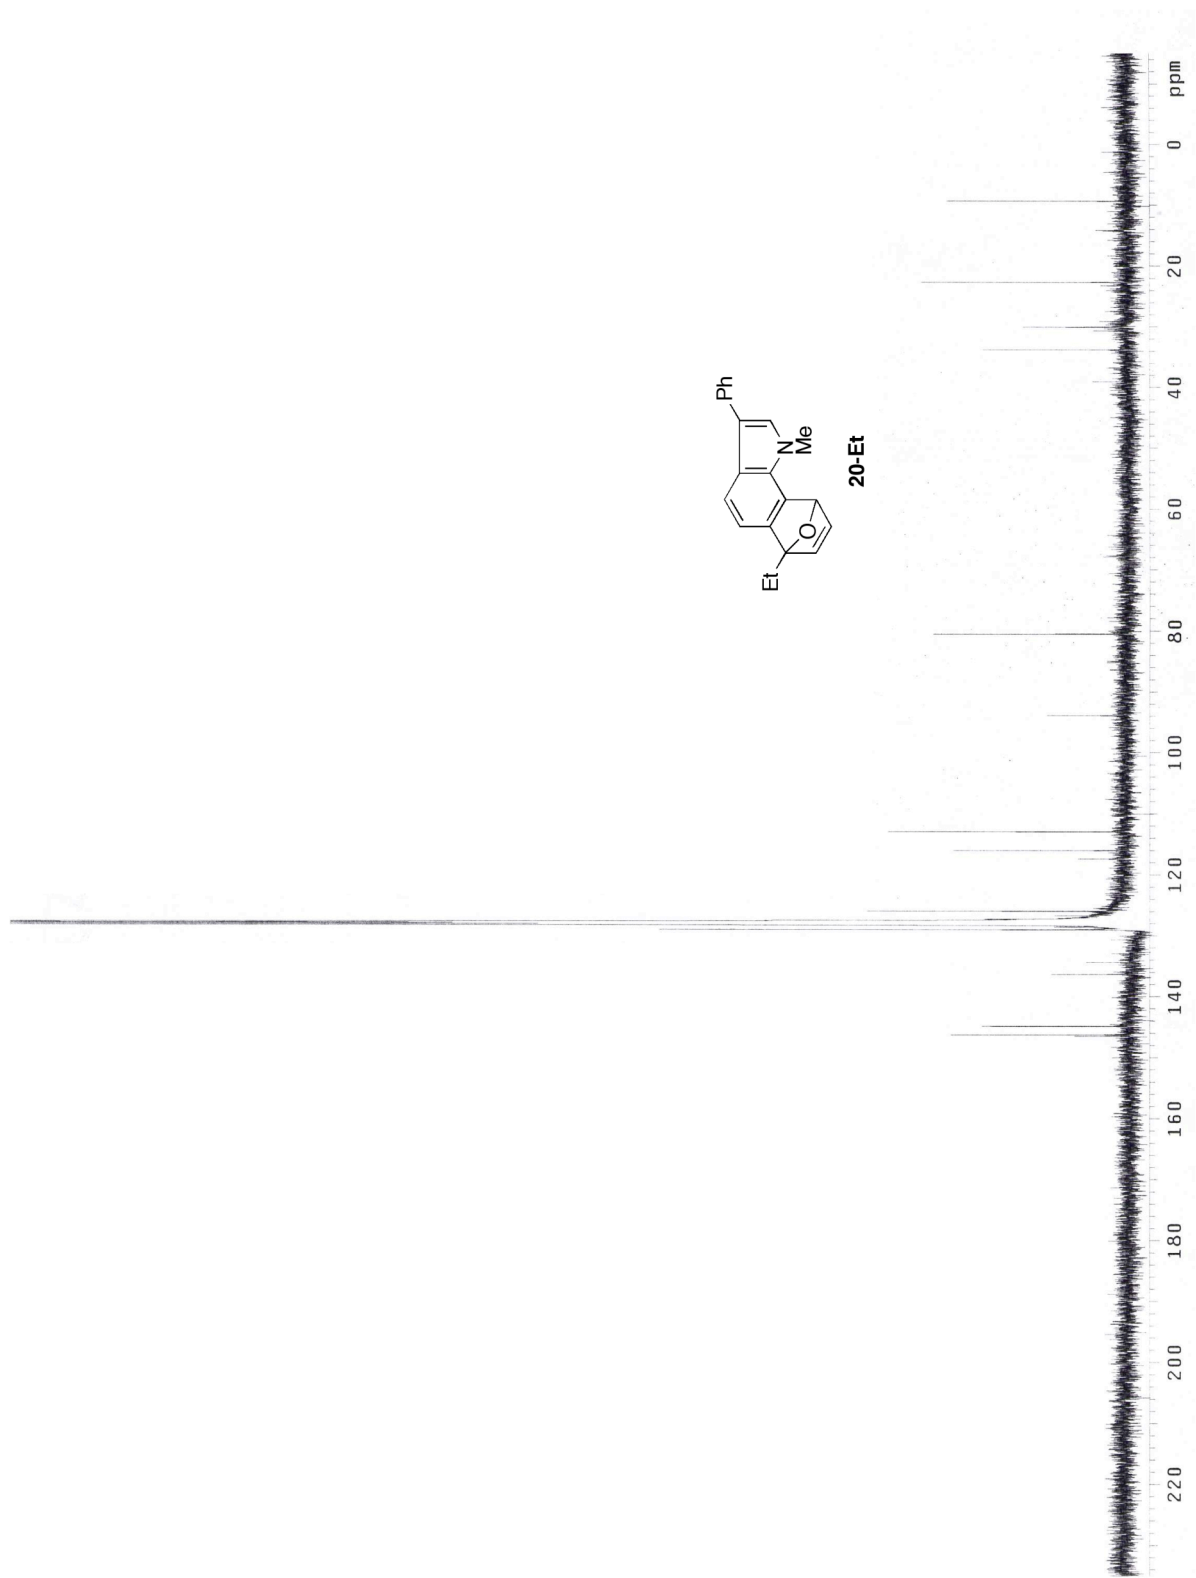

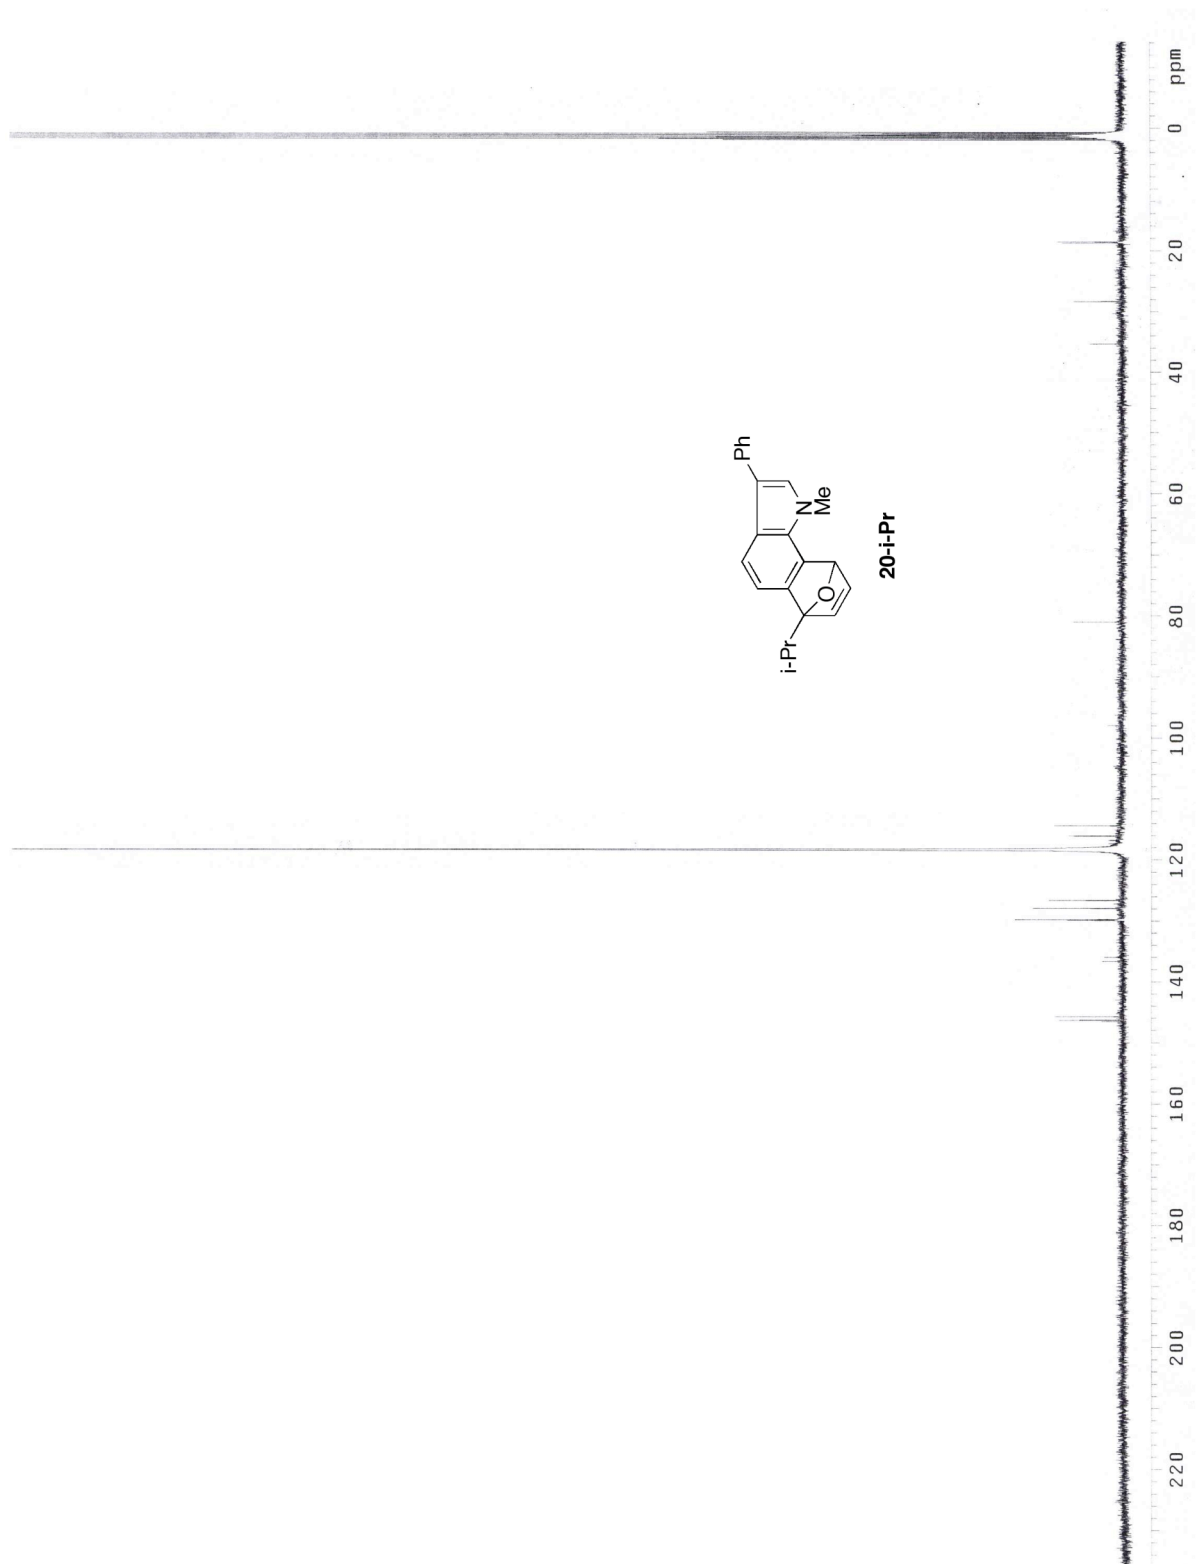

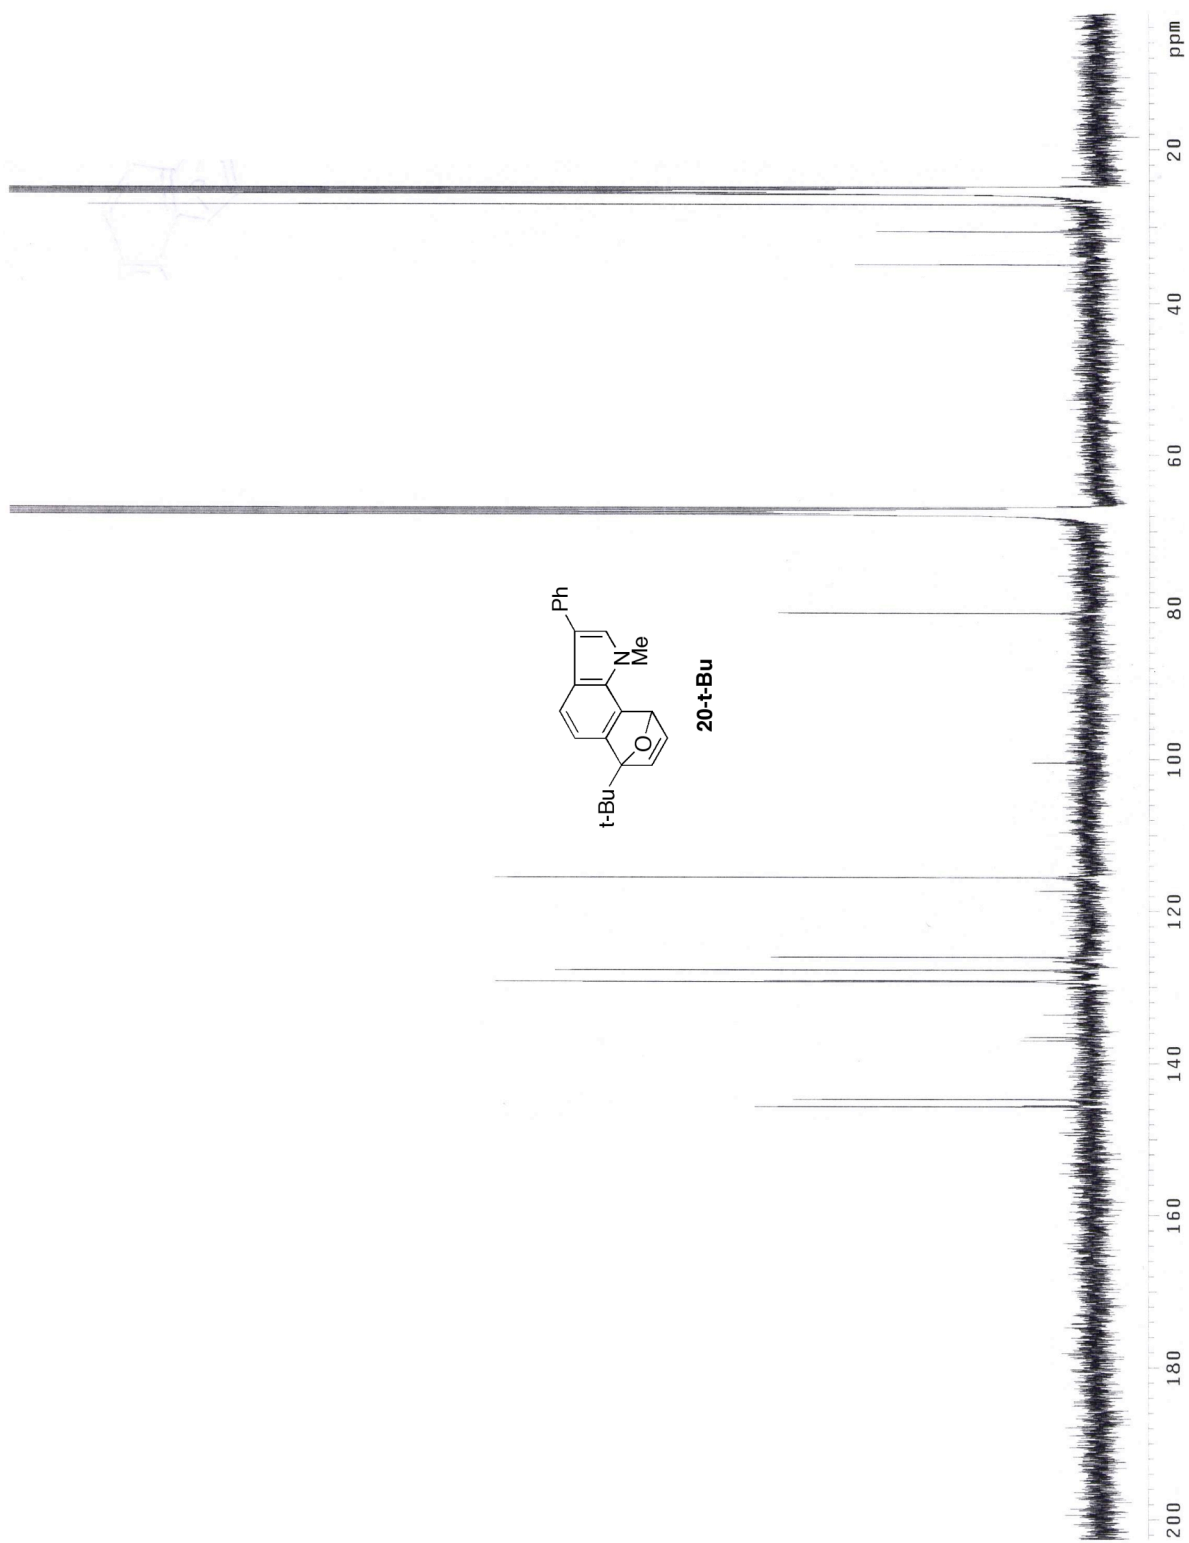



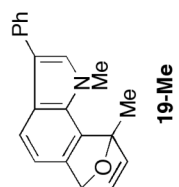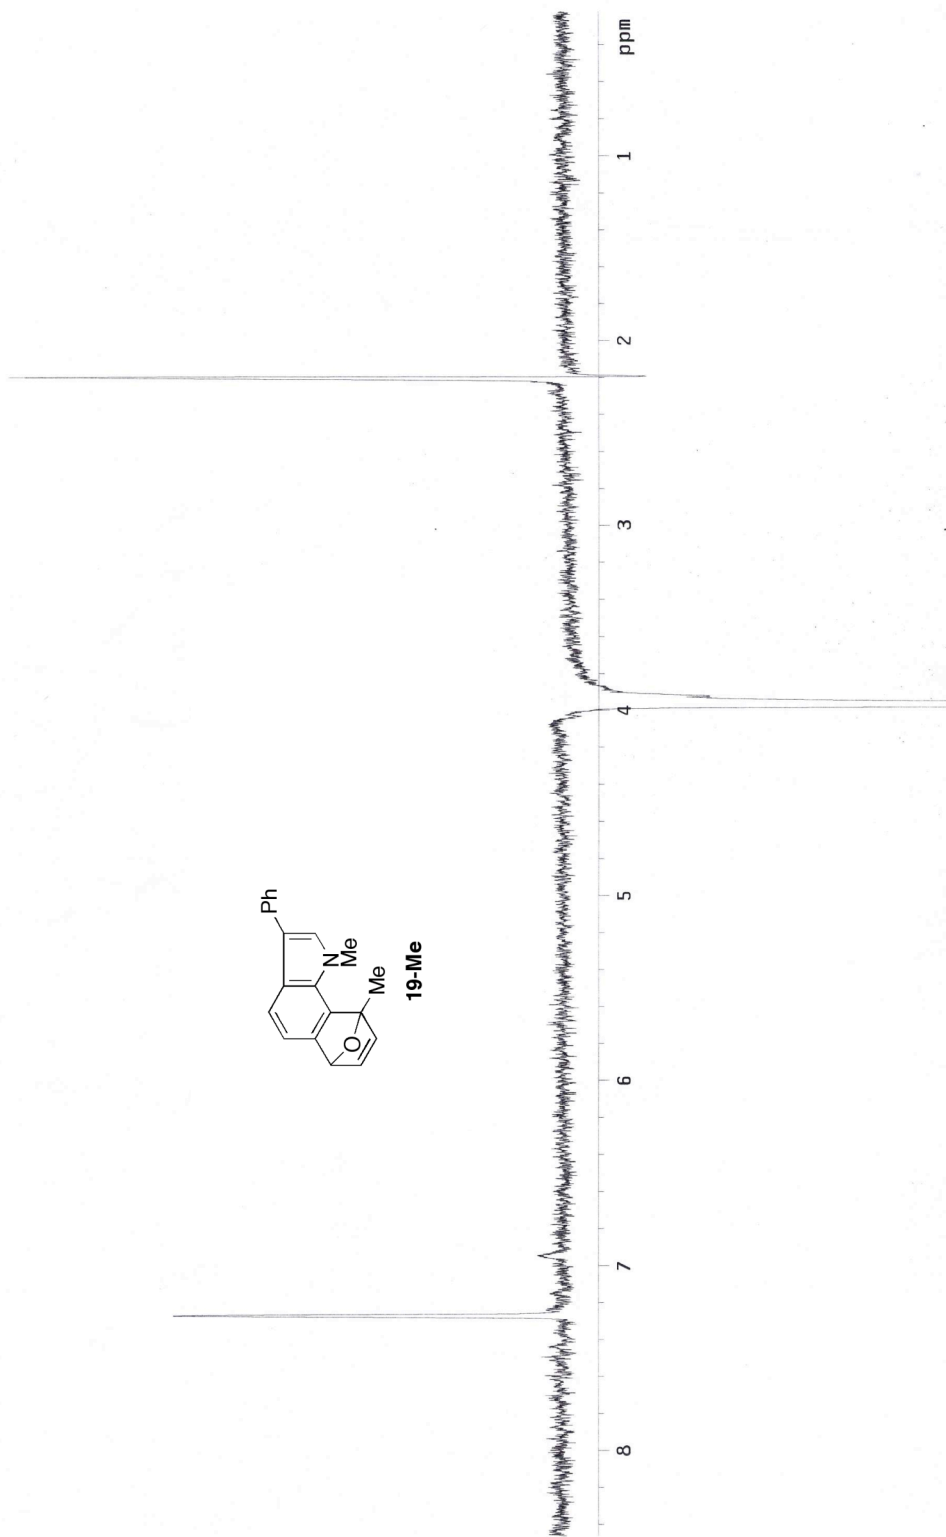



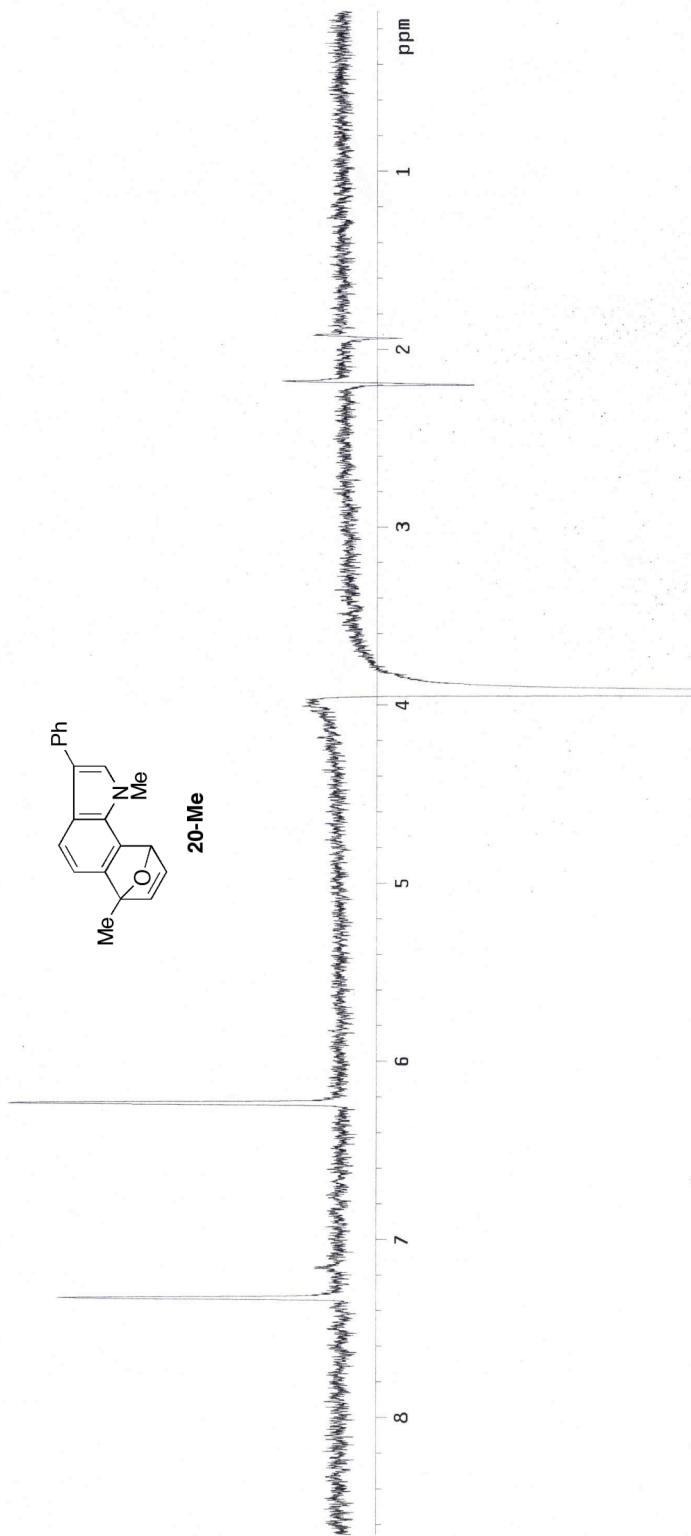

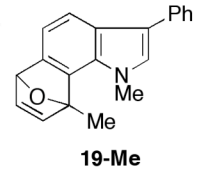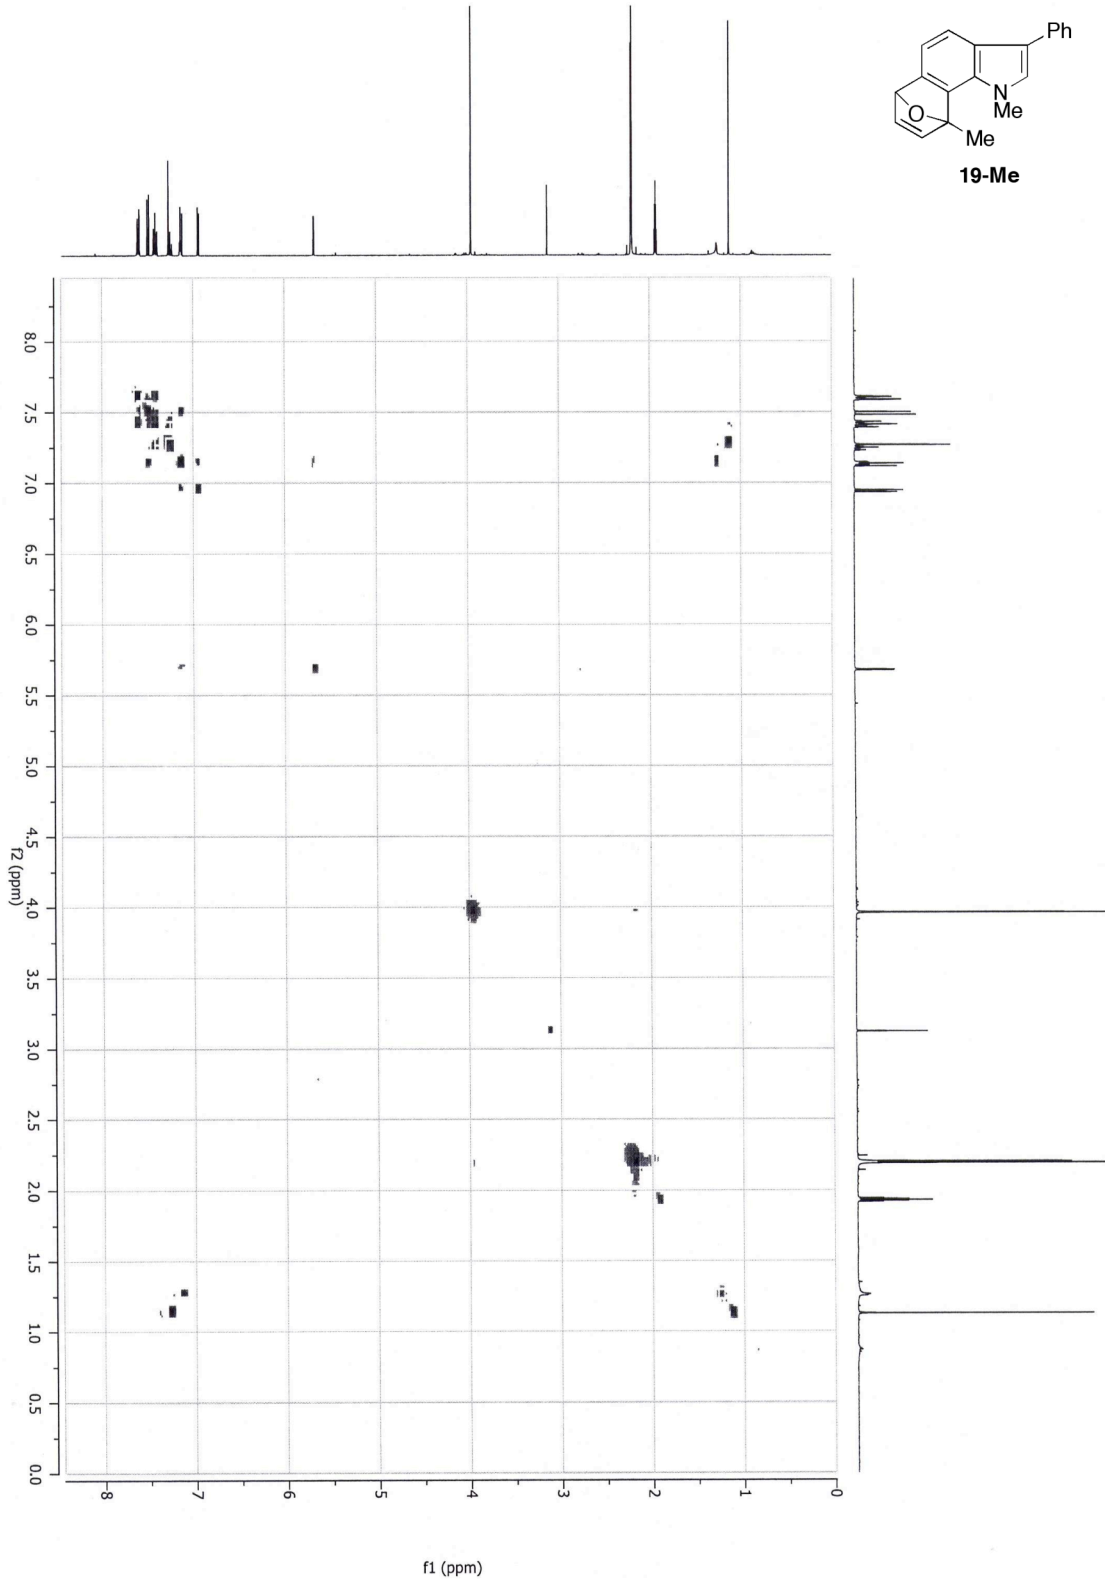

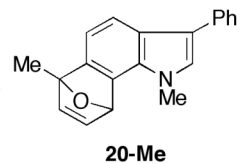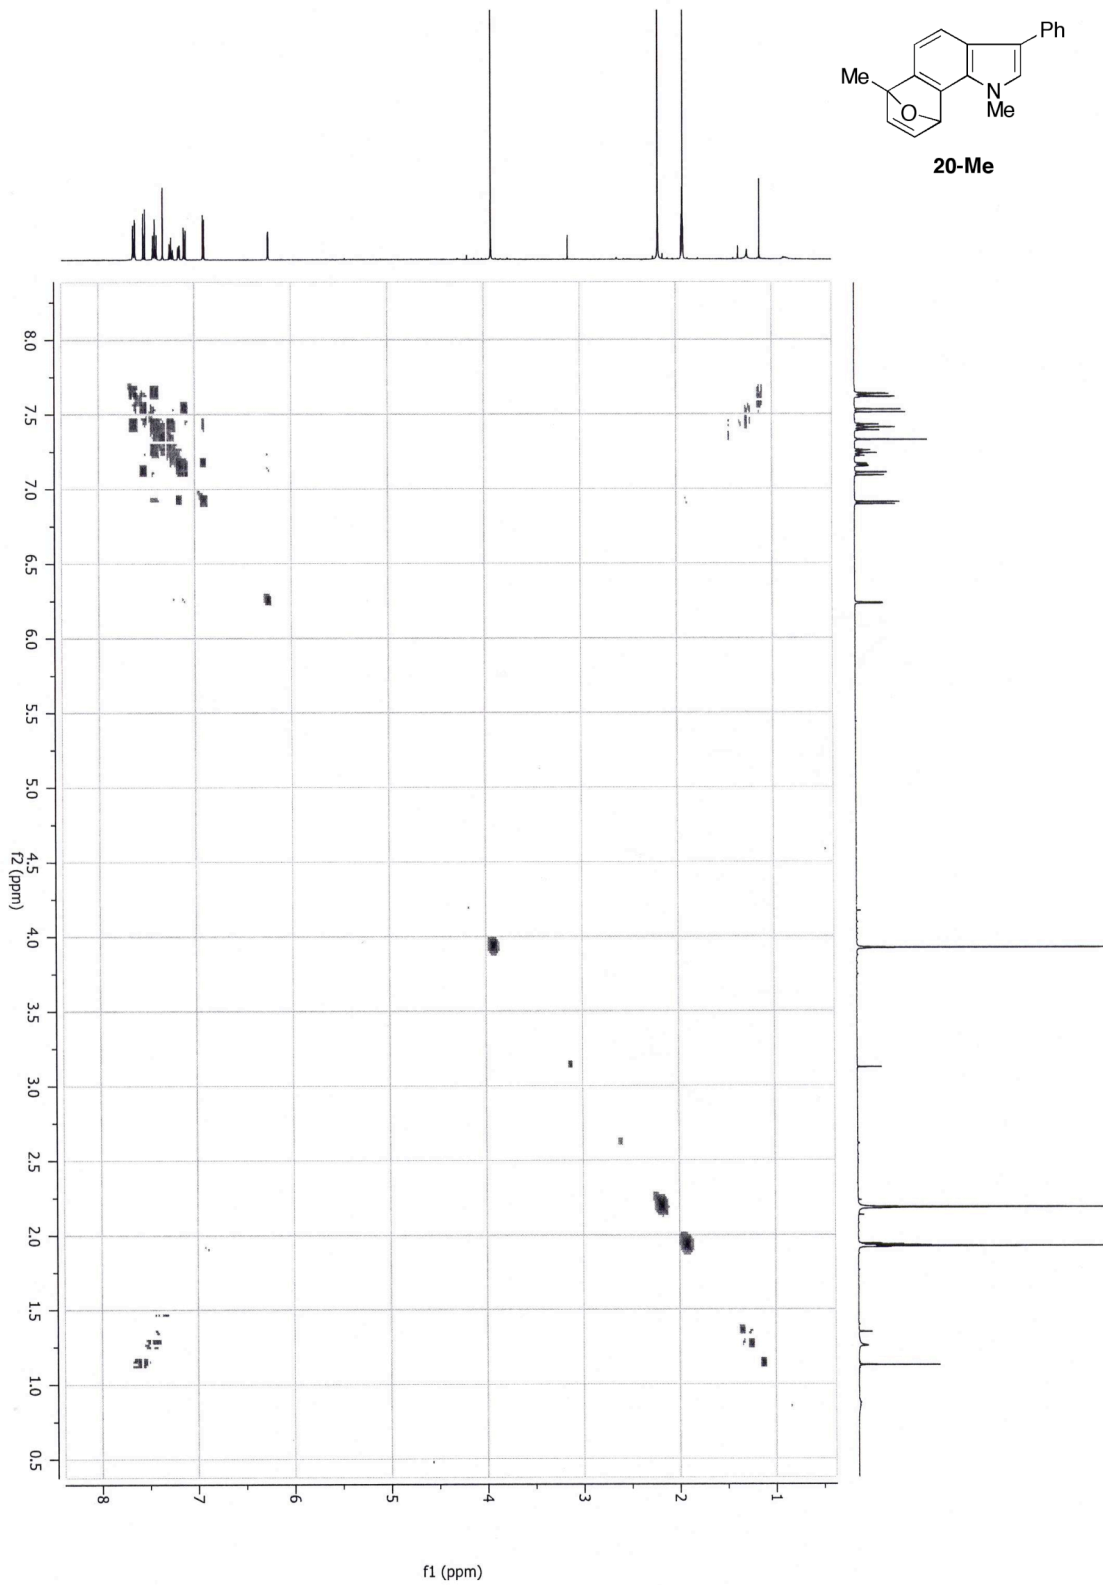

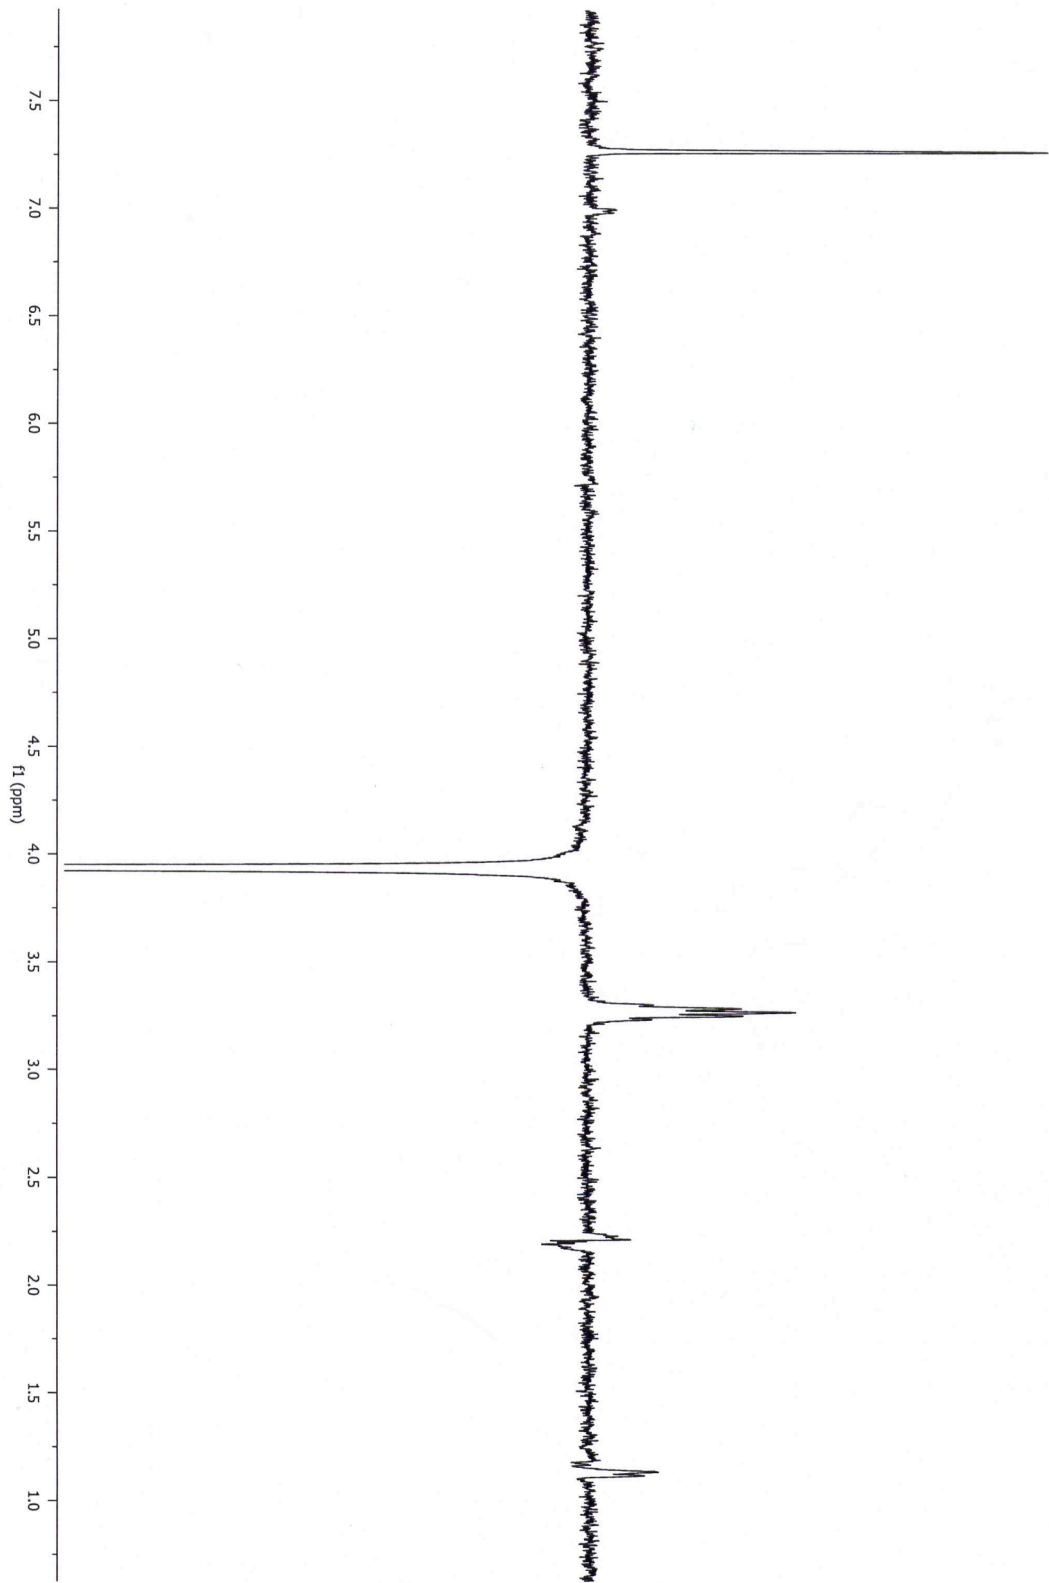

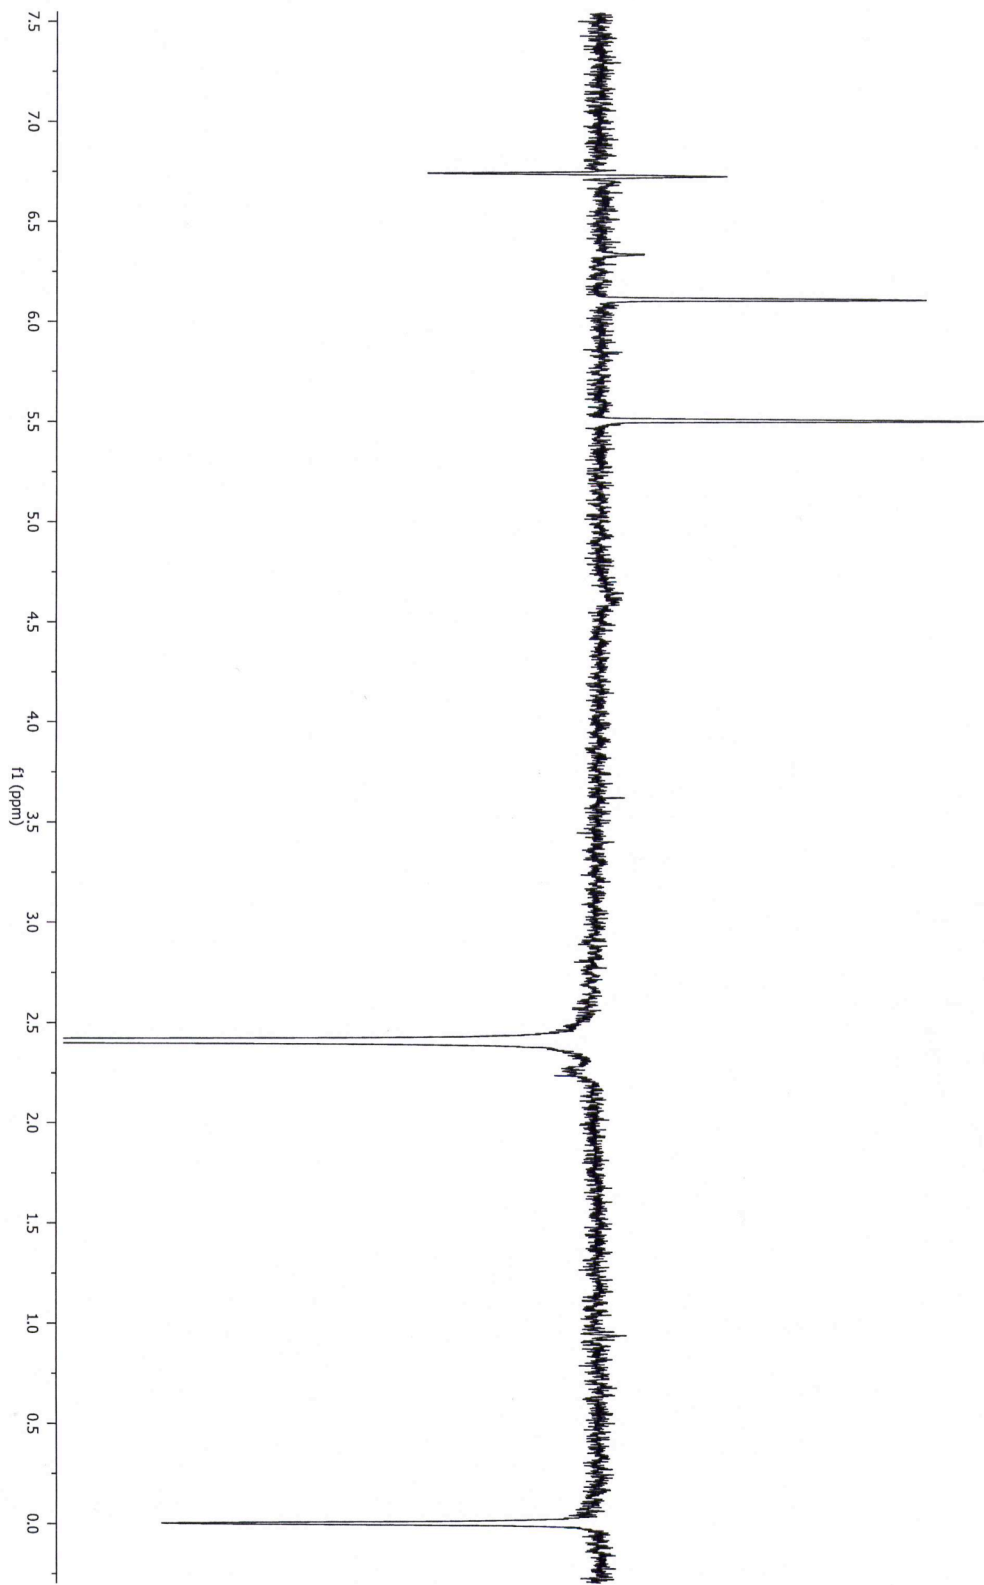

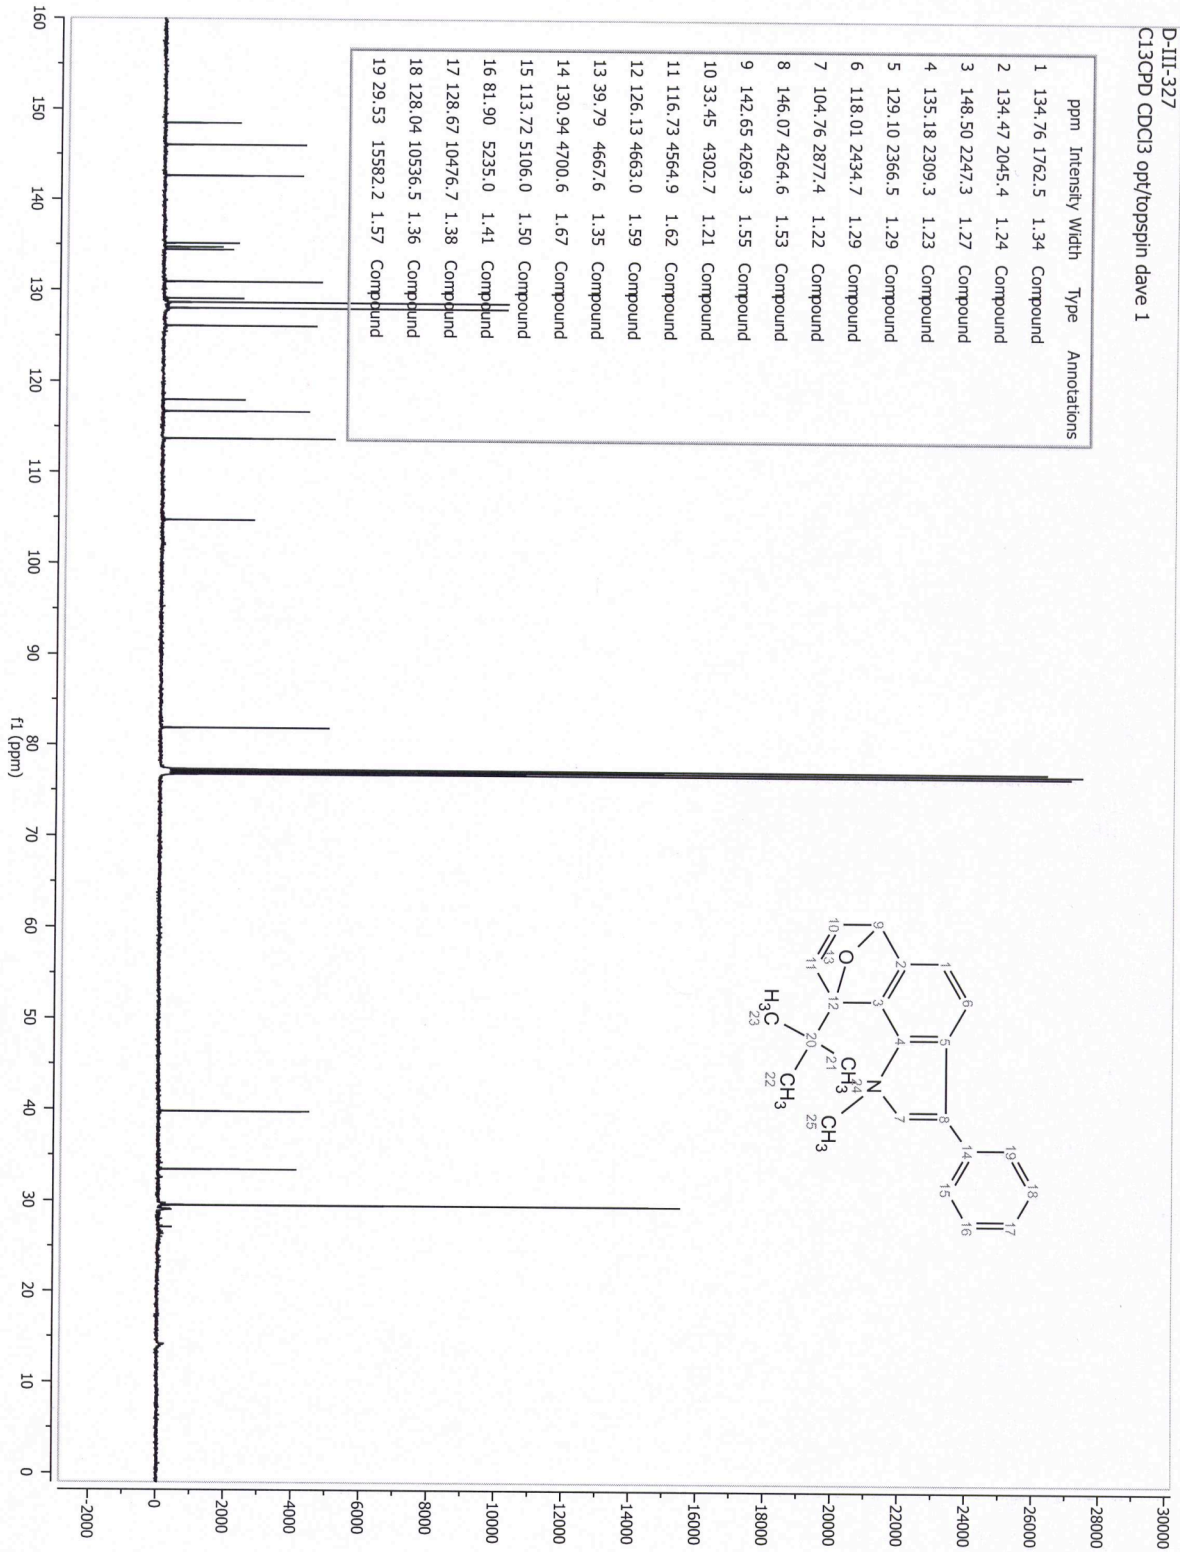

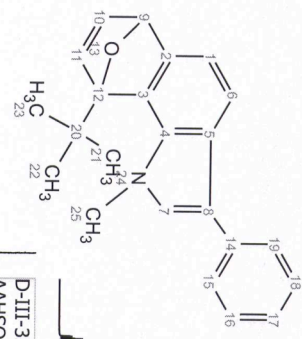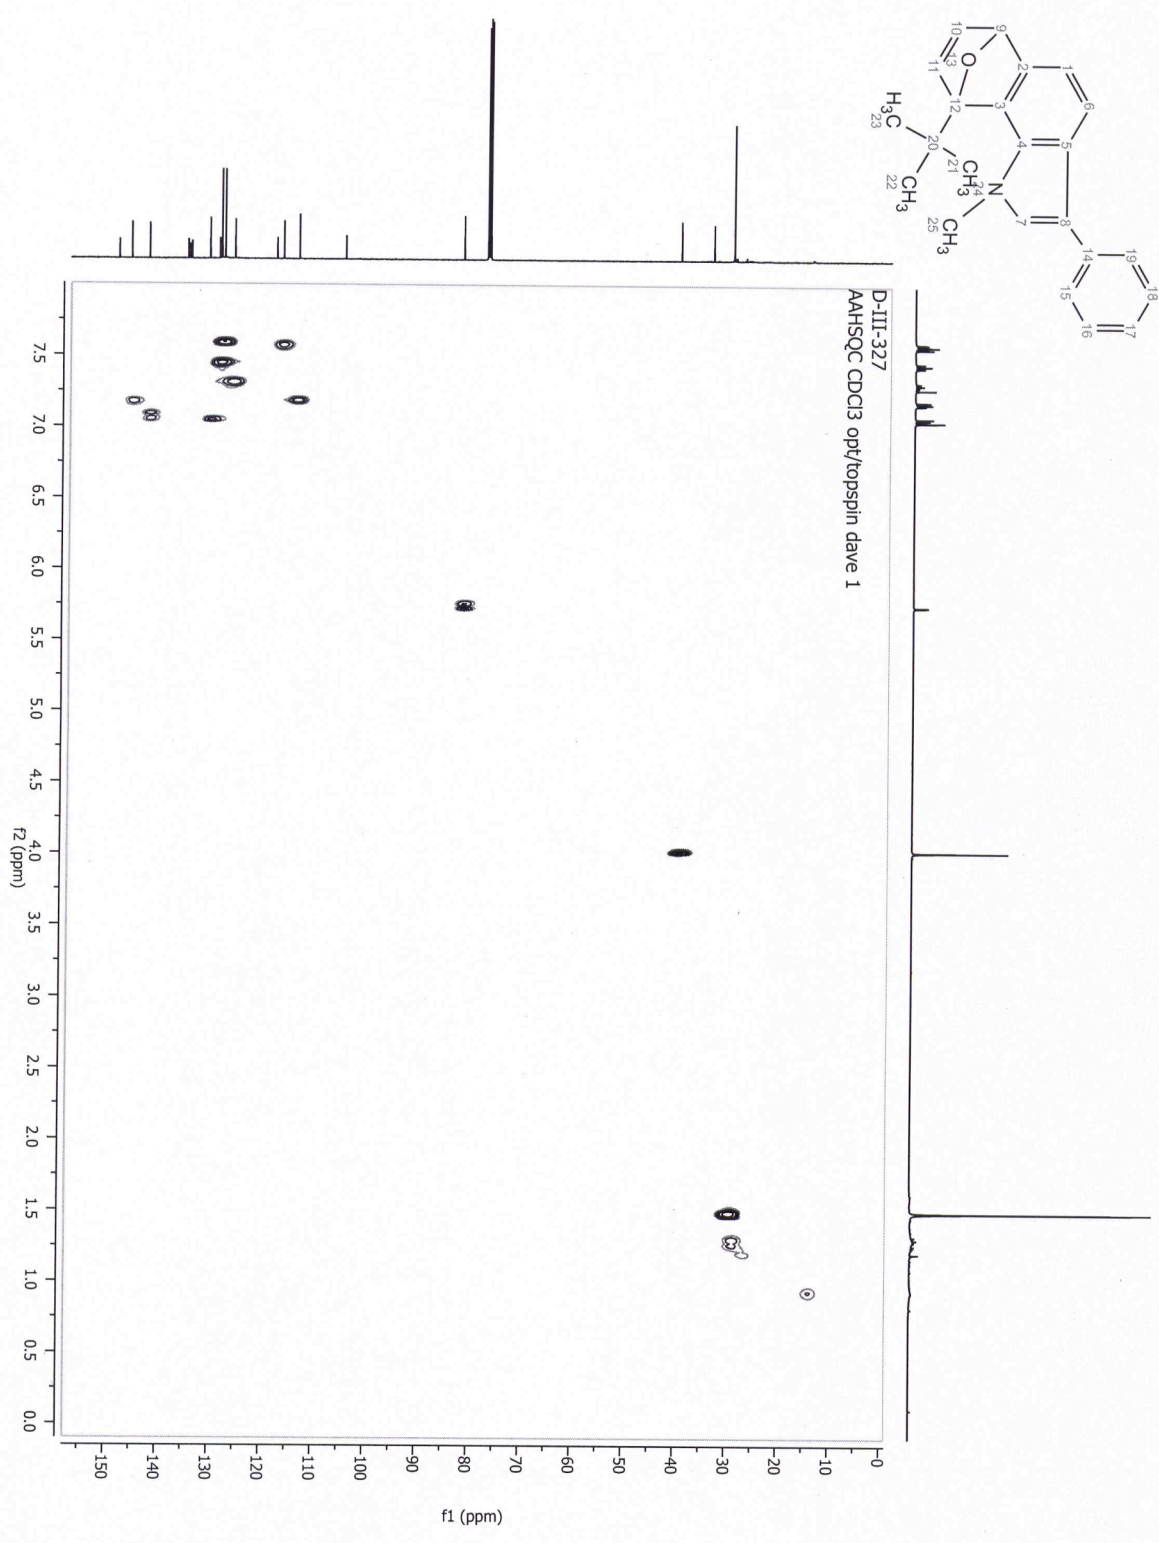

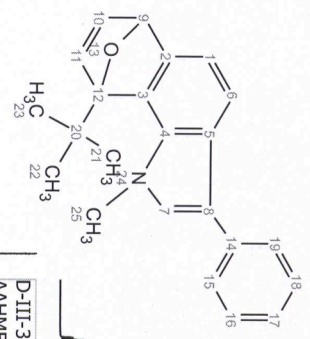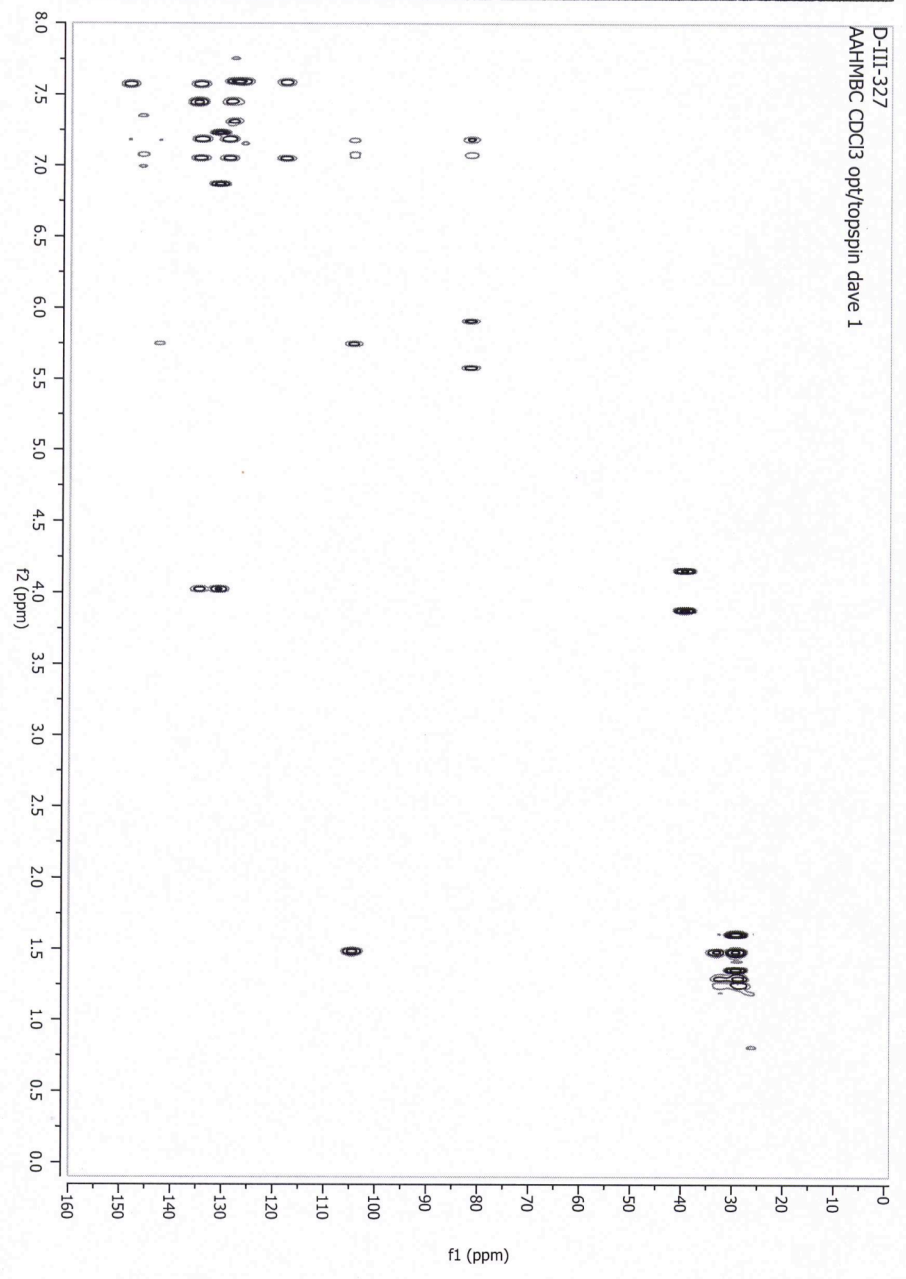



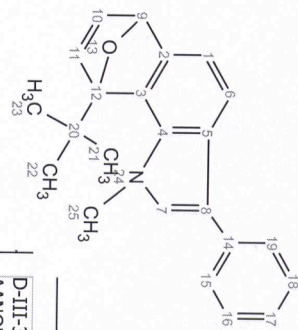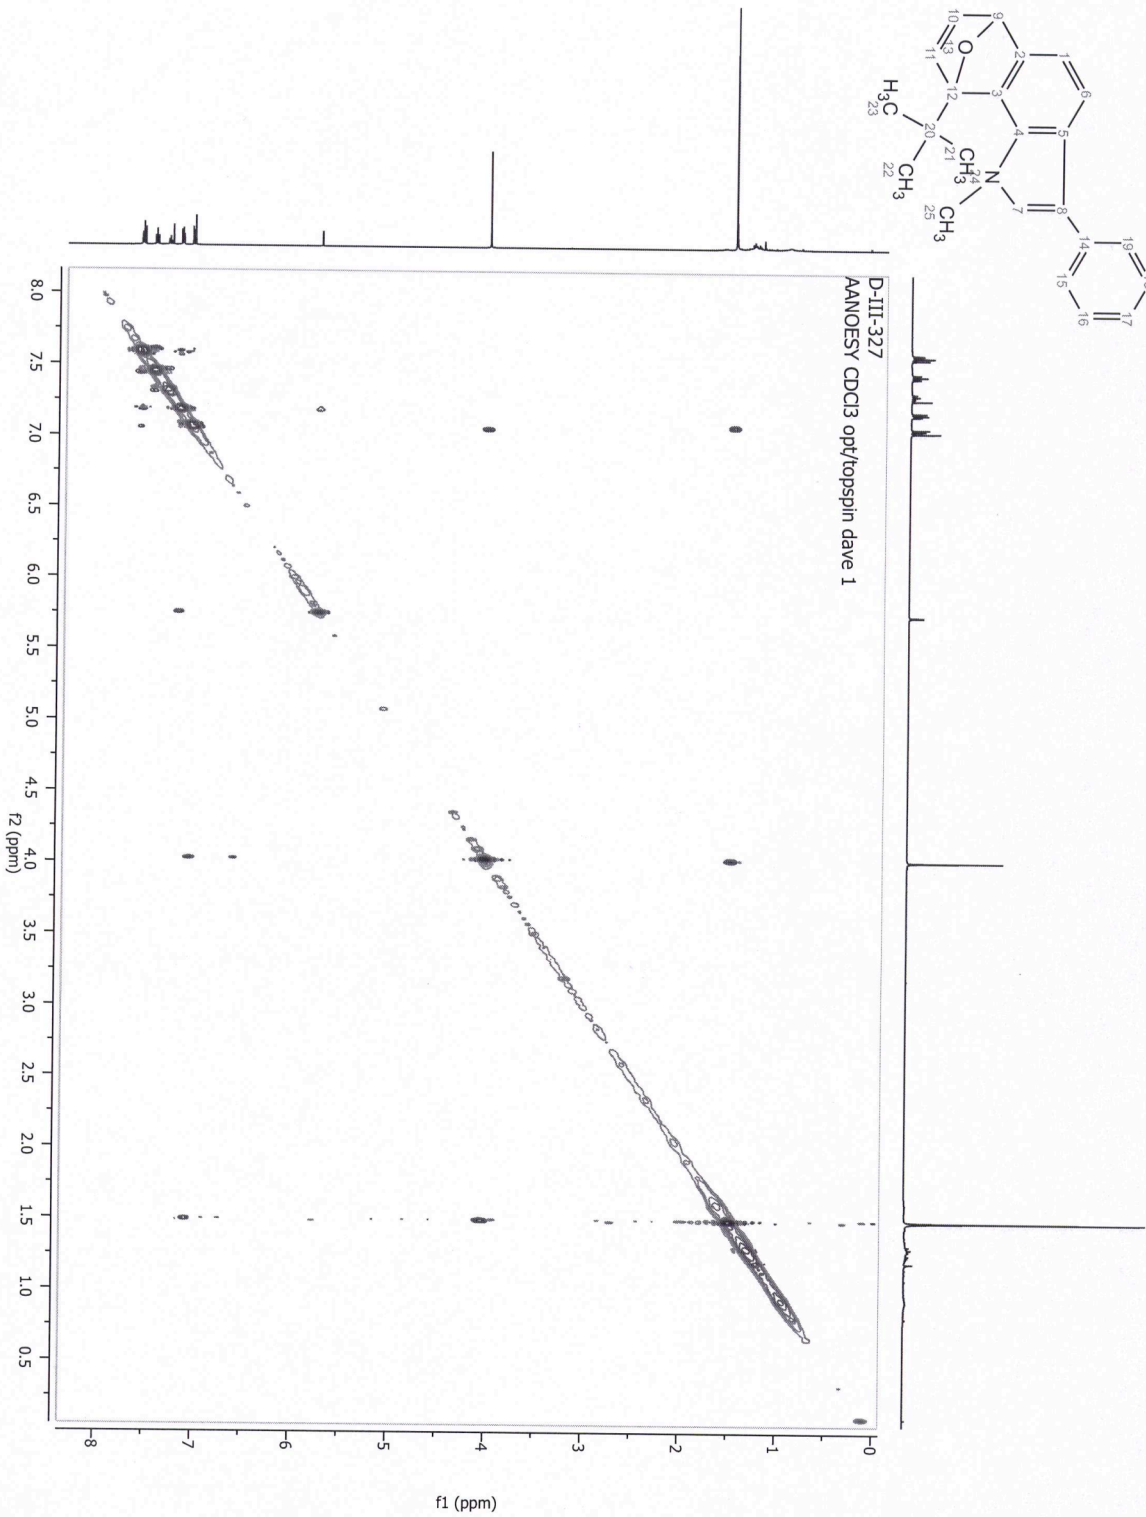

**Furan:** E[M06-2X/6-311+G(2df,p)] = -230.00340 E<sub>h</sub>

| Center Number | Atomic Number | Atomic Type | Coordinates (Angstroms) |           |           |
|---------------|---------------|-------------|-------------------------|-----------|-----------|
|               |               |             | X                       | Y         | Z         |
| 1             | 6             | 0           | 0.000000                | 1.086883  | 0.346665  |
| 2             | 6             | 0           | 0.000000                | 0.716420  | -0.952848 |
| 3             | 6             | 0           | 0.000000                | -0.716420 | -0.952848 |
| 4             | 6             | 0           | 0.000000                | -1.086883 | 0.346665  |
| 5             | 8             | 0           | 0.000000                | 0.000000  | 1.150067  |
| 6             | 1             | 0           | 0.000000                | 2.041866  | 0.842669  |
| 7             | 1             | 0           | 0.000000                | 1.373450  | -1.805839 |
| 8             | 1             | 0           | 0.000000                | -1.373450 | -1.805839 |
| 9             | 1             | 0           | 0.000000                | -2.041866 | 0.842669  |

**Me-Furan:** E[M06-2X/6-311+G(2df,p)] = -269.31631 E<sub>h</sub>

| Center Number | Atomic Number | Atomic Type | Coordinates (Angstroms) |           |           |
|---------------|---------------|-------------|-------------------------|-----------|-----------|
|               |               |             | X                       | Y         | Z         |
| 1             | 6             | 0           | -1.388716               | -0.728538 | -0.000013 |
| 2             | 6             | 0           | -1.541657               | 0.612161  | -0.000014 |
| 3             | 6             | 0           | -0.215813               | 1.158103  | 0.000026  |
| 4             | 6             | 0           | 0.633596                | 0.103907  | 0.000016  |
| 5             | 8             | 0           | -0.073267               | -1.053611 | 0.000003  |
| 6             | 1             | 0           | -2.080197               | -1.553013 | -0.000067 |
| 7             | 1             | 0           | -2.475065               | 1.149159  | 0.000176  |
| 8             | 1             | 0           | 0.066842                | 2.197653  | -0.000212 |
| 9             | 6             | 0           | 2.111686                | -0.016742 | 0.000007  |
| 10            | 1             | 0           | 2.560365                | 0.975015  | -0.000178 |
| 11            | 1             | 0           | 2.459740                | -0.556763 | -0.882475 |
| 12            | 1             | 0           | 2.459874                | -0.556499 | 0.882595  |

**Et-Furan:** E[M06-2X/6-311+G(2df,p)] = -308.62115 E<sub>h</sub>

| Center Number | Atomic Number | Atomic Type | Coordinates (Angstroms) |           |           |
|---------------|---------------|-------------|-------------------------|-----------|-----------|
|               |               |             | X                       | Y         | Z         |
| 1             | 6             | 0           | -2.026503               | -0.422831 | 0.000037  |
| 2             | 6             | 0           | -1.807571               | 0.908392  | 0.000067  |
| 3             | 6             | 0           | -0.382607               | 1.072772  | -0.000019 |
| 4             | 6             | 0           | 0.146454                | -0.174276 | -0.000111 |
| 5             | 8             | 0           | -0.849779               | -1.094728 | -0.000078 |
| 6             | 1             | 0           | -2.916858               | -1.027208 | 0.000039  |
| 7             | 1             | 0           | -2.558653               | 1.680121  | 0.000077  |
| 8             | 1             | 0           | 0.169429                | 1.997706  | -0.000150 |
| 9             | 6             | 0           | 1.538856                | -0.696229 | 0.000087  |
| 10            | 6             | 0           | 2.572381                | 0.422658  | -0.000023 |
| 11            | 1             | 0           | 2.462374                | 1.054185  | 0.882931  |
| 12            | 1             | 0           | 2.462463                | 1.053976  | -0.883114 |
| 13            | 1             | 0           | 1.675720                | -1.338927 | -0.874645 |
| 14            | 1             | 0           | 1.675575                | -1.338545 | 0.875126  |
| 15            | 1             | 0           | 3.582124                | 0.013607  | 0.000122  |

**iPr-Furan:** E[M06-2X/6-311+G(2df,p)] = -347.92780 E<sub>h</sub>

---

| Center<br>Number | Atomic<br>Number | Atomic<br>Type | Coordinates (Angstroms) |           |           |
|------------------|------------------|----------------|-------------------------|-----------|-----------|
|                  |                  |                | X                       | Y         | Z         |
| 1                | 6                | 0              | -2.193844               | -0.621087 | -0.098703 |
| 2                | 6                | 0              | -2.229141               | 0.674330  | 0.276712  |
| 3                | 6                | 0              | -0.869824               | 1.130397  | 0.243136  |
| 4                | 6                | 0              | -0.119152               | 0.073207  | -0.151086 |
| 5                | 8                | 0              | -0.920857               | -1.002141 | -0.360916 |
| 6                | 1                | 0              | -2.949997               | -1.376429 | -0.224478 |
| 7                | 1                | 0              | -3.106231               | 1.239187  | 0.543821  |
| 8                | 1                | 0              | -0.505600               | 2.116310  | 0.478509  |
| 9                | 6                | 0              | 1.341604                | -0.129830 | -0.374811 |
| 10               | 6                | 0              | 2.100884                | 1.178318  | -0.182794 |
| 11               | 6                | 0              | 1.885484                | -1.226712 | 0.545874  |
| 12               | 1                | 0              | 1.991652                | 1.535762  | 0.843938  |
| 13               | 1                | 0              | 3.163979                | 1.029127  | -0.374750 |
| 14               | 1                | 0              | 1.736337                | 1.955200  | -0.856379 |
| 15               | 1                | 0              | 2.940522                | -1.410864 | 0.335617  |
| 16               | 1                | 0              | 1.790869                | -0.921484 | 1.590393  |
| 17               | 1                | 0              | 1.338297                | -2.159647 | 0.411945  |
| 18               | 1                | 0              | 1.470965                | -0.461773 | -1.411254 |

---

**tBu-Furan:** E[M06-2X/6-311+G(2df,p)] = -387.23206 E<sub>h</sub>

---

| Center<br>Number | Atomic<br>Number | Atomic<br>Type | Coordinates (Angstroms) |           |           |
|------------------|------------------|----------------|-------------------------|-----------|-----------|
|                  |                  |                | X                       | Y         | Z         |
| 1                | 6                | 0              | 0.672492                | 2.369566  | 0.000000  |
| 2                | 6                | 0              | -0.672392               | 2.487991  | 0.000000  |
| 3                | 6                | 0              | -1.183479               | 1.150591  | 0.000000  |
| 4                | 6                | 0              | -0.107553               | 0.323977  | 0.000000  |
| 5                | 8                | 0              | 1.029042                | 1.063627  | 0.000000  |
| 6                | 1                | 0              | 1.480303                | 3.080409  | 0.000000  |
| 7                | 1                | 0              | -1.234506               | 3.406620  | 0.000000  |
| 8                | 1                | 0              | -2.218129               | 0.848888  | 0.000000  |
| 9                | 6                | 0              | 0.018161                | -1.175994 | 0.000000  |
| 10               | 6                | 0              | -0.672392               | -1.736604 | 1.251461  |
| 11               | 6                | 0              | -0.672392               | -1.736604 | -1.251461 |
| 12               | 6                | 0              | 1.490184                | -1.592277 | 0.000000  |
| 13               | 1                | 0              | -0.200991               | -1.354408 | 2.158633  |
| 14               | 1                | 0              | -1.727375               | -1.457269 | 1.273666  |
| 15               | 1                | 0              | -0.606505               | -2.827235 | 1.259269  |
| 16               | 1                | 0              | -0.200991               | -1.354408 | -2.158633 |
| 17               | 1                | 0              | -0.606505               | -2.827235 | -1.259269 |
| 18               | 1                | 0              | -1.727375               | -1.457269 | -1.273666 |
| 19               | 1                | 0              | 1.556835                | -2.681937 | 0.000000  |
| 20               | 1                | 0              | 2.008562                | -1.214527 | -0.882301 |
| 21               | 1                | 0              | 2.008562                | -1.214527 | 0.882301  |

---

21: E[M06-2X/6-311+G(2df,p)] = -401.75014 E<sub>h</sub>

| Center<br>Number | Atomic<br>Number | Atomic<br>Type | Coordinates (Angstroms) |           |           |
|------------------|------------------|----------------|-------------------------|-----------|-----------|
|                  |                  |                | X                       | Y         | Z         |
| 1                | 6                | 0              | 0.278989                | -1.139979 | 0.000000  |
| 2                | 6                | 0              | 0.000000                | 0.264734  | 0.000000  |
| 3                | 6                | 0              | 0.984080                | 1.272076  | 0.000000  |
| 4                | 6                | 0              | 2.335669                | 0.937476  | 0.000000  |
| 5                | 6                | 0              | 2.504428                | -0.444977 | 0.000000  |
| 6                | 6                | 0              | 1.656476                | -1.336883 | 0.000000  |
| 7                | 6                | 0              | -0.966780               | -1.822877 | 0.000000  |
| 8                | 6                | 0              | -1.930717               | -0.853932 | 0.000000  |
| 9                | 1                | 0              | 0.694504                | 2.316398  | 0.000000  |
| 10               | 1                | 0              | 3.113936                | 1.686171  | 0.000000  |
| 11               | 1                | 0              | -1.133376               | -2.886114 | 0.000000  |
| 12               | 1                | 0              | -3.004870               | -0.954257 | 0.000000  |
| 13               | 7                | 0              | -1.366232               | 0.394847  | 0.000000  |
| 14               | 6                | 0              | -2.078741               | 1.650524  | 0.000000  |
| 15               | 1                | 0              | -3.148069               | 1.449817  | 0.000000  |
| 16               | 1                | 0              | -1.829466               | 2.233541  | 0.888658  |
| 17               | 1                | 0              | -1.829466               | 2.233541  | -0.888658 |

22: E[M06-2X/6-311+G(2df,p)] = -401.74652 E<sub>h</sub>

| Center<br>Number | Atomic<br>Number | Atomic<br>Type | Coordinates (Angstroms) |           |           |
|------------------|------------------|----------------|-------------------------|-----------|-----------|
|                  |                  |                | X                       | Y         | Z         |
| 1                | 6                | 0              | 0.408965                | -0.996811 | 0.000000  |
| 2                | 6                | 0              | 0.000000                | 0.377356  | 0.000000  |
| 3                | 6                | 0              | 0.888803                | 1.474188  | 0.000000  |
| 4                | 6                | 0              | 2.171928                | 0.987383  | 0.000000  |
| 5                | 6                | 0              | 2.528739                | -0.201583 | 0.000000  |
| 6                | 6                | 0              | 1.779293                | -1.347271 | 0.000000  |
| 7                | 6                | 0              | -0.795056               | -1.774464 | 0.000000  |
| 8                | 6                | 0              | -1.835213               | -0.897094 | 0.000000  |
| 9                | 1                | 0              | 0.565637                | 2.506444  | 0.000000  |
| 10               | 1                | 0              | 2.125946                | -2.371129 | 0.000000  |
| 11               | 1                | 0              | -0.873022               | -2.848634 | 0.000000  |
| 12               | 1                | 0              | -2.898102               | -1.084834 | 0.000000  |
| 13               | 7                | 0              | -1.372053               | 0.397072  | 0.000000  |
| 14               | 6                | 0              | -2.173089               | 1.595908  | 0.000000  |
| 15               | 1                | 0              | -3.225080               | 1.318174  | 0.000000  |
| 16               | 1                | 0              | -1.968616               | 2.197407  | 0.888489  |
| 17               | 1                | 0              | -1.968616               | 2.197407  | -0.888489 |

23: E[M06-2X/6-311+G(2df,p)] = -401.75143 E<sub>h</sub>

| Center<br>Number | Atomic<br>Number | Atomic<br>Type | Coordinates (Angstroms) |           |           |
|------------------|------------------|----------------|-------------------------|-----------|-----------|
|                  |                  |                | X                       | Y         | Z         |
| 1                | 6                | 0              | 0.138949                | -0.973210 | 0.000000  |
| 2                | 6                | 0              | 0.000000                | 0.447098  | 0.000000  |
| 3                | 6                | 0              | 1.183561                | 1.180415  | 0.000000  |
| 4                | 6                | 0              | 2.241950                | 0.543730  | 0.000000  |
| 5                | 6                | 0              | 2.582759                | -0.797939 | 0.000000  |
| 6                | 6                | 0              | 1.418417                | -1.565681 | 0.000000  |
| 7                | 6                | 0              | -1.196309               | -1.489982 | 0.000000  |
| 8                | 6                | 0              | -2.040234               | -0.418670 | 0.000000  |
| 9                | 1                | 0              | 3.572058                | -1.227708 | 0.000000  |
| 10               | 1                | 0              | 1.510361                | -2.645671 | 0.000000  |
| 11               | 1                | 0              | -1.496098               | -2.524819 | 0.000000  |
| 12               | 1                | 0              | -3.118426               | -0.388857 | 0.000000  |
| 13               | 7                | 0              | -1.326252               | 0.757621  | 0.000000  |
| 14               | 6                | 0              | -1.859513               | 2.099934  | 0.000000  |
| 15               | 1                | 0              | -2.946165               | 2.047654  | 0.000000  |
| 16               | 1                | 0              | -1.527721               | 2.640942  | 0.887234  |
| 17               | 1                | 0              | -1.527721               | 2.640942  | -0.887234 |

27,0: E[M06-2X/6-311+G(2df,p)] = -382.30617 E<sub>h</sub>

| Center<br>Number | Atomic<br>Number | Atomic<br>Type | Coordinates (Angstroms) |           |          |
|------------------|------------------|----------------|-------------------------|-----------|----------|
|                  |                  |                | X                       | Y         | Z        |
| 1                | 6                | 0              | -0.466039               | -0.763004 | 0.000000 |
| 2                | 6                | 0              | 0.000000                | 0.569902  | 0.000000 |
| 3                | 6                | 0              | 1.343822                | 0.963149  | 0.000000 |
| 4                | 6                | 0              | 2.343748                | -0.008532 | 0.000000 |
| 5                | 6                | 0              | 1.785949                | -1.280684 | 0.000000 |
| 6                | 6                | 0              | 0.608914                | -1.643850 | 0.000000 |
| 7                | 6                | 0              | -1.897801               | -0.682494 | 0.000000 |
| 8                | 6                | 0              | -2.178839               | 0.636788  | 0.000000 |
| 9                | 1                | 0              | 1.594840                | 2.015901  | 0.000000 |
| 10               | 1                | 0              | 3.394130                | 0.241207  | 0.000000 |
| 11               | 1                | 0              | -2.610201               | -1.489129 | 0.000000 |
| 12               | 1                | 0              | -3.112375               | 1.173836  | 0.000000 |
| 13               | 8                | 0              | -1.063116               | 1.413817  | 0.000000 |

**28,o:** E[M06-2X/6-311+G(2df,p)] = -382.30462 E<sub>h</sub>

| Center Number | Atomic Number | Atomic Type | Coordinates (Angstroms) |           |          |
|---------------|---------------|-------------|-------------------------|-----------|----------|
|               |               |             | X                       | Y         | Z        |
| 1             | 6             | 0           | 0.256284                | -0.726106 | 0.000000 |
| 2             | 6             | 0           | 0.000000                | 0.669869  | 0.000000 |
| 3             | 6             | 0           | -1.266998               | 1.265770  | 0.000000 |
| 4             | 6             | 0           | -2.197094               | 0.252144  | 0.000000 |
| 5             | 6             | 0           | -1.984907               | -0.968887 | 0.000000 |
| 6             | 6             | 0           | -0.799035               | -1.660234 | 0.000000 |
| 7             | 6             | 0           | 1.694695                | -0.837323 | 0.000000 |
| 8             | 6             | 0           | 2.167745                | 0.421727  | 0.000000 |
| 9             | 1             | 0           | -1.420973               | 2.335204  | 0.000000 |
| 10            | 1             | 0           | -0.650111               | -2.730409 | 0.000000 |
| 11            | 1             | 0           | 2.285776                | -1.737543 | 0.000000 |
| 12            | 1             | 0           | 3.169882                | 0.817294  | 0.000000 |
| 13            | 8             | 0           | 1.173910                | 1.351712  | 0.000000 |

**29,o:** E[M06-2X/6-311+G(2df,p)] = -382.30728 E<sub>h</sub>

| Center Number | Atomic Number | Atomic Type | Coordinates (Angstroms) |           |          |
|---------------|---------------|-------------|-------------------------|-----------|----------|
|               |               |             | X                       | Y         | Z        |
| 1             | 6             | 0           | 0.000000                | 0.676840  | 0.000000 |
| 2             | 6             | 0           | -0.391119               | -0.679644 | 0.000000 |
| 3             | 6             | 0           | 0.612189                | -1.626959 | 0.000000 |
| 4             | 6             | 0           | 1.771258                | -1.193857 | 0.000000 |
| 5             | 6             | 0           | 2.359381                | 0.053105  | 0.000000 |
| 6             | 6             | 0           | 1.360477                | 1.030914  | 0.000000 |
| 7             | 6             | 0           | -1.242300               | 1.409211  | 0.000000 |
| 8             | 6             | 0           | -2.220686               | 0.483934  | 0.000000 |
| 9             | 1             | 0           | 3.412204                | 0.287933  | 0.000000 |
| 10            | 1             | 0           | 1.652007                | 2.074262  | 0.000000 |
| 11            | 1             | 0           | -1.382381               | 2.477200  | 0.000000 |
| 12            | 1             | 0           | -3.294300               | 0.565634  | 0.000000 |
| 13            | 8             | 0           | -1.735341               | -0.790787 | 0.000000 |

**27,s:** E[M06-2X/6-311+G(2df,p)] = -705.28893 E<sub>h</sub>

| Center Number | Atomic Number | Atomic Type | Coordinates (Angstroms) |           |          |
|---------------|---------------|-------------|-------------------------|-----------|----------|
|               |               |             | X                       | Y         | Z        |
| 1             | 6             | 0           | 0.207575                | -0.945526 | 0.000000 |
| 2             | 6             | 0           | 0.000000                | 0.464698  | 0.000000 |
| 3             | 6             | 0           | 1.042190                | 1.411147  | 0.000000 |
| 4             | 6             | 0           | 2.376844                | 1.014052  | 0.000000 |
| 5             | 6             | 0           | 2.468350                | -0.372349 | 0.000000 |
| 6             | 6             | 0           | 1.572471                | -1.215732 | 0.000000 |
| 7             | 6             | 0           | -1.013422               | -1.685199 | 0.000000 |
| 8             | 6             | 0           | -2.092900               | -0.871401 | 0.000000 |
| 9             | 1             | 0           | 0.804077                | 2.468211  | 0.000000 |
| 10            | 1             | 0           | 3.191111                | 1.723289  | 0.000000 |
| 11            | 1             | 0           | -1.065618               | -2.763584 | 0.000000 |
| 12            | 1             | 0           | -3.131322               | -1.163874 | 0.000000 |
| 13            | 16            | 0           | -1.697806               | 0.808614  | 0.000000 |

**28,S:** E[M06-2X/6-311+G(2df,p)] = -705.28474 E<sub>h</sub>

---

| Center<br>Number | Atomic<br>Number | Atomic<br>Type | Coordinates (Angstroms) |           |          |
|------------------|------------------|----------------|-------------------------|-----------|----------|
|                  |                  |                | X                       | Y         | Z        |
| 1                | 6                | 0              | 0.319496                | -0.813911 | 0.000000 |
| 2                | 6                | 0              | 0.000000                | 0.573993  | 0.000000 |
| 3                | 6                | 0              | 0.966631                | 1.601425  | 0.000000 |
| 4                | 6                | 0              | 2.213748                | 1.034744  | 0.000000 |
| 5                | 6                | 0              | 2.499583                | -0.172741 | 0.000000 |
| 6                | 6                | 0              | 1.666518                | -1.255903 | 0.000000 |
| 7                | 6                | 0              | -0.868032               | -1.625528 | 0.000000 |
| 8                | 6                | 0              | -2.002855               | -0.898654 | 0.000000 |
| 9                | 1                | 0              | 0.710163                | 2.651656  | 0.000000 |
| 10               | 1                | 0              | 1.931676                | -2.304120 | 0.000000 |
| 11               | 1                | 0              | -0.848563               | -2.706368 | 0.000000 |
| 12               | 1                | 0              | -3.017753               | -1.265266 | 0.000000 |
| 13               | 16               | 0              | -1.721629               | 0.810222  | 0.000000 |

---

**29,S:** E[M06-2X/6-311+G(2df,p)] = -705.28785 E<sub>h</sub>

---

| Center<br>Number | Atomic<br>Number | Atomic<br>Type | Coordinates (Angstroms) |           |          |
|------------------|------------------|----------------|-------------------------|-----------|----------|
|                  |                  |                | X                       | Y         | Z        |
| 1                | 6                | 0              | 0.138828                | -0.760618 | 0.000000 |
| 2                | 6                | 0              | 0.000000                | 0.656558  | 0.000000 |
| 3                | 6                | 0              | 1.210897                | 1.327877  | 0.000000 |
| 4                | 6                | 0              | 2.287206                | 0.728326  | 0.000000 |
| 5                | 6                | 0              | 2.592221                | -0.623124 | 0.000000 |
| 6                | 6                | 0              | 1.415287                | -1.366876 | 0.000000 |
| 7                | 6                | 0              | -1.150752               | -1.392592 | 0.000000 |
| 8                | 6                | 0              | -2.170016               | -0.506603 | 0.000000 |
| 9                | 1                | 0              | 3.572351                | -1.075186 | 0.000000 |
| 10               | 1                | 0              | 1.480334                | -2.448962 | 0.000000 |
| 11               | 1                | 0              | -1.294938               | -2.463949 | 0.000000 |
| 12               | 1                | 0              | -3.226260               | -0.725528 | 0.000000 |
| 13               | 16               | 0              | -1.654594               | 1.145996  | 0.000000 |

---

TS for 21 → 24 with Furan: E[M06-2X/6-311+G(2df,p)] = -631.75594 E<sub>h</sub>

| Center<br>Number | Atomic<br>Number | Atomic<br>Type | Coordinates (Angstroms) |           |           |
|------------------|------------------|----------------|-------------------------|-----------|-----------|
|                  |                  |                | X                       | Y         | Z         |
| 1                | 6                | 0              | -0.902528               | -0.768261 | -0.056686 |
| 2                | 6                | 0              | -1.787548               | 0.351528  | -0.003352 |
| 3                | 6                | 0              | -1.357068               | 1.688480  | 0.000304  |
| 4                | 6                | 0              | 0.006391                | 1.964854  | -0.049931 |
| 5                | 6                | 0              | 0.780389                | 0.812655  | -0.100961 |
| 6                | 6                | 0              | 0.442006                | -0.395552 | -0.097758 |
| 7                | 6                | 0              | -1.714372               | -1.941093 | -0.041244 |
| 8                | 6                | 0              | -3.009842               | -1.514813 | 0.019179  |
| 9                | 1                | 0              | -2.073831               | 2.500243  | 0.040865  |
| 10               | 1                | 0              | 0.378138                | 2.981098  | -0.053987 |
| 11               | 1                | 0              | -1.384695               | -2.965683 | -0.071903 |
| 12               | 1                | 0              | -3.924031               | -2.087307 | 0.048042  |
| 13               | 7                | 0              | -3.067281               | -0.143580 | 0.043914  |
| 14               | 6                | 0              | -4.263990               | 0.658189  | 0.107946  |
| 15               | 1                | 0              | -5.130425               | 0.000231  | 0.134594  |
| 16               | 1                | 0              | -4.265565               | 1.278363  | 1.006939  |
| 17               | 1                | 0              | -4.341555               | 1.306432  | -0.767592 |
| 18               | 6                | 0              | 2.978604                | -1.274467 | -0.300569 |
| 19               | 6                | 0              | 3.226523                | -0.883254 | 0.990362  |
| 20               | 6                | 0              | 3.328487                | 0.514003  | 0.954950  |
| 21               | 6                | 0              | 3.109288                | 0.878522  | -0.355184 |
| 22               | 8                | 0              | 3.049801                | -0.224062 | -1.131638 |
| 23               | 1                | 0              | 2.871722                | -2.241951 | -0.759643 |
| 24               | 1                | 0              | 3.258339                | -1.527967 | 1.852004  |
| 25               | 1                | 0              | 3.458335                | 1.189895  | 1.783553  |
| 26               | 1                | 0              | 3.208083                | 1.819450  | -0.869509 |



TS for **21** → **24a** with tBu-Furan: E[M06-2X/6-311+G(2df,p)] = -788.99060 E<sub>h</sub>

| Center<br>Number | Atomic<br>Number | Atomic<br>Type | Coordinates (Angstroms) |           |           |
|------------------|------------------|----------------|-------------------------|-----------|-----------|
|                  |                  |                | X                       | Y         | Z         |
| 1                | 6                | 0              | 1.502760                | -0.509586 | 0.201346  |
| 2                | 6                | 0              | 2.706739                | 0.216602  | -0.048398 |
| 3                | 6                | 0              | 0.448638                | 1.522447  | -0.103505 |
| 4                | 6                | 0              | 0.367760                | 0.301095  | 0.152416  |
| 5                | 6                | 0              | 1.873279                | -1.868457 | 0.426940  |
| 6                | 6                | 0              | 3.233318                | -1.921433 | 0.313797  |
| 7                | 1                | 0              | 1.223191                | -2.699303 | 0.644933  |
| 8                | 1                | 0              | 3.901535                | -2.762664 | 0.414290  |
| 9                | 7                | 0              | 3.744178                | -0.679603 | 0.031602  |
| 10               | 6                | 0              | 5.136326                | -0.353983 | -0.157199 |
| 11               | 1                | 0              | 5.731656                | -1.256302 | -0.031971 |
| 12               | 1                | 0              | 5.307026                | 0.044039  | -1.159788 |
| 13               | 1                | 0              | 5.461537                | 0.386773  | 0.576376  |
| 14               | 6                | 0              | -1.864596               | 2.306642  | -0.299093 |
| 15               | 6                | 0              | -2.028409               | 2.252235  | 1.059960  |
| 16               | 6                | 0              | -2.341807               | 0.914789  | 1.359225  |
| 17               | 6                | 0              | -2.372546               | 0.241900  | 0.161943  |
| 18               | 8                | 0              | -2.191961               | 1.116452  | -0.848268 |
| 19               | 1                | 0              | -1.704282               | 3.121494  | -0.984142 |
| 20               | 1                | 0              | -1.860360               | 3.062939  | 1.749156  |
| 21               | 1                | 0              | -2.465522               | 0.474098  | 2.333914  |
| 22               | 6                | 0              | -2.759720               | -1.160838 | -0.202755 |
| 23               | 6                | 0              | -4.250627               | -1.167517 | -0.581547 |
| 24               | 1                | 0              | -4.864941               | -0.822700 | 0.252271  |
| 25               | 1                | 0              | -4.433862               | -0.515075 | -1.437073 |
| 26               | 1                | 0              | -4.562871               | -2.179881 | -0.848063 |
| 27               | 6                | 0              | -2.528351               | -2.068790 | 1.005003  |
| 28               | 1                | 0              | -2.780397               | -3.098675 | 0.744527  |
| 29               | 1                | 0              | -1.482411               | -2.031723 | 1.317113  |
| 30               | 1                | 0              | -3.153384               | -1.775141 | 1.850933  |
| 31               | 6                | 0              | 1.557532                | 2.318991  | -0.358786 |
| 32               | 1                | 0              | 1.546938                | 3.379330  | -0.572930 |
| 33               | 6                | 0              | 2.746300                | 1.594331  | -0.322000 |
| 34               | 1                | 0              | 3.690237                | 2.093679  | -0.506723 |
| 35               | 6                | 0              | -1.932806               | -1.657995 | -1.392394 |
| 36               | 1                | 0              | -0.872346               | -1.698121 | -1.139890 |
| 37               | 1                | 0              | -2.267115               | -2.659201 | -1.673421 |
| 38               | 1                | 0              | -2.050920               | -1.000571 | -2.254305 |

TS for **21** → **24b** with tBu-Furan: E[M06-2X/6-311+G(2df,p)] = -788.98956 E<sub>h</sub>

| Center<br>Number | Atomic<br>Number | Atomic<br>Type | Coordinates (Angstroms) |           |           |
|------------------|------------------|----------------|-------------------------|-----------|-----------|
|                  |                  |                | X                       | Y         | Z         |
| 1                | 6                | 0              | 2.029785                | 0.721482  | -0.138451 |
| 2                | 6                | 0              | 2.719173                | -0.513391 | 0.062507  |
| 3                | 6                | 0              | 2.077736                | -1.728237 | 0.356729  |
| 4                | 6                | 0              | 0.690711                | -1.763335 | 0.467332  |
| 5                | 6                | 0              | 0.075980                | -0.524411 | 0.272188  |
| 6                | 6                | 0              | 0.659868                | 0.548533  | 0.003542  |
| 7                | 6                | 0              | 3.014250                | 1.712595  | -0.421159 |
| 8                | 6                | 0              | 4.222179                | 1.076200  | -0.382031 |
| 9                | 1                | 0              | 2.656280                | -2.633819 | 0.498842  |
| 10               | 1                | 0              | 0.176490                | -2.690719 | 0.688331  |
| 11               | 1                | 0              | 2.855358                | 2.757996  | -0.624574 |
| 12               | 1                | 0              | 5.213879                | 1.470956  | -0.539655 |
| 13               | 7                | 0              | 4.059363                | -0.254627 | -0.093150 |
| 14               | 6                | 0              | 5.109746                | -1.235906 | 0.025346  |
| 15               | 1                | 0              | 6.068924                | -0.750542 | -0.143897 |
| 16               | 1                | 0              | 5.110901                | -1.680059 | 1.022932  |
| 17               | 1                | 0              | 4.981194                | -2.029398 | -0.713849 |
| 18               | 6                | 0              | -1.158060               | 2.191599  | -0.251314 |
| 19               | 6                | 0              | -1.383149               | 2.199127  | 1.101528  |
| 20               | 6                | 0              | -2.168376               | 1.067339  | 1.367960  |
| 21               | 6                | 0              | -2.394155               | 0.450045  | 0.157880  |
| 22               | 8                | 0              | -1.881666               | 1.210319  | -0.831177 |
| 23               | 1                | 0              | -0.683750               | 2.892741  | -0.916262 |
| 24               | 1                | 0              | -0.953768               | 2.888814  | 1.808842  |
| 25               | 1                | 0              | -2.479979               | 0.698837  | 2.330785  |
| 26               | 6                | 0              | -3.278129               | -0.695202 | -0.241784 |
| 27               | 6                | 0              | -4.667001               | -0.134055 | -0.591691 |
| 28               | 1                | 0              | -4.599267               | 0.574048  | -1.419470 |
| 29               | 1                | 0              | -5.333973               | -0.946911 | -0.888250 |
| 30               | 1                | 0              | -5.105549               | 0.379834  | 0.265645  |
| 31               | 6                | 0              | -3.394934               | -1.666057 | 0.933344  |
| 32               | 1                | 0              | -4.019706               | -2.514995 | 0.648791  |
| 33               | 1                | 0              | -2.410337               | -2.037525 | 1.224636  |
| 34               | 1                | 0              | -3.854882               | -1.188760 | 1.801079  |
| 35               | 6                | 0              | -2.703808               | -1.419981 | -1.462190 |
| 36               | 1                | 0              | -1.724808               | -1.845018 | -1.237516 |
| 37               | 1                | 0              | -3.379671               | -2.225434 | -1.757735 |
| 38               | 1                | 0              | -2.590454               | -0.738281 | -2.305630 |

TS for 22 → 25 with Furan: E[M06-2X/6-311+G(2df,p)] = -631.75330 E<sub>h</sub>

| Center<br>Number | Atomic<br>Number | Atomic<br>Type | Coordinates (Angstroms) |           |           |
|------------------|------------------|----------------|-------------------------|-----------|-----------|
|                  |                  |                | X                       | Y         | Z         |
| 1                | 6                | 0              | -1.448783               | 1.108919  | -0.014856 |
| 2                | 6                | 0              | -1.684061               | -0.299342 | -0.018709 |
| 3                | 6                | 0              | -0.661507               | -1.268762 | -0.067932 |
| 4                | 6                | 0              | 0.580159                | -0.678076 | -0.106638 |
| 5                | 6                | 0              | 0.766073                | 0.573074  | -0.108819 |
| 6                | 6                | 0              | -0.126645               | 1.606391  | -0.062783 |
| 7                | 6                | 0              | -2.736549               | 1.735429  | 0.045137  |
| 8                | 6                | 0              | -3.662340               | 0.737238  | 0.075680  |
| 9                | 1                | 0              | -0.872312               | -2.331986 | -0.069206 |
| 10               | 1                | 0              | 0.096790                | 2.666069  | -0.067164 |
| 11               | 1                | 0              | -2.945428               | 2.792043  | 0.063543  |
| 12               | 1                | 0              | -4.739300               | 0.793239  | 0.121176  |
| 13               | 7                | 0              | -3.043792               | -0.489131 | 0.038441  |
| 14               | 6                | 0              | -3.690150               | -1.776882 | 0.051711  |
| 15               | 1                | 0              | -4.767844               | -1.631983 | 0.095125  |
| 16               | 1                | 0              | -3.447633               | -2.340997 | -0.851773 |
| 17               | 1                | 0              | -3.378254               | -2.357851 | 0.922710  |
| 18               | 6                | 0              | 3.243529                | -1.218557 | -0.289577 |
| 19               | 6                | 0              | 3.422733                | -0.789160 | 0.998473  |
| 20               | 6                | 0              | 3.345035                | 0.611747  | 0.951003  |
| 21               | 6                | 0              | 3.101333                | 0.934249  | -0.363252 |
| 22               | 8                | 0              | 3.177369                | -0.173866 | -1.129152 |
| 23               | 1                | 0              | 3.262698                | -2.195085 | -0.741476 |
| 24               | 1                | 0              | 3.532215                | -1.416865 | 1.866278  |
| 25               | 1                | 0              | 3.381471                | 1.305453  | 1.774161  |
| 26               | 1                | 0              | 3.072231                | 1.875192  | -0.885873 |

TS for **22** → **25a** with tBu-Furan: E[M06-2X/6-311+G(2df,p)] = -788.98675 E<sub>h</sub>

| Center<br>Number | Atomic<br>Number | Atomic<br>Type | Coordinates (Angstroms) |           |           |
|------------------|------------------|----------------|-------------------------|-----------|-----------|
|                  |                  |                | X                       | Y         | Z         |
| 1                | 6                | 0              | 2.227488                | -1.138967 | 0.252892  |
| 2                | 6                | 0              | 2.713682                | 0.163919  | -0.071995 |
| 3                | 6                | 0              | 1.882434                | 1.286953  | -0.267151 |
| 4                | 6                | 0              | 0.574265                | 0.921459  | -0.088353 |
| 5                | 6                | 0              | 0.117299                | -0.217470 | 0.201042  |
| 6                | 6                | 0              | 0.840270                | -1.367352 | 0.397451  |
| 7                | 6                | 0              | 3.381409                | -1.983055 | 0.364990  |
| 8                | 6                | 0              | 4.470183                | -1.204797 | 0.116343  |
| 9                | 1                | 0              | 2.265494                | 2.267238  | -0.523608 |
| 10               | 1                | 0              | 0.445722                | -2.349350 | 0.632465  |
| 11               | 1                | 0              | 3.396544                | -3.034208 | 0.600235  |
| 12               | 1                | 0              | 5.518104                | -1.463114 | 0.102501  |
| 13               | 7                | 0              | 4.082855                | 0.087837  | -0.147647 |
| 14               | 6                | 0              | 4.948389                | 1.197007  | -0.457548 |
| 15               | 1                | 0              | 5.981318                | 0.854737  | -0.444873 |
| 16               | 1                | 0              | 4.724093                | 1.599116  | -1.448341 |
| 17               | 1                | 0              | 4.834209                | 1.995100  | 0.279759  |
| 18               | 6                | 0              | -1.517488               | 2.329808  | -0.269629 |
| 19               | 6                | 0              | -1.681869               | 2.287290  | 1.088458  |
| 20               | 6                | 0              | -2.284687               | 1.048143  | 1.365527  |
| 21               | 6                | 0              | -2.469204               | 0.420086  | 0.155835  |
| 22               | 8                | 0              | -2.100341               | 1.254089  | -0.838947 |
| 23               | 1                | 0              | -1.334126               | 3.025913  | 1.791059  |
| 24               | 1                | 0              | -2.505407               | 0.629248  | 2.332867  |
| 25               | 6                | 0              | -3.197974               | -0.833637 | -0.231478 |
| 26               | 6                | 0              | -3.152884               | -1.815540 | 0.939390  |
| 27               | 1                | 0              | -3.654480               | -1.409305 | 1.820127  |
| 28               | 1                | 0              | -3.660771               | -2.741578 | 0.662967  |
| 29               | 1                | 0              | -2.120471               | -2.049422 | 1.207114  |
| 30               | 6                | 0              | -4.658522               | -0.465380 | -0.543665 |
| 31               | 1                | 0              | -4.708437               | 0.246860  | -1.369139 |
| 32               | 1                | 0              | -5.216152               | -1.360781 | -0.827928 |
| 33               | 1                | 0              | -5.140861               | -0.017516 | 0.327090  |
| 34               | 6                | 0              | -2.561844               | -1.468976 | -1.471057 |
| 35               | 1                | 0              | -1.530178               | -1.762256 | -1.273619 |
| 36               | 1                | 0              | -3.131873               | -2.355317 | -1.757973 |
| 37               | 1                | 0              | -2.560768               | -0.773622 | -2.311014 |
| 38               | 1                | 0              | -1.164901               | 3.093743  | -0.940890 |

TS for **22** → **25b** with tBu-Furan: E[M06-2X/6-311+G(2df,p)] = -788.98730 E<sub>h</sub>

| Center<br>Number | Atomic<br>Number | Atomic<br>Type | Coordinates (Angstroms) |           |           |
|------------------|------------------|----------------|-------------------------|-----------|-----------|
|                  |                  |                | X                       | Y         | Z         |
| 1                | 6                | 0              | 2.746712                | -1.015808 | -0.207966 |
| 2                | 6                | 0              | 2.562155                | 0.375222  | 0.058872  |
| 3                | 6                | 0              | 1.303350                | 0.979986  | 0.252721  |
| 4                | 6                | 0              | 0.286893                | 0.055649  | 0.160950  |
| 5                | 6                | 0              | 0.481195                | -1.166574 | -0.084315 |
| 6                | 6                | 0              | 1.628401                | -1.876975 | -0.291825 |
| 7                | 6                | 0              | 4.159480                | -1.220310 | -0.337718 |
| 8                | 6                | 0              | 4.754177                | -0.009394 | -0.152475 |
| 9                | 1                | 0              | 1.195876                | 2.040881  | 0.451364  |
| 10               | 1                | 0              | 1.719464                | -2.935496 | -0.500340 |
| 11               | 1                | 0              | 4.665902                | -2.148952 | -0.541455 |
| 12               | 1                | 0              | 5.799722                | 0.258133  | -0.171159 |
| 13               | 7                | 0              | 3.806841                | 0.956554  | 0.087086  |
| 14               | 6                | 0              | 4.050359                | 2.356451  | 0.326428  |
| 15               | 1                | 0              | 5.122520                | 2.540142  | 0.294641  |
| 16               | 1                | 0              | 3.565934                | 2.969993  | -0.436656 |
| 17               | 1                | 0              | 3.672074                | 2.652732  | 1.307502  |
| 18               | 6                | 0              | -2.539956               | -0.297042 | 0.174434  |
| 19               | 6                | 0              | -2.388987               | -0.967502 | 1.360422  |
| 20               | 6                | 0              | -1.859619               | -2.233789 | 1.041346  |
| 21               | 6                | 0              | -1.698792               | -2.244068 | -0.317296 |
| 22               | 8                | 0              | -2.207189               | -1.110313 | -0.848582 |
| 23               | 1                | 0              | -2.583778               | -0.568540 | 2.341323  |
| 24               | 1                | 0              | -1.561237               | -3.016401 | 1.718832  |
| 25               | 1                | 0              | -1.406267               | -3.010016 | -1.014994 |
| 26               | 6                | 0              | -3.144160               | 1.030297  | -0.174487 |
| 27               | 6                | 0              | -4.599502               | 0.799162  | -0.615675 |
| 28               | 1                | 0              | -5.066068               | 1.752348  | -0.874698 |
| 29               | 1                | 0              | -4.638380               | 0.148491  | -1.490943 |
| 30               | 1                | 0              | -5.178929               | 0.335153  | 0.184599  |
| 31               | 6                | 0              | -3.114324               | 1.929919  | 1.060641  |
| 32               | 1                | 0              | -2.089141               | 2.067256  | 1.411143  |
| 33               | 1                | 0              | -3.532881               | 2.907546  | 0.813809  |
| 34               | 1                | 0              | -3.706619               | 1.508327  | 1.875451  |
| 35               | 6                | 0              | -2.367101               | 1.690427  | -1.317756 |
| 36               | 1                | 0              | -2.847321               | 2.633719  | -1.587443 |
| 37               | 1                | 0              | -1.336619               | 1.888505  | -1.020483 |
| 38               | 1                | 0              | -2.346326               | 1.048900  | -2.199247 |

TS for **23** → **26** with Furan: E[M06-2X/6-311+G(2df,p)] = -631.75974 E<sub>h</sub>

| Center<br>Number | Atomic<br>Number | Atomic<br>Type | Coordinates (Angstroms) |           |           |
|------------------|------------------|----------------|-------------------------|-----------|-----------|
|                  |                  |                | X                       | Y         | Z         |
| 1                | 6                | 0              | 1.931655                | -1.103771 | 0.024792  |
| 2                | 6                | 0              | 1.283304                | 0.164329  | -0.012910 |
| 3                | 6                | 0              | -0.108468               | 0.228893  | -0.059201 |
| 4                | 6                | 0              | -0.674024               | -0.899900 | -0.091326 |
| 5                | 6                | 0              | -0.226485               | -2.212021 | -0.052135 |
| 6                | 6                | 0              | 1.160897                | -2.281417 | 0.006821  |
| 7                | 6                | 0              | 3.335697                | -0.833449 | 0.086345  |
| 8                | 6                | 0              | 3.478509                | 0.523627  | 0.082786  |
| 9                | 1                | 0              | -0.849690               | -3.095361 | -0.078242 |
| 10               | 1                | 0              | 1.644892                | -3.250651 | 0.033874  |
| 11               | 1                | 0              | 4.139487                | -1.549496 | 0.136613  |
| 12               | 1                | 0              | 4.375080                | 1.122968  | 0.118444  |
| 13               | 7                | 0              | 2.249876                | 1.135104  | 0.032211  |
| 14               | 6                | 0              | 1.999306                | 2.552030  | -0.064258 |
| 15               | 1                | 0              | 2.756296                | 3.097659  | 0.498013  |
| 16               | 1                | 0              | 2.010110                | 2.889980  | -1.103106 |
| 17               | 1                | 0              | 1.018086                | 2.759481  | 0.361127  |
| 18               | 6                | 0              | -2.703929               | 1.460891  | -0.223315 |
| 19               | 6                | 0              | -2.964022               | 0.979878  | 1.028731  |
| 20               | 6                | 0              | -3.103380               | -0.411198 | 0.881822  |
| 21               | 6                | 0              | -2.888125               | -0.678635 | -0.451680 |
| 22               | 8                | 0              | -2.768773               | 0.481161  | -1.134618 |
| 23               | 1                | 0              | -2.538233               | 2.454522  | -0.602655 |
| 24               | 1                | 0              | -2.988450               | 1.554221  | 1.938686  |
| 25               | 1                | 0              | -3.264728               | -1.146106 | 1.652891  |
| 26               | 1                | 0              | -3.027411               | -1.567791 | -1.043013 |

TS for **23** → **26a** with Me-Furan: E[M06-2X/6-311+G(2df,p)] = -671.07348 E<sub>h</sub>

| Center<br>Number | Atomic<br>Number | Atomic<br>Type | Coordinates (Angstroms) |           |           |
|------------------|------------------|----------------|-------------------------|-----------|-----------|
|                  |                  |                | X                       | Y         | Z         |
| 1                | 6                | 0              | 2.024658                | -1.204534 | 0.106200  |
| 2                | 6                | 0              | 1.518920                | 0.122785  | 0.000260  |
| 3                | 6                | 0              | 0.144238                | 0.343105  | 0.036096  |
| 4                | 6                | 0              | -0.554531               | -0.707461 | 0.134765  |
| 5                | 6                | 0              | -0.243166               | -2.054841 | 0.257439  |
| 6                | 6                | 0              | 1.128491                | -2.281357 | 0.237813  |
| 7                | 6                | 0              | 3.450955                | -1.094587 | 0.056850  |
| 8                | 6                | 0              | 3.742005                | 0.232304  | -0.072801 |
| 9                | 1                | 0              | -0.954616               | -2.864668 | 0.344431  |
| 10               | 1                | 0              | 1.502499                | -3.295113 | 0.321298  |
| 11               | 1                | 0              | 4.172489                | -1.892682 | 0.118670  |
| 12               | 1                | 0              | 4.699442                | 0.724723  | -0.144887 |
| 13               | 7                | 0              | 2.587748                | 0.975862  | -0.098961 |
| 14               | 6                | 0              | 2.487605                | 2.400126  | -0.300469 |
| 15               | 1                | 0              | 3.346110                | 2.895649  | 0.151519  |
| 16               | 1                | 0              | 2.445859                | 2.651848  | -1.362863 |
| 17               | 1                | 0              | 1.575933                | 2.754704  | 0.179237  |
| 18               | 6                | 0              | -2.152864               | 1.867543  | -0.154559 |
| 19               | 6                | 0              | -2.442088               | 1.540887  | 1.141799  |
| 20               | 6                | 0              | -2.820228               | 0.191194  | 1.115589  |
| 21               | 6                | 0              | -2.726181               | -0.225886 | -0.201168 |
| 22               | 8                | 0              | -2.447807               | 0.850393  | -0.978010 |
| 23               | 1                | 0              | -1.837274               | 2.784344  | -0.621947 |
| 24               | 1                | 0              | -2.312509               | 2.176159  | 2.001088  |
| 25               | 1                | 0              | -3.065152               | -0.445190 | 1.950608  |
| 26               | 6                | 0              | -3.228826               | -1.441187 | -0.894733 |
| 27               | 1                | 0              | -3.300568               | -2.263890 | -0.184712 |
| 28               | 1                | 0              | -2.556578               | -1.729402 | -1.702323 |
| 29               | 1                | 0              | -4.221337               | -1.259206 | -1.311790 |

TS for **23** → **26b** with Me-Furan: E[M06-2X/6-311+G(2df,p)] = -671.07390 E<sub>h</sub>

| Center<br>Number | Atomic<br>Number | Atomic<br>Type | Coordinates (Angstroms) |           |           |
|------------------|------------------|----------------|-------------------------|-----------|-----------|
|                  |                  |                | X                       | Y         | Z         |
| 1                | 6                | 0              | 2.332546                | -0.982981 | -0.044976 |
| 2                | 6                | 0              | 1.495461                | 0.168179  | 0.024320  |
| 3                | 6                | 0              | 0.109774                | 0.005568  | 0.017128  |
| 4                | 6                | 0              | -0.257416               | -1.189753 | -0.068402 |
| 5                | 6                | 0              | 0.370854                | -2.420403 | -0.136698 |
| 6                | 6                | 0              | 1.754731                | -2.265026 | -0.122076 |
| 7                | 6                | 0              | 3.678769                | -0.497264 | -0.008517 |
| 8                | 6                | 0              | 3.608509                | 0.862619  | 0.076809  |
| 9                | 1                | 0              | -0.108551               | -3.386447 | -0.201235 |
| 10               | 1                | 0              | 2.385834                | -3.144538 | -0.173921 |
| 11               | 1                | 0              | 4.585856                | -1.078527 | -0.032670 |
| 12               | 1                | 0              | 4.401416                | 1.592664  | 0.126575  |
| 13               | 7                | 0              | 2.297744                | 1.274515  | 0.105748  |
| 14               | 6                | 0              | 1.822251                | 2.635965  | 0.112943  |
| 15               | 1                | 0              | 2.528220                | 3.267206  | 0.651085  |
| 16               | 1                | 0              | 1.698044                | 3.020776  | -0.902109 |
| 17               | 1                | 0              | 0.858007                | 2.665717  | 0.619913  |
| 18               | 6                | 0              | -2.759609               | 0.868961  | -0.027132 |
| 19               | 6                | 0              | -2.894372               | 0.245023  | 1.176760  |
| 20               | 6                | 0              | -2.853777               | -1.145659 | 0.912403  |
| 21               | 6                | 0              | -2.686822               | -1.267448 | -0.436842 |
| 22               | 8                | 0              | -2.698687               | -0.046981 | -1.016095 |
| 23               | 1                | 0              | -2.965426               | 0.732220  | 2.134545  |
| 24               | 1                | 0              | -2.895738               | -1.956203 | 1.620825  |
| 25               | 1                | 0              | -2.674343               | -2.113087 | -1.102911 |
| 26               | 6                | 0              | -2.738853               | 2.295048  | -0.433074 |
| 27               | 1                | 0              | -1.865689               | 2.500079  | -1.052736 |
| 28               | 1                | 0              | -3.632694               | 2.549677  | -1.006660 |
| 29               | 1                | 0              | -2.701940               | 2.927745  | 0.451953  |



TS for **23** → **26a** with Et-Furan: E[M06-2X/6-311+G(2df,p)] = -710.37823 E<sub>h</sub>

| Center<br>Number | Atomic<br>Number | Atomic<br>Type | Coordinates (Angstroms) |           |           |
|------------------|------------------|----------------|-------------------------|-----------|-----------|
|                  |                  |                | X                       | Y         | Z         |
| 1                | 6                | 0              | 2.274471                | -1.287827 | 0.115812  |
| 2                | 6                | 0              | 1.859659                | 0.066788  | -0.031375 |
| 3                | 6                | 0              | 0.509815                | 0.390458  | 0.083644  |
| 4                | 6                | 0              | -0.251581               | -0.597451 | 0.289637  |
| 5                | 6                | 0              | -0.032321               | -1.956578 | 0.467692  |
| 6                | 6                | 0              | 1.314978                | -2.285750 | 0.368444  |
| 7                | 6                | 0              | 3.697739                | -1.289319 | -0.035805 |
| 8                | 6                | 0              | 4.073909                | 0.003081  | -0.259952 |
| 9                | 1                | 0              | -0.792296               | -2.704228 | 0.648571  |
| 10               | 1                | 0              | 1.620569                | -3.319155 | 0.483661  |
| 11               | 1                | 0              | 4.362193                | -2.135823 | 0.021979  |
| 12               | 1                | 0              | 5.056851                | 0.416774  | -0.424398 |
| 13               | 7                | 0              | 2.977407                | 0.829954  | -0.250743 |
| 14               | 6                | 0              | 2.967508                | 2.245394  | -0.525941 |
| 15               | 1                | 0              | 3.876907                | 2.702041  | -0.136680 |
| 16               | 1                | 0              | 2.896370                | 2.444028  | -1.597954 |
| 17               | 1                | 0              | 2.104245                | 2.687594  | -0.029880 |
| 18               | 6                | 0              | -1.702202               | 2.080904  | -0.037358 |
| 19               | 6                | 0              | -1.917671               | 1.841490  | 1.290921  |
| 20               | 6                | 0              | -2.389026               | 0.521693  | 1.365384  |
| 21               | 6                | 0              | -2.418383               | 0.032867  | 0.071534  |
| 22               | 8                | 0              | -2.118099               | 1.044484  | -0.781109 |
| 23               | 1                | 0              | -1.356780               | 2.946812  | -0.575441 |
| 24               | 1                | 0              | -1.685986               | 2.509433  | 2.102694  |
| 25               | 1                | 0              | -2.618087               | -0.051719 | 2.249267  |
| 26               | 6                | 0              | -3.061713               | -1.173664 | -0.520094 |
| 27               | 6                | 0              | -4.480518               | -0.882795 | -1.013700 |
| 28               | 1                | 0              | -5.114098               | -0.543761 | -0.193017 |
| 29               | 1                | 0              | -4.467538               | -0.103606 | -1.776108 |
| 30               | 1                | 0              | -4.927115               | -1.777869 | -1.447474 |
| 31               | 1                | 0              | -3.079083               | -1.951165 | 0.246025  |
| 32               | 1                | 0              | -2.441191               | -1.540668 | -1.340234 |

TS for **23** → **26b** with Et-Furan: E[M06-2X/6-311+G(2df,p)] = -710.37834 E<sub>h</sub>

| Center<br>Number | Atomic<br>Number | Atomic<br>Type | Coordinates (Angstroms) |           |           |
|------------------|------------------|----------------|-------------------------|-----------|-----------|
|                  |                  |                | X                       | Y         | Z         |
| 1                | 6                | 0              | 2.769371                | -0.682530 | -0.164307 |
| 2                | 6                | 0              | 1.746273                | 0.289854  | 0.031466  |
| 3                | 6                | 0              | 0.414331                | -0.122187 | 0.069725  |
| 4                | 6                | 0              | 0.259035                | -1.354707 | -0.095246 |
| 5                | 6                | 0              | 1.092490                | -2.442339 | -0.287776 |
| 6                | 6                | 0              | 2.425235                | -2.039427 | -0.318933 |
| 7                | 6                | 0              | 4.007716                | 0.035738  | -0.145223 |
| 8                | 6                | 0              | 3.701639                | 1.350748  | 0.051395  |
| 9                | 1                | 0              | 0.790491                | -3.472595 | -0.408823 |
| 10               | 1                | 0              | 3.198954                | -2.783746 | -0.466925 |
| 11               | 1                | 0              | 5.001034                | -0.367815 | -0.253519 |
| 12               | 1                | 0              | 4.353635                | 2.207194  | 0.125947  |
| 13               | 7                | 0              | 2.342138                | 1.514826  | 0.167603  |
| 14               | 6                | 0              | 1.633208                | 2.763272  | 0.303964  |
| 15               | 1                | 0              | 2.235267                | 3.465898  | 0.878817  |
| 16               | 1                | 0              | 1.403668                | 3.200684  | -0.670617 |
| 17               | 1                | 0              | 0.699192                | 2.576336  | 0.833400  |
| 18               | 6                | 0              | -2.540801               | 0.232064  | 0.220075  |
| 19               | 6                | 0              | -2.505154               | -0.486871 | 1.377942  |
| 20               | 6                | 0              | -2.250162               | -1.829250 | 1.007425  |
| 21               | 6                | 0              | -2.140822               | -1.829656 | -0.353521 |
| 22               | 8                | 0              | -2.388469               | -0.593169 | -0.837599 |
| 23               | 1                | 0              | -2.600415               | -0.084152 | 2.372321  |
| 24               | 1                | 0              | -2.116476               | -2.681201 | 1.653150  |
| 25               | 1                | 0              | -2.025851               | -2.614660 | -1.081251 |
| 26               | 6                | 0              | -2.795713               | 1.665056  | -0.080039 |
| 27               | 1                | 0              | -1.993802               | 2.034059  | -0.723626 |
| 28               | 1                | 0              | -2.739679               | 2.217693  | 0.859219  |
| 29               | 6                | 0              | -4.152439               | 1.886964  | -0.753492 |
| 30               | 1                | 0              | -4.305917               | 2.944137  | -0.971742 |
| 31               | 1                | 0              | -4.208782               | 1.332815  | -1.690635 |
| 32               | 1                | 0              | -4.963771               | 1.546546  | -0.108875 |

TS for **23** → **26a** with iPr-Furan: E[M06-2X/6-311+G(2df,p)] = -749.68483 E<sub>h</sub>

| Center<br>Number | Atomic<br>Number | Atomic<br>Type | Coordinates (Angstroms) |           |           |
|------------------|------------------|----------------|-------------------------|-----------|-----------|
|                  |                  |                | X                       | Y         | Z         |
| 1                | 6                | 0              | 2.397185                | -1.381735 | 0.019881  |
| 2                | 6                | 0              | 2.074091                | 0.005167  | -0.000241 |
| 3                | 6                | 0              | 0.743701                | 0.385699  | 0.132915  |
| 4                | 6                | 0              | -0.093777               | -0.550035 | 0.253715  |
| 5                | 6                | 0              | 0.045106                | -1.932101 | 0.290543  |
| 6                | 6                | 0              | 1.371423                | -2.333572 | 0.166158  |
| 7                | 6                | 0              | 3.819134                | -1.460404 | -0.130377 |
| 8                | 6                | 0              | 4.279744                | -0.180269 | -0.231896 |
| 9                | 1                | 0              | -0.757127               | -2.651215 | 0.383924  |
| 10               | 1                | 0              | 1.609149                | -3.391016 | 0.176495  |
| 11               | 1                | 0              | 4.427358                | -2.349774 | -0.151320 |
| 12               | 1                | 0              | 5.288399                | 0.182635  | -0.354931 |
| 13               | 7                | 0              | 3.238145                | 0.712072  | -0.146790 |
| 14               | 6                | 0              | 3.317165                | 2.144592  | -0.289879 |
| 15               | 1                | 0              | 3.187511                | 2.450102  | -1.330975 |
| 16               | 1                | 0              | 2.529417                | 2.600254  | 0.309677  |
| 17               | 1                | 0              | 4.284821                | 2.494417  | 0.067520  |
| 18               | 6                | 0              | -1.148241               | 2.258299  | -0.116670 |
| 19               | 6                | 0              | -1.451821               | 2.118794  | 1.212081  |
| 20               | 6                | 0              | -2.144034               | 0.906333  | 1.317785  |
| 21               | 6                | 0              | -2.210270               | 0.370183  | 0.042686  |
| 22               | 8                | 0              | -1.723593               | 1.283380  | -0.836272 |
| 23               | 1                | 0              | -0.657721               | 3.038330  | -0.673312 |
| 24               | 1                | 0              | -1.137823               | 2.774294  | 2.006447  |
| 25               | 1                | 0              | -2.490746               | 0.423057  | 2.216310  |
| 26               | 6                | 0              | -3.017689               | -0.757054 | -0.521340 |
| 27               | 6                | 0              | -4.174643               | -0.216160 | -1.367061 |
| 28               | 1                | 0              | -4.843885               | 0.388847  | -0.751013 |
| 29               | 1                | 0              | -3.808599               | 0.403051  | -2.185433 |
| 30               | 1                | 0              | -4.749314               | -1.042713 | -1.788518 |
| 31               | 1                | 0              | -2.361848               | -1.344902 | -1.170821 |
| 32               | 6                | 0              | -3.535605               | -1.646826 | 0.604709  |
| 33               | 1                | 0              | -4.027395               | -2.528226 | 0.191976  |
| 34               | 1                | 0              | -2.731397               | -1.977438 | 1.263793  |
| 35               | 1                | 0              | -4.267879               | -1.106707 | 1.209845  |

TS for **23** → **26b** with iPr-Furan: E[M06-2X/6-311+G(2df,p)] = -749.68597 E<sub>h</sub>

| Center<br>Number | Atomic<br>Number | Atomic<br>Type | Coordinates (Angstroms) |           |           |
|------------------|------------------|----------------|-------------------------|-----------|-----------|
|                  |                  |                | X                       | Y         | Z         |
| 1                | 6                | 0              | 3.006829                | -0.550702 | -0.085989 |
| 2                | 6                | 0              | 1.883085                | 0.321840  | -0.004728 |
| 3                | 6                | 0              | 0.598729                | -0.222181 | 0.027585  |
| 4                | 6                | 0              | 0.578863                | -1.473398 | -0.043093 |
| 5                | 6                | 0              | 1.524164                | -2.480482 | -0.119588 |
| 6                | 6                | 0              | 2.809259                | -1.944128 | -0.139275 |
| 7                | 6                | 0              | 4.163978                | 0.292125  | -0.089515 |
| 8                | 6                | 0              | 3.718497                | 1.579542  | -0.015720 |
| 9                | 1                | 0              | 1.332713                | -3.542637 | -0.167488 |
| 10               | 1                | 0              | 3.660041                | -2.612646 | -0.200961 |
| 11               | 1                | 0              | 5.196602                | -0.013056 | -0.132392 |
| 12               | 1                | 0              | 4.276802                | 2.502628  | 0.004712  |
| 13               | 7                | 0              | 2.345822                | 1.609718  | 0.044183  |
| 14               | 6                | 0              | 1.511712                | 2.786182  | 0.040960  |
| 15               | 1                | 0              | 1.974591                | 3.570080  | 0.639702  |
| 16               | 1                | 0              | 1.349113                | 3.157647  | -0.973582 |
| 17               | 1                | 0              | 0.548052                | 2.525652  | 0.477492  |
| 18               | 6                | 0              | -2.369144               | -0.168874 | 0.068767  |
| 19               | 6                | 0              | -2.310592               | -0.820465 | 1.265350  |
| 20               | 6                | 0              | -1.914153               | -2.149350 | 0.976684  |
| 21               | 6                | 0              | -1.754603               | -2.209524 | -0.377419 |
| 22               | 8                | 0              | -2.099112               | -1.029775 | -0.936384 |
| 23               | 1                | 0              | -2.474900               | -0.382106 | 2.234959  |
| 24               | 1                | 0              | -1.725583               | -2.949904 | 1.672594  |
| 25               | 1                | 0              | -1.533918               | -3.015296 | -1.056509 |
| 26               | 6                | 0              | -2.725947               | 1.225607  | -0.321129 |
| 27               | 1                | 0              | -1.924260               | 1.584324  | -0.974800 |
| 28               | 6                | 0              | -4.039731               | 1.248535  | -1.109281 |
| 29               | 1                | 0              | -4.266384               | 2.263928  | -1.438990 |
| 30               | 1                | 0              | -3.981522               | 0.605374  | -1.987331 |
| 31               | 1                | 0              | -4.862654               | 0.899043  | -0.481712 |
| 32               | 6                | 0              | -2.800707               | 2.120815  | 0.910122  |
| 33               | 1                | 0              | -1.866179               | 2.096749  | 1.473333  |
| 34               | 1                | 0              | -3.005400               | 3.151252  | 0.617287  |
| 35               | 1                | 0              | -3.606418               | 1.795881  | 1.573082  |

TS for **23** → **26a** with tBu-Furan: E[M06-2X/6-311+G(2df,p)] = -788.99131 E<sub>h</sub>

| Center<br>Number | Atomic<br>Number | Atomic<br>Type | Coordinates (Angstroms) |           |           |
|------------------|------------------|----------------|-------------------------|-----------|-----------|
|                  |                  |                | X                       | Y         | Z         |
| 1                | 6                | 0              | 2.634435                | -1.354696 | 0.133351  |
| 2                | 6                | 0              | 2.236538                | 0.002462  | -0.033385 |
| 3                | 6                | 0              | 0.885842                | 0.298997  | 0.076764  |
| 4                | 6                | 0              | 0.085883                | -0.644472 | 0.303797  |
| 5                | 6                | 0              | 0.316082                | -2.004683 | 0.488770  |
| 6                | 6                | 0              | 1.663525                | -2.339232 | 0.394229  |
| 7                | 6                | 0              | 4.058506                | -1.369336 | -0.022098 |
| 8                | 6                | 0              | 4.446294                | -0.084754 | -0.266855 |
| 9                | 1                | 0              | -0.436862               | -2.757524 | 0.678303  |
| 10               | 1                | 0              | 1.962554                | -3.373182 | 0.522917  |
| 11               | 1                | 0              | 4.715204                | -2.221227 | 0.043224  |
| 12               | 1                | 0              | 5.431997                | 0.318236  | -0.439844 |
| 13               | 7                | 0              | 3.355626                | 0.752784  | -0.270215 |
| 14               | 6                | 0              | 3.349454                | 2.169592  | -0.536728 |
| 15               | 1                | 0              | 2.937809                | 2.381706  | -1.526190 |
| 16               | 1                | 0              | 2.743876                | 2.681858  | 0.212229  |
| 17               | 1                | 0              | 4.369060                | 2.547434  | -0.486901 |
| 18               | 6                | 0              | -0.797095               | 2.233235  | 0.006187  |
| 19               | 6                | 0              | -1.039296               | 2.094086  | 1.348620  |
| 20               | 6                | 0              | -1.868365               | 0.972502  | 1.471443  |
| 21               | 6                | 0              | -2.098467               | 0.502022  | 0.190886  |
| 22               | 8                | 0              | -1.547434               | 1.363398  | -0.694425 |
| 23               | 1                | 0              | -0.264464               | 2.973442  | -0.565745 |
| 24               | 1                | 0              | -0.591359               | 2.675366  | 2.136821  |
| 25               | 1                | 0              | -2.214179               | 0.508271  | 2.380086  |
| 26               | 6                | 0              | -3.106457               | -0.472742 | -0.350546 |
| 27               | 6                | 0              | -4.370161               | 0.319237  | -0.728937 |
| 28               | 1                | 0              | -4.772012               | 0.847759  | 0.137557  |
| 29               | 1                | 0              | -4.148458               | 1.051175  | -1.507186 |
| 30               | 1                | 0              | -5.135908               | -0.362602 | -1.105701 |
| 31               | 6                | 0              | -3.451103               | -1.491189 | 0.735616  |
| 32               | 1                | 0              | -4.147466               | -2.231235 | 0.336991  |
| 33               | 1                | 0              | -2.557797               | -2.010690 | 1.085728  |
| 34               | 1                | 0              | -3.927573               | -1.011123 | 1.592894  |
| 35               | 6                | 0              | -2.570130               | -1.183003 | -1.596953 |
| 36               | 1                | 0              | -1.710444               | -1.808880 | -1.358023 |
| 37               | 1                | 0              | -3.354644               | -1.813120 | -2.021528 |
| 38               | 1                | 0              | -2.262149               | -0.460480 | -2.353697 |

TS for 27,0 → 30,0 with Furan: E[M06-2X/6-311+G(2df,p)] = -612.31417 E<sub>h</sub>

| Center<br>Number | Atomic<br>Number | Atomic<br>Type | Coordinates (Angstroms) |           |           |
|------------------|------------------|----------------|-------------------------|-----------|-----------|
|                  |                  |                | X                       | Y         | Z         |
| 1                | 6                | 0              | 1.360903                | -0.632902 | -0.038350 |
| 2                | 6                | 0              | 2.126975                | 0.547809  | 0.026196  |
| 3                | 6                | 0              | -0.436853               | 0.774064  | -0.085835 |
| 4                | 6                | 0              | -0.015280               | -0.408874 | -0.086575 |
| 5                | 6                | 0              | 2.313871                | -1.710871 | -0.020340 |
| 6                | 6                | 0              | 3.524572                | -1.123472 | 0.051083  |
| 7                | 1                | 0              | 2.119455                | -2.769175 | -0.056920 |
| 8                | 1                | 0              | 4.522367                | -1.527625 | 0.086970  |
| 9                | 6                | 0              | -2.758449               | 0.765910  | -0.394699 |
| 10               | 6                | 0              | -2.974557               | 0.431246  | 0.921279  |
| 11               | 6                | 0              | -2.881855               | -0.969542 | 0.986903  |
| 12               | 6                | 0              | -2.643207               | -1.388250 | -0.292807 |
| 13               | 8                | 0              | -2.681367               | -0.353660 | -1.144914 |
| 14               | 1                | 0              | -2.849047               | 1.695031  | -0.931585 |
| 15               | 1                | 0              | -3.108838               | 1.124946  | 1.734419  |
| 16               | 1                | 0              | -2.925086               | -1.595139 | 1.861860  |
| 17               | 6                | 0              | 0.217939                | 1.993171  | -0.023171 |
| 18               | 1                | 0              | -0.249428               | 2.968850  | -0.024763 |
| 19               | 6                | 0              | 1.602482                | 1.841178  | 0.035523  |
| 20               | 1                | 0              | 2.260471                | 2.698723  | 0.085586  |
| 21               | 8                | 0              | 3.448292                | 0.235113  | 0.082442  |
| 22               | 1                | 0              | -2.524552               | -2.364033 | -0.731039 |

TS for 27,0 → 30a,0 with tBu-Furan: E[M06-2X/6-311+G(2df,p)] = -769.54842 E<sub>h</sub>

| Center<br>Number | Atomic<br>Number | Atomic<br>Type | Coordinates (Angstroms) |           |           |
|------------------|------------------|----------------|-------------------------|-----------|-----------|
|                  |                  |                | X                       | Y         | Z         |
| 1                | 6                | 0              | 1.936181                | -0.623430 | 0.163535  |
| 2                | 6                | 0              | 3.119476                | 0.097034  | -0.095417 |
| 3                | 6                | 0              | 0.901720                | 1.398733  | -0.098750 |
| 4                | 6                | 0              | 0.797446                | 0.180385  | 0.144428  |
| 5                | 6                | 0              | 2.347675                | -1.985893 | 0.367861  |
| 6                | 6                | 0              | 3.688162                | -1.982516 | 0.223783  |
| 7                | 1                | 0              | 1.732417                | -2.841207 | 0.590814  |
| 8                | 1                | 0              | 4.422612                | -2.767716 | 0.288756  |
| 9                | 6                | 0              | -1.473597               | 2.318028  | -0.315409 |
| 10               | 6                | 0              | -1.595567               | 2.284068  | 1.042212  |
| 11               | 6                | 0              | -2.004627               | 0.969094  | 1.364123  |
| 12               | 6                | 0              | -2.118705               | 0.295646  | 0.179969  |
| 13               | 8                | 0              | -1.859599               | 1.136729  | -0.844685 |
| 14               | 1                | 0              | -1.247320               | 3.104328  | -1.015064 |
| 15               | 1                | 0              | -1.367575               | 3.090211  | 1.719419  |
| 16               | 1                | 0              | -2.153053               | 0.552860  | 2.345968  |
| 17               | 6                | 0              | 1.997580                | 2.203476  | -0.363125 |
| 18               | 1                | 0              | 1.983636                | 3.266075  | -0.561976 |
| 19               | 6                | 0              | 3.183297                | 1.468411  | -0.354309 |
| 20               | 1                | 0              | 4.136883                | 1.943025  | -0.545390 |
| 21               | 8                | 0              | 4.184187                | -0.746634 | -0.053713 |
| 22               | 6                | 0              | -2.596297               | -1.081145 | -0.172722 |
| 23               | 6                | 0              | -1.719379               | -1.689956 | -1.272325 |
| 24               | 1                | 0              | -2.119310               | -2.665051 | -1.559378 |
| 25               | 1                | 0              | -1.698572               | -1.051213 | -2.155862 |
| 26               | 1                | 0              | -0.693609               | -1.818434 | -0.924409 |
| 27               | 6                | 0              | -2.546865               | -1.960427 | 1.076093  |
| 28               | 1                | 0              | -3.205608               | -1.578453 | 1.858801  |
| 29               | 1                | 0              | -2.873579               | -2.971822 | 0.826930  |
| 30               | 1                | 0              | -1.530173               | -2.011077 | 1.472168  |
| 31               | 6                | 0              | -4.044864               | -0.976504 | -0.679059 |
| 32               | 1                | 0              | -4.421492               | -1.968575 | -0.938173 |
| 33               | 1                | 0              | -4.693688               | -0.548097 | 0.087083  |
| 34               | 1                | 0              | -4.098085               | -0.345631 | -1.567835 |

TS for **27,0** → **30b,0** with tBu-Furan: E[M06-2X/6-311+G(2df,p)] = -769.54719 E<sub>h</sub>

---

| Center<br>Number | Atomic<br>Number | Atomic<br>Type | Coordinates (Angstroms) |           |           |
|------------------|------------------|----------------|-------------------------|-----------|-----------|
|                  |                  |                | X                       | Y         | Z         |
| 1                | 6                | 0              | -2.430843               | 0.457699  | -0.160583 |
| 2                | 6                | 0              | -2.966383               | -0.822384 | 0.088738  |
| 3                | 6                | 0              | -0.375083               | -0.541795 | 0.263730  |
| 4                | 6                | 0              | -1.049165               | 0.469432  | -0.032076 |
| 5                | 6                | 0              | -3.557007               | 1.298698  | -0.462434 |
| 6                | 6                | 0              | -4.638141               | 0.498290  | -0.373244 |
| 7                | 1                | 0              | -3.559006               | 2.346761  | -0.708711 |
| 8                | 1                | 0              | -5.688989               | 0.688501  | -0.513575 |
| 9                | 6                | 0              | 2.021720                | 0.514858  | 0.156023  |
| 10               | 6                | 0              | 1.760408                | 1.103656  | 1.372927  |
| 11               | 6                | 0              | 0.966257                | 2.233006  | 1.112939  |
| 12               | 6                | 0              | 0.776992                | 2.254365  | -0.242264 |
| 13               | 8                | 0              | 1.509612                | 1.285301  | -0.827360 |
| 14               | 1                | 0              | 2.062986                | 0.722938  | 2.334004  |
| 15               | 1                | 0              | 0.517904                | 2.905244  | 1.825041  |
| 16               | 6                | 0              | -0.831329               | -1.833245 | 0.510816  |
| 17               | 1                | 0              | -0.212400               | -2.687833 | 0.752977  |
| 18               | 6                | 0              | -2.217076               | -1.953751 | 0.415800  |
| 19               | 1                | 0              | -2.711382               | -2.900672 | 0.590167  |
| 20               | 8                | 0              | -4.319142               | -0.781550 | -0.043174 |
| 21               | 6                | 0              | 2.951360                | -0.590751 | -0.252942 |
| 22               | 6                | 0              | 3.128119                | -1.552557 | 0.921819  |
| 23               | 1                | 0              | 3.781486                | -2.376213 | 0.627926  |
| 24               | 1                | 0              | 3.583757                | -1.054230 | 1.779886  |
| 25               | 1                | 0              | 2.166629                | -1.965290 | 1.233773  |
| 26               | 6                | 0              | 2.401056                | -1.342019 | -1.468692 |
| 27               | 1                | 0              | 1.455607                | -1.831732 | -1.233112 |
| 28               | 1                | 0              | 2.230534                | -0.662707 | -2.304435 |
| 29               | 1                | 0              | 3.120425                | -2.101324 | -1.782731 |
| 30               | 6                | 0              | 4.308500                | 0.035229  | -0.617694 |
| 31               | 1                | 0              | 4.728734                | 0.574775  | 0.232991  |
| 32               | 1                | 0              | 5.011220                | -0.746519 | -0.914935 |
| 33               | 1                | 0              | 4.199944                | 0.733788  | -1.449071 |
| 34               | 1                | 0              | 0.292484                | 2.952124  | -0.903100 |

---



TS for **28,0** → **31,0** with Furan: E[M06-2X/6-311+G(2df,p)] = -612.31265 E<sub>h</sub>

| Center<br>Number | Atomic<br>Number | Atomic<br>Type | Coordinates (Angstroms) |           |           |
|------------------|------------------|----------------|-------------------------|-----------|-----------|
|                  |                  |                | X                       | Y         | Z         |
| 1                | 6                | 0              | -1.875239               | 0.737326  | -0.016460 |
| 2                | 6                | 0              | -1.926388               | -0.675253 | -0.002292 |
| 3                | 6                | 0              | -0.814638               | -1.522077 | -0.047749 |
| 4                | 6                | 0              | 0.342011                | -0.774647 | -0.102667 |
| 5                | 6                | 0              | 0.380370                | 0.485583  | -0.120232 |
| 6                | 6                | 0              | -0.636073               | 1.403956  | -0.081005 |
| 7                | 6                | 0              | -3.252900               | 1.161054  | 0.048084  |
| 8                | 6                | 0              | -3.988236               | 0.035393  | 0.095364  |
| 9                | 1                | 0              | -0.910245               | -2.600034 | -0.035836 |
| 10               | 1                | 0              | -0.547420               | 2.482614  | -0.099947 |
| 11               | 1                | 0              | -3.633766               | 2.168515  | 0.057681  |
| 12               | 1                | 0              | -5.051213               | -0.131639 | 0.149660  |
| 13               | 6                | 0              | 3.043736                | -1.044536 | -0.280108 |
| 14               | 6                | 0              | 3.174332                | -0.590426 | 1.004507  |
| 15               | 6                | 0              | 2.972650                | 0.798837  | 0.944165  |
| 16               | 6                | 0              | 2.715658                | 1.087850  | -0.373565 |
| 17               | 8                | 0              | 2.883119                | -0.016661 | -1.128463 |
| 18               | 1                | 0              | 3.152873                | -2.018745 | -0.724275 |
| 19               | 1                | 0              | 3.337162                | -1.198262 | 1.878094  |
| 20               | 1                | 0              | 2.946709                | 1.500244  | 1.761153  |
| 21               | 1                | 0              | 2.598871                | 2.016856  | -0.905155 |
| 22               | 8                | 0              | -3.221202               | -1.088077 | 0.067259  |

TS for 28,0 → 31a,0 with tBu-Furan: E[M06-2X/6-311+G(2df,p)] = -769.54622 E<sub>h</sub>

| Center<br>Number | Atomic<br>Number | Atomic<br>Type | Coordinates (Angstroms) |           |           |
|------------------|------------------|----------------|-------------------------|-----------|-----------|
|                  |                  |                | X                       | Y         | Z         |
| 1                | 6                | 0              | 2.633839                | -0.859798 | 0.195896  |
| 2                | 6                | 0              | 3.004694                | 0.449660  | -0.187312 |
| 3                | 6                | 0              | 2.113295                | 1.503805  | -0.414594 |
| 4                | 6                | 0              | 0.836804                | 1.047736  | -0.194159 |
| 5                | 6                | 0              | 0.471170                | -0.104605 | 0.149845  |
| 6                | 6                | 0              | 1.278154                | -1.194775 | 0.379640  |
| 7                | 6                | 0              | 3.879901                | -1.579289 | 0.308518  |
| 8                | 6                | 0              | 4.850147                | -0.699881 | 0.001314  |
| 9                | 1                | 0              | 2.437076                | 2.490572  | -0.717287 |
| 10               | 1                | 0              | 0.960262                | -2.191115 | 0.662566  |
| 11               | 1                | 0              | 4.022647                | -2.611488 | 0.581236  |
| 12               | 1                | 0              | 5.922375                | -0.793026 | -0.047095 |
| 13               | 6                | 0              | -1.398505               | 2.310858  | -0.368790 |
| 14               | 6                | 0              | -1.505126               | 2.307211  | 0.993539  |
| 15               | 6                | 0              | -2.007181               | 1.037724  | 1.338721  |
| 16               | 6                | 0              | -2.191393               | 0.353931  | 0.161948  |
| 17               | 8                | 0              | -1.907108               | 1.168647  | -0.876134 |
| 18               | 1                | 0              | -1.192030               | 3.097322  | 1.655220  |
| 19               | 1                | 0              | -2.167484               | 0.644478  | 2.328451  |
| 20               | 6                | 0              | -2.832998               | -0.965252 | -0.154708 |
| 21               | 6                | 0              | -2.691670               | -1.889490 | 1.054784  |
| 22               | 1                | 0              | -3.202589               | -1.482538 | 1.929744  |
| 23               | 1                | 0              | -3.136252               | -2.860846 | 0.829895  |
| 24               | 1                | 0              | -1.639540               | -2.037237 | 1.307307  |
| 25               | 6                | 0              | -4.322885               | -0.718769 | -0.447830 |
| 26               | 1                | 0              | -4.442360               | -0.048866 | -1.301088 |
| 27               | 1                | 0              | -4.818255               | -1.664057 | -0.681053 |
| 28               | 1                | 0              | -4.819183               | -0.269899 | 0.414448  |
| 29               | 6                | 0              | -2.177225               | -1.606017 | -1.381373 |
| 30               | 1                | 0              | -1.123705               | -1.818606 | -1.195702 |
| 31               | 1                | 0              | -2.687835               | -2.541641 | -1.619225 |
| 32               | 1                | 0              | -2.241552               | -0.948746 | -2.248993 |
| 33               | 1                | 0              | -1.118932               | 3.067675  | -1.081235 |
| 34               | 8                | 0              | 4.357262                | 0.532569  | -0.302593 |

TS for **28,0** → **31b,0** with tBu-Furan: E[M06-2X/6-311+G(2df,p)] = -769.54662 E<sub>h</sub>

| Center<br>Number | Atomic<br>Number | Atomic<br>Type | Coordinates (Angstroms) |           |           |
|------------------|------------------|----------------|-------------------------|-----------|-----------|
|                  |                  |                | X                       | Y         | Z         |
| 1                | 6                | 0              | -3.101517               | 0.528688  | -0.177760 |
| 2                | 6                | 0              | -2.767908               | -0.806891 | 0.148219  |
| 3                | 6                | 0              | -1.469996               | -1.288916 | 0.345076  |
| 4                | 6                | 0              | -0.559989               | -0.264397 | 0.184363  |
| 5                | 6                | 0              | -0.873580               | 0.914773  | -0.112743 |
| 6                | 6                | 0              | -2.091990               | 1.499844  | -0.330490 |
| 7                | 6                | 0              | -4.540797               | 0.539973  | -0.276806 |
| 8                | 6                | 0              | -4.943173               | -0.717035 | -0.015968 |
| 9                | 1                | 0              | -1.269677               | -2.324430 | 0.590121  |
| 10               | 1                | 0              | -2.294299               | 2.531507  | -0.586708 |
| 11               | 1                | 0              | -5.179466               | 1.375333  | -0.509880 |
| 12               | 1                | 0              | -5.920160               | -1.169615 | 0.022111  |
| 13               | 6                | 0              | 2.278253                | 0.384444  | 0.155905  |
| 14               | 6                | 0              | 2.053443                | 1.093249  | 1.304222  |
| 15               | 6                | 0              | 1.403332                | 2.287444  | 0.919944  |
| 16               | 6                | 0              | 1.258579                | 2.217514  | -0.435363 |
| 17               | 8                | 0              | 1.857955                | 1.103028  | -0.907450 |
| 18               | 1                | 0              | 2.288502                | 0.769239  | 2.303761  |
| 19               | 1                | 0              | 1.034295                | 3.074292  | 1.556467  |
| 20               | 1                | 0              | 0.885020                | 2.908152  | -1.171890 |
| 21               | 6                | 0              | 3.010261                | -0.892296 | -0.130397 |
| 22               | 6                | 0              | 4.400775                | -0.538234 | -0.684327 |
| 23               | 1                | 0              | 4.960677                | -1.451986 | -0.895660 |
| 24               | 1                | 0              | 4.313433                | 0.033329  | -1.609740 |
| 25               | 1                | 0              | 4.965763                | 0.056103  | 0.036132  |
| 26               | 6                | 0              | 3.156932                | -1.684283 | 1.168110  |
| 27               | 1                | 0              | 2.177754                | -1.908294 | 1.596887  |
| 28               | 1                | 0              | 3.671219                | -2.626152 | 0.968098  |
| 29               | 1                | 0              | 3.742051                | -1.132778 | 1.907011  |
| 30               | 6                | 0              | 2.250725                | -1.727394 | -1.166666 |
| 31               | 1                | 0              | 2.829804                | -2.620775 | -1.410758 |
| 32               | 1                | 0              | 1.277840                | -2.033209 | -0.780173 |
| 33               | 1                | 0              | 2.087122                | -1.160034 | -2.083435 |
| 34               | 8                | 0              | -3.901704               | -1.552975 | 0.244417  |

TS for 29,0 → 32,0 with Furan: E[M06-2X/6-311+G(2df,p)] = -612.31764 E<sub>h</sub>

| Center<br>Number | Atomic<br>Number | Atomic<br>Type | Coordinates (Angstroms) |           |           |
|------------------|------------------|----------------|-------------------------|-----------|-----------|
|                  |                  |                | X                       | Y         | Z         |
| 1                | 6                | 0              | -2.238455               | 0.617631  | 0.027498  |
| 2                | 6                | 0              | -1.441087               | -0.545114 | -0.026084 |
| 3                | 6                | 0              | -0.066430               | -0.428781 | -0.067828 |
| 4                | 6                | 0              | 0.341044                | 0.755447  | -0.065298 |
| 5                | 6                | 0              | -0.245113               | 2.002035  | -0.015689 |
| 6                | 6                | 0              | -1.635787               | 1.886116  | 0.031962  |
| 7                | 6                | 0              | -3.595826               | 0.135082  | 0.070410  |
| 8                | 6                | 0              | -3.511182               | -1.208939 | 0.039354  |
| 9                | 1                | 0              | 0.260911                | 2.956405  | -0.015579 |
| 10               | 1                | 0              | -2.242553               | 2.782562  | 0.072645  |
| 11               | 1                | 0              | -4.505449               | 0.710319  | 0.117283  |
| 12               | 1                | 0              | -4.264075               | -1.978980 | 0.051443  |
| 13               | 6                | 0              | 2.759659                | -1.407275 | -0.195635 |
| 14               | 6                | 0              | 2.961368                | -0.871029 | 1.036460  |
| 15               | 6                | 0              | 3.010382                | 0.532010  | 0.844070  |
| 16               | 6                | 0              | 2.829943                | 0.735942  | -0.493793 |
| 17               | 8                | 0              | 2.735395                | -0.444808 | -1.135825 |
| 18               | 1                | 0              | 2.653127                | -2.418374 | -0.548267 |
| 19               | 1                | 0              | 3.024230                | -1.412118 | 1.964803  |
| 20               | 1                | 0              | 3.131386                | 1.297958  | 1.591807  |
| 21               | 8                | 0              | -2.225808               | -1.651790 | -0.018365 |
| 22               | 1                | 0              | 2.854621                | 1.616251  | -1.113185 |

TS for 29,0 → 32a,0 with tBu-Furan: E[M06-2X/6-311+G(2df,p)] = -769.54982 E<sub>h</sub>

| Center<br>Number | Atomic<br>Number | Atomic<br>Type | Coordinates (Angstroms) |           |           |
|------------------|------------------|----------------|-------------------------|-----------|-----------|
|                  |                  |                | X                       | Y         | Z         |
| 1                | 6                | 0              | 2.963137                | -0.904628 | 0.130339  |
| 2                | 6                | 0              | 2.428606                | 0.366825  | -0.160734 |
| 3                | 6                | 0              | 1.072060                | 0.563069  | -0.043859 |
| 4                | 6                | 0              | 0.387327                | -0.432523 | 0.306477  |
| 5                | 6                | 0              | 0.738194                | -1.734231 | 0.623041  |
| 6                | 6                | 0              | 2.112870                | -1.950154 | 0.521257  |
| 7                | 6                | 0              | 4.383188                | -0.765027 | -0.077020 |
| 8                | 6                | 0              | 4.578217                | 0.511493  | -0.459709 |
| 9                | 1                | 0              | 0.062991                | -2.526944 | 0.913689  |
| 10               | 1                | 0              | 2.516670                | -2.929961 | 0.746575  |
| 11               | 1                | 0              | 5.149204                | -1.513291 | 0.041181  |
| 12               | 1                | 0              | 5.468721                | 1.057728  | -0.721574 |
| 13               | 6                | 0              | -0.866480               | 2.332920  | -0.168447 |
| 14               | 6                | 0              | -1.036183               | 2.237690  | 1.184237  |
| 15               | 6                | 0              | -1.732342               | 1.036146  | 1.398714  |
| 16               | 6                | 0              | -1.960505               | 0.479758  | 0.156859  |
| 17               | 8                | 0              | -1.517852               | 1.333300  | -0.793049 |
| 18               | 1                | 0              | -0.419060               | 3.080622  | -0.799899 |
| 19               | 1                | 0              | -0.631524               | 2.909399  | 1.922078  |
| 20               | 1                | 0              | -2.001027               | 0.592337  | 2.343008  |
| 21               | 6                | 0              | -2.857942               | -0.635104 | -0.300424 |
| 22               | 6                | 0              | -4.197386               | -0.012790 | -0.731879 |
| 23               | 1                | 0              | -4.654065               | 0.537311  | 0.092997  |
| 24               | 1                | 0              | -4.052424               | 0.674587  | -1.566621 |
| 25               | 1                | 0              | -4.886293               | -0.799056 | -1.048557 |
| 26               | 6                | 0              | -3.095993               | -1.597015 | 0.862841  |
| 27               | 1                | 0              | -3.713227               | -2.432573 | 0.527759  |
| 28               | 1                | 0              | -2.154401               | -1.995821 | 1.244046  |
| 29               | 1                | 0              | -3.617735               | -1.103475 | 1.685338  |
| 30               | 8                | 0              | 3.419015                | 1.223001  | -0.520184 |
| 31               | 6                | 0              | -2.246460               | -1.379625 | -1.491496 |
| 32               | 1                | 0              | -1.331789               | -1.900275 | -1.207663 |
| 33               | 1                | 0              | -2.962304               | -2.113467 | -1.867938 |
| 34               | 1                | 0              | -2.004903               | -0.688353 | -2.299726 |

TS for **27,S** → **30,S** with Furan: E[M06-2X/6-311+G(2df,p)] = -935.29632 E<sub>h</sub>

| Center<br>Number | Atomic<br>Number | Atomic<br>Type | Coordinates (Angstroms) |           |           |
|------------------|------------------|----------------|-------------------------|-----------|-----------|
|                  |                  |                | X                       | Y         | Z         |
| 1                | 6                | 0              | 1.039485                | -0.578742 | -0.054563 |
| 2                | 6                | 0              | 1.824422                | 0.605320  | 0.012256  |
| 3                | 6                | 0              | -0.775282               | 0.848361  | -0.098329 |
| 4                | 6                | 0              | -0.332767               | -0.324783 | -0.101084 |
| 5                | 6                | 0              | 1.846932                | -1.762075 | -0.050636 |
| 6                | 6                | 0              | 3.166593                | -1.482680 | 0.016933  |
| 7                | 1                | 0              | 1.442223                | -2.762600 | -0.096706 |
| 8                | 1                | 0              | 3.985637                | -2.184639 | 0.034483  |
| 9                | 6                | 0              | -3.107322               | 0.747926  | -0.364884 |
| 10               | 6                | 0              | -3.295947               | 0.376517  | 0.946699  |
| 11               | 6                | 0              | -3.113642               | -1.014314 | 0.986306  |
| 12               | 6                | 0              | -2.853639               | -1.394944 | -0.303411 |
| 13               | 8                | 0              | -2.974049               | -0.351356 | -1.136683 |
| 14               | 1                | 0              | -3.260619               | 1.679340  | -0.883205 |
| 15               | 1                | 0              | -3.466502               | 1.045899  | 1.773259  |
| 16               | 1                | 0              | -3.110493               | -1.657175 | 1.849843  |
| 17               | 6                | 0              | -0.110100               | 2.062328  | -0.035674 |
| 18               | 1                | 0              | -0.565136               | 3.043904  | -0.035478 |
| 19               | 6                | 0              | 1.270280                | 1.895343  | 0.021384  |
| 20               | 1                | 0              | 1.916781                | 2.763147  | 0.071795  |
| 21               | 1                | 0              | -2.686302               | -2.354981 | -0.760191 |
| 22               | 16               | 0              | 3.511421                | 0.210525  | 0.080605  |

TS for 27,S → 30a,S with tBu-Furan: E[M06-2X/6-311+G(2df,p)] = -1092.53091 E<sub>h</sub>

| Center<br>Number | Atomic<br>Number | Atomic<br>Type | Coordinates (Angstroms) |           |           |
|------------------|------------------|----------------|-------------------------|-----------|-----------|
|                  |                  |                | X                       | Y         | Z         |
| 1                | 6                | 0              | 1.668246                | -0.415323 | 0.150680  |
| 2                | 6                | 0              | 2.824945                | 0.373782  | -0.099494 |
| 3                | 6                | 0              | 0.501881                | 1.558500  | -0.112138 |
| 4                | 6                | 0              | 0.490204                | 0.333659  | 0.125452  |
| 5                | 6                | 0              | 1.989463                | -1.792997 | 0.373472  |
| 6                | 6                | 0              | 3.317827                | -2.027413 | 0.296219  |
| 7                | 1                | 0              | 1.252548                | -2.555734 | 0.581358  |
| 8                | 1                | 0              | 3.825788                | -2.970655 | 0.423305  |
| 9                | 6                | 0              | -1.872892               | 2.293460  | -0.277151 |
| 10               | 6                | 0              | -1.995772               | 2.226132  | 1.082257  |
| 11               | 6                | 0              | -2.297117               | 0.880709  | 1.379384  |
| 12               | 6                | 0              | -2.359548               | 0.220375  | 0.180703  |
| 13               | 8                | 0              | -2.183820               | 1.099420  | -0.827618 |
| 14               | 1                | 0              | -1.724098               | 3.111204  | -0.961392 |
| 15               | 1                | 0              | -1.824251               | 3.034148  | 1.773779  |
| 16               | 1                | 0              | -2.404397               | 0.434351  | 2.353357  |
| 17               | 6                | 0              | 1.553767                | 2.422866  | -0.367351 |
| 18               | 1                | 0              | 1.485220                | 3.483895  | -0.565001 |
| 19               | 6                | 0              | 2.775411                | 1.754904  | -0.352206 |
| 20               | 1                | 0              | 3.690455                | 2.304142  | -0.538745 |
| 21               | 6                | 0              | -2.735956               | -1.182272 | -0.192554 |
| 22               | 6                | 0              | -1.859207               | -1.687489 | -1.343041 |
| 23               | 1                | 0              | -2.185252               | -2.687530 | -1.637306 |
| 24               | 1                | 0              | -1.933547               | -1.031030 | -2.210522 |
| 25               | 1                | 0              | -0.811380               | -1.732499 | -1.043091 |
| 26               | 6                | 0              | -2.562531               | -2.085189 | 1.028208  |
| 27               | 1                | 0              | -3.221652               | -1.782899 | 1.844673  |
| 28               | 1                | 0              | -2.809296               | -3.114832 | 0.762365  |
| 29               | 1                | 0              | -1.531150               | -2.054808 | 1.386509  |
| 30               | 6                | 0              | -4.208481               | -1.185441 | -0.637449 |
| 31               | 1                | 0              | -4.512344               | -2.198334 | -0.911059 |
| 32               | 1                | 0              | -4.857700               | -0.833393 | 0.166301  |
| 33               | 1                | 0              | -4.350922               | -0.537940 | -1.504217 |
| 34               | 16               | 0              | 4.250069                | -0.612064 | -0.044332 |

TS for **27,s** → **30b,s** with tBu-Furan: E[M06-2X/6-311+G(2df,p)] = -1092.52984 E<sub>h</sub>

| Center<br>Number | Atomic<br>Number | Atomic<br>Type | Coordinates (Angstroms) |           |           |
|------------------|------------------|----------------|-------------------------|-----------|-----------|
|                  |                  |                | X                       | Y         | Z         |
| 1                | 6                | 0              | -2.122828               | 0.495457  | -0.116455 |
| 2                | 6                | 0              | -2.718746               | -0.778292 | 0.099974  |
| 3                | 6                | 0              | -0.079813               | -0.599036 | 0.272143  |
| 4                | 6                | 0              | -0.741895               | 0.426761  | 0.008191  |
| 5                | 6                | 0              | -3.090374               | 1.509996  | -0.403654 |
| 6                | 6                | 0              | -4.351739               | 1.025738  | -0.399816 |
| 7                | 1                | 0              | -2.840527               | 2.542815  | -0.598766 |
| 8                | 1                | 0              | -5.263333               | 1.572810  | -0.582999 |
| 9                | 6                | 0              | 2.333548                | 0.506218  | 0.159695  |
| 10               | 6                | 0              | 2.072841                | 1.086923  | 1.379818  |
| 11               | 6                | 0              | 1.243190                | 2.192984  | 1.130789  |
| 12               | 6                | 0              | 1.032770                | 2.207993  | -0.222127 |
| 13               | 8                | 0              | 1.786597                | 1.260080  | -0.816765 |
| 14               | 1                | 0              | 2.398049                | 0.714916  | 2.336807  |
| 15               | 1                | 0              | 0.787013                | 2.853492  | 1.849036  |
| 16               | 6                | 0              | -0.590140               | -1.877885 | 0.482311  |
| 17               | 1                | 0              | -0.008319               | -2.765242 | 0.698386  |
| 18               | 6                | 0              | -1.977696               | -1.935369 | 0.390335  |
| 19               | 1                | 0              | -2.489740               | -2.877885 | 0.544320  |
| 20               | 6                | 0              | 3.271567                | -0.587771 | -0.259973 |
| 21               | 6                | 0              | 3.458095                | -1.557526 | 0.906872  |
| 22               | 1                | 0              | 4.121607                | -2.370832 | 0.606872  |
| 23               | 1                | 0              | 3.906533                | -1.061653 | 1.770124  |
| 24               | 1                | 0              | 2.500165                | -1.983416 | 1.212470  |
| 25               | 6                | 0              | 2.721981                | -1.334949 | -1.478472 |
| 26               | 1                | 0              | 1.776698                | -1.825501 | -1.243265 |
| 27               | 1                | 0              | 2.550891                | -0.653564 | -2.312339 |
| 28               | 1                | 0              | 3.441701                | -2.093030 | -1.794597 |
| 29               | 6                | 0              | 4.622687                | 0.051051  | -0.624629 |
| 30               | 1                | 0              | 5.043151                | 0.585055  | 0.229410  |
| 31               | 1                | 0              | 5.329414                | -0.722801 | -0.932794 |
| 32               | 1                | 0              | 4.505566                | 0.757061  | -1.448574 |
| 33               | 1                | 0              | 0.527711                | 2.897186  | -0.876829 |
| 34               | 16               | 0              | -4.442503               | -0.665238 | -0.054573 |



TS for **28,S** → **31,S** with Furan: E[M06-2X/6-311+G(2df,p)] = -935.29296 E<sub>h</sub>

| Center<br>Number | Atomic<br>Number | Atomic<br>Type | Coordinates (Angstroms) |           |           |
|------------------|------------------|----------------|-------------------------|-----------|-----------|
|                  |                  |                | X                       | Y         | Z         |
| 1                | 6                | 0              | -1.549119               | 0.861810  | -0.024537 |
| 2                | 6                | 0              | -1.659695               | -0.553731 | -0.021291 |
| 3                | 6                | 0              | -0.547182               | -1.416624 | -0.072933 |
| 4                | 6                | 0              | 0.630840                | -0.713125 | -0.118754 |
| 5                | 6                | 0              | 0.715427                | 0.545347  | -0.124521 |
| 6                | 6                | 0              | -0.277109               | 1.481150  | -0.081034 |
| 7                | 6                | 0              | -2.840305               | 1.492185  | 0.035970  |
| 8                | 6                | 0              | -3.856578               | 0.607688  | 0.083042  |
| 9                | 1                | 0              | -0.659987               | -2.493770 | -0.072624 |
| 10               | 1                | 0              | -0.167330               | 2.558618  | -0.090403 |
| 11               | 1                | 0              | -2.978969               | 2.564541  | 0.043002  |
| 12               | 1                | 0              | -4.912788               | 0.823022  | 0.132255  |
| 13               | 6                | 0              | 3.309914                | -1.108179 | -0.286853 |
| 14               | 6                | 0              | 3.456083                | -0.678958 | 1.004316  |
| 15               | 6                | 0              | 3.334046                | 0.720864  | 0.961471  |
| 16               | 6                | 0              | 3.106358                | 1.041168  | -0.353509 |
| 17               | 8                | 0              | 3.211430                | -0.061154 | -1.121948 |
| 18               | 1                | 0              | 3.368220                | -2.080715 | -0.744076 |
| 19               | 1                | 0              | 3.579457                | -1.306197 | 1.870665  |
| 20               | 1                | 0              | 3.343195                | 1.411768  | 1.787666  |
| 21               | 1                | 0              | 3.040452                | 1.981702  | -0.873235 |
| 22               | 16               | 0              | -3.327486               | -1.040457 | 0.057133  |

TS for **28,S** → **31a,S** with tBu-Furan: E[M06-2X/6-311+G(2df,p)] = -1092.52669 E<sub>h</sub>

| Center<br>Number | Atomic<br>Number | Atomic<br>Type | Coordinates (Angstroms) |           |           |
|------------------|------------------|----------------|-------------------------|-----------|-----------|
|                  |                  |                | X                       | Y         | Z         |
| 1                | 6                | 0              | 2.345406                | -0.886282 | 0.203481  |
| 2                | 6                | 0              | 2.741969                | 0.431988  | -0.146476 |
| 3                | 6                | 0              | 1.826974                | 1.483031  | -0.359327 |
| 4                | 6                | 0              | 0.549136                | 1.033819  | -0.169263 |
| 5                | 6                | 0              | 0.169143                | -0.123083 | 0.144076  |
| 6                | 6                | 0              | 0.975658                | -1.209617 | 0.357706  |
| 7                | 6                | 0              | 3.483098                | -1.752865 | 0.358966  |
| 8                | 6                | 0              | 4.657037                | -1.128141 | 0.139495  |
| 9                | 1                | 0              | 2.142512                | 2.480680  | -0.636486 |
| 10               | 1                | 0              | 0.661146                | -2.215020 | 0.613822  |
| 11               | 1                | 0              | 3.401852                | -2.798018 | 0.624127  |
| 12               | 1                | 0              | 5.647740                | -1.552660 | 0.191010  |
| 13               | 6                | 0              | -1.700774               | 2.326121  | -0.321939 |
| 14               | 6                | 0              | -1.801441               | 2.290462  | 1.039260  |
| 15               | 6                | 0              | -2.313909               | 1.016253  | 1.356486  |
| 16               | 6                | 0              | -2.507130               | 0.362557  | 0.165549  |
| 17               | 8                | 0              | -2.212779               | 1.196842  | -0.854472 |
| 18               | 1                | 0              | -1.483141               | 3.063407  | 1.718506  |
| 19               | 1                | 0              | -2.476890               | 0.602420  | 2.337328  |
| 20               | 6                | 0              | -3.153845               | -0.946449 | -0.181216 |
| 21               | 6                | 0              | -3.018617               | -1.897570 | 1.007975  |
| 22               | 1                | 0              | -3.528991               | -1.507428 | 1.890877  |
| 23               | 1                | 0              | -3.467339               | -2.861701 | 0.761330  |
| 24               | 1                | 0              | -1.967478               | -2.055563 | 1.258642  |
| 25               | 6                | 0              | -4.642073               | -0.687493 | -0.471878 |
| 26               | 1                | 0              | -4.757049               | 0.001619  | -1.310333 |
| 27               | 1                | 0              | -5.140772               | -1.625346 | -0.726982 |
| 28               | 1                | 0              | -5.138371               | -0.255778 | 0.399106  |
| 29               | 6                | 0              | -2.498187               | -1.563142 | -1.420339 |
| 30               | 1                | 0              | -1.445856               | -1.784327 | -1.237542 |
| 31               | 1                | 0              | -3.012021               | -2.491364 | -1.679250 |
| 32               | 1                | 0              | -2.558287               | -0.887089 | -2.273700 |
| 33               | 1                | 0              | -1.413460               | 3.095241  | -1.017913 |
| 34               | 16               | 0              | 4.472749                | 0.544915  | -0.268257 |

TS for **28,S** → **31b,S** with tBu-Furan: E[M06-2X/6-311+G(2df,p)] = -1092.52688 E<sub>h</sub>

---

| Center<br>Number | Atomic<br>Number | Atomic<br>Type | Coordinates (Angstroms) |           |           |
|------------------|------------------|----------------|-------------------------|-----------|-----------|
|                  |                  |                | X                       | Y         | Z         |
| 1                | 6                | 0              | -2.784663               | 0.775365  | -0.199273 |
| 2                | 6                | 0              | -2.511384               | -0.583646 | 0.111997  |
| 3                | 6                | 0              | -1.208864               | -1.089346 | 0.294140  |
| 4                | 6                | 0              | -0.265466               | -0.102139 | 0.143849  |
| 5                | 6                | 0              | -0.526577               | 1.094373  | -0.136987 |
| 6                | 6                | 0              | -1.727449               | 1.707268  | -0.342808 |
| 7                | 6                | 0              | -4.196962               | 1.012750  | -0.330970 |
| 8                | 6                | 0              | -4.938278               | -0.095005 | -0.129845 |
| 9                | 1                | 0              | -1.026745               | -2.132489 | 0.524257  |
| 10               | 1                | 0              | -1.908344               | 2.746153  | -0.588236 |
| 11               | 1                | 0              | -4.617926               | 1.980494  | -0.566322 |
| 12               | 1                | 0              | -6.013010               | -0.182404 | -0.171062 |
| 13               | 6                | 0              | 2.563000                | 0.328104  | 0.171778  |
| 14               | 6                | 0              | 2.375876                | 1.002610  | 1.348090  |
| 15               | 6                | 0              | 1.849542                | 2.268536  | 1.007936  |
| 16               | 6                | 0              | 1.734248                | 2.274571  | -0.351585 |
| 17               | 8                | 0              | 2.239178                | 1.131648  | -0.864008 |
| 18               | 1                | 0              | 2.554469                | 0.612894  | 2.335859  |
| 19               | 1                | 0              | 1.538400                | 3.056122  | 1.673725  |
| 20               | 1                | 0              | 1.439588                | 3.027821  | -1.061927 |
| 21               | 6                | 0              | 3.187140                | -0.995050 | -0.157860 |
| 22               | 6                | 0              | 4.643491                | -0.749021 | -0.587642 |
| 23               | 1                | 0              | 5.125563                | -1.698708 | -0.830321 |
| 24               | 1                | 0              | 4.682274                | -0.108601 | -1.470409 |
| 25               | 1                | 0              | 5.208360                | -0.267425 | 0.212586  |
| 26               | 6                | 0              | 3.158084                | -1.882512 | 1.086032  |
| 27               | 1                | 0              | 2.132251                | -2.031729 | 1.430026  |
| 28               | 1                | 0              | 3.591734                | -2.856819 | 0.852947  |
| 29               | 1                | 0              | 3.737252                | -1.444729 | 1.901674  |
| 30               | 6                | 0              | 2.431510                | -1.677690 | -1.302489 |
| 31               | 1                | 0              | 2.932758                | -2.612270 | -1.563542 |
| 32               | 1                | 0              | 1.403692                | -1.899420 | -1.012599 |
| 33               | 1                | 0              | 2.403357                | -1.042237 | -2.188150 |
| 34               | 16               | 0              | -3.987286               | -1.495928 | 0.230461  |

---

TS for **29,S** → **32,S** with Furan: E[M06-2X/6-311+G(2df,p)] = -935.29696 E<sub>h</sub>

| Center<br>Number | Atomic<br>Number | Atomic<br>Type | Coordinates (Angstroms) |           |           |
|------------------|------------------|----------------|-------------------------|-----------|-----------|
|                  |                  |                | X                       | Y         | Z         |
| 1                | 6                | 0              | -1.907459               | 0.922616  | 0.027695  |
| 2                | 6                | 0              | -1.202807               | -0.309811 | -0.036531 |
| 3                | 6                | 0              | 0.181997                | -0.239549 | -0.086969 |
| 4                | 6                | 0              | 0.710906                | 0.896733  | -0.090324 |
| 5                | 6                | 0              | 0.185873                | 2.175174  | -0.031321 |
| 6                | 6                | 0              | -1.203142               | 2.144180  | 0.028534  |
| 7                | 6                | 0              | -3.325855               | 0.706552  | 0.087834  |
| 8                | 6                | 0              | -3.657273               | -0.602580 | 0.067387  |
| 9                | 1                | 0              | 0.745073                | 3.100674  | -0.035995 |
| 10               | 1                | 0              | -1.755760               | 3.075486  | 0.076372  |
| 11               | 1                | 0              | -4.054403               | 1.503724  | 0.142122  |
| 12               | 1                | 0              | -4.649936               | -1.023932 | 0.098914  |
| 13               | 6                | 0              | 2.761154                | -1.473873 | -0.259410 |
| 14               | 6                | 0              | 3.021375                | -1.042470 | 1.008951  |
| 15               | 6                | 0              | 3.231313                | 0.346874  | 0.906882  |
| 16               | 6                | 0              | 3.062470                | 0.660469  | -0.418128 |
| 17               | 8                | 0              | 2.877349                | -0.465605 | -1.137387 |
| 18               | 1                | 0              | 2.556242                | -2.445878 | -0.673602 |
| 19               | 1                | 0              | 3.009562                | -1.645648 | 1.900432  |
| 20               | 1                | 0              | 3.422982                | 1.047507  | 1.702399  |
| 21               | 1                | 0              | 3.222410                | 1.565231  | -0.979643 |
| 22               | 16               | 0              | -2.291641               | -1.659889 | -0.022469 |

TS for 29,S → 32a,S with tBu-Furan: E[M06-2X/6-311+G(2df,p)] = -1092.52985 E<sub>h</sub>

| Center<br>Number | Atomic<br>Number | Atomic<br>Type | Coordinates (Angstroms) |           |           |
|------------------|------------------|----------------|-------------------------|-----------|-----------|
|                  |                  |                | X                       | Y         | Z         |
| 1                | 6                | 0              | -2.713112               | 1.122529  | 0.138021  |
| 2                | 6                | 0              | -2.211819               | -0.190710 | -0.073143 |
| 3                | 6                | 0              | -0.840678               | -0.313877 | 0.029404  |
| 4                | 6                | 0              | -0.101055               | 0.661389  | 0.281085  |
| 5                | 6                | 0              | -0.455297               | 1.987684  | 0.495883  |
| 6                | 6                | 0              | -1.829889               | 2.185677  | 0.417100  |
| 7                | 6                | 0              | -4.144649               | 1.149042  | 0.018373  |
| 8                | 6                | 0              | -4.671137               | -0.061325 | -0.265880 |
| 9                | 1                | 0              | 0.223862                | 2.804806  | 0.701107  |
| 10               | 1                | 0              | -2.234708               | 3.179242  | 0.573726  |
| 11               | 1                | 0              | -4.741414               | 2.042466  | 0.140320  |
| 12               | 1                | 0              | -5.712779               | -0.303827 | -0.406768 |
| 13               | 6                | 0              | 0.913927                | -2.234786 | -0.100803 |
| 14               | 6                | 0              | 1.115596                | -2.137054 | 1.247323  |
| 15               | 6                | 0              | 1.960678                | -1.027542 | 1.430767  |
| 16               | 6                | 0              | 2.235208                | -0.527450 | 0.178522  |
| 17               | 8                | 0              | 1.671758                | -1.328930 | -0.751166 |
| 18               | 1                | 0              | 0.383251                | -2.942807 | -0.713653 |
| 19               | 1                | 0              | 0.648511                | -2.745750 | 2.003099  |
| 20               | 1                | 0              | 2.293653                | -0.604925 | 2.363938  |
| 21               | 6                | 0              | 3.209892                | 0.505411  | -0.308360 |
| 22               | 6                | 0              | 4.520049                | -0.210869 | -0.678592 |
| 23               | 1                | 0              | 4.933953                | -0.734538 | 0.185013  |
| 24               | 1                | 0              | 4.350399                | -0.938416 | -1.474017 |
| 25               | 1                | 0              | 5.255566                | 0.516759  | -1.029081 |
| 26               | 6                | 0              | 3.473374                | 1.509774  | 0.813247  |
| 27               | 1                | 0              | 4.159441                | 2.282577  | 0.461584  |
| 28               | 1                | 0              | 2.545749                | 1.988648  | 1.133149  |
| 29               | 1                | 0              | 3.928843                | 1.027749  | 1.680665  |
| 30               | 6                | 0              | 2.665606                | 1.227647  | -1.544544 |
| 31               | 1                | 0              | 1.758550                | 1.784919  | -1.307962 |
| 32               | 1                | 0              | 3.417538                | 1.926190  | -1.917713 |
| 33               | 1                | 0              | 2.429431                | 0.519283  | -2.339190 |
| 34               | 16               | 0              | -3.485880               | -1.315261 | -0.407207 |
